# Supplementary material
Source: PubMed Central journal article supplement (PMC10583218)

## Supporting Information

# Rhodium(III) Catalyzed Anti-Markovnikov Hydroamidation of Unactivated Alkenes Using Dioxazolones as Amidating Reagents

Noah Wagner-Carlberg, Tomislav Rovis\*

Email: tr2504@columbia.edu

Department of Chemistry, Columbia University, New York, New York, 10027

## Contents

|                                                           |           |
|-----------------------------------------------------------|-----------|
| <b>1. General Information</b>                             | <b>2</b>  |
| <b>2. Preparation of Starting Materials</b>               | <b>2</b>  |
| <b>3. General Procedure for Hydroamidation of Alkenes</b> | <b>3</b>  |
| <b>4. Detailed Optimization Information</b>               | <b>4</b>  |
| <b>5. Product Characterization</b>                        | <b>10</b> |
| <b>6. Mechanistic Studies</b>                             | <b>29</b> |
| <b>7. Unsuccessful Substrates</b>                         | <b>34</b> |
| <b>8. References</b>                                      | <b>35</b> |
| <b>9. NMR Spectra</b>                                     | <b>37</b> |



To a 1.5-dram vial with magnetic stir bar were added 3.6 mg  $[\text{Cp}^*\text{CF}_3\text{RhCl}_2]_2$  (0.005 mmol, 5 mol%), and 15.2 mg  $\text{K}_2\text{CO}_3$  (0.11 mmol, 1.1 equiv.) under air. To a second 1.5-dram vial were added alkene (0.1 mmol, 1 equiv.) and dioxazolone\* (0.5 mmol, 5 equiv.) under air. In an argon atmosphere glovebox, the alkene and dioxazolone were dissolved in 200  $\mu\text{L}$  of dry DCE, and the resulting solution was transferred to the vial containing  $[\text{Cp}^*\text{CF}_3\text{RhCl}_2]_2$  and  $\text{K}_2\text{CO}_3$ . 50  $\mu\text{L}$  of dry *i*-PrOH were then added to this vial, and it was sealed by a screw cap with PTFE septum. Soon after the addition of *i*-PrOH, the reaction mixture darkened in color to a deep red. The vial was removed from the glovebox and heated to 70 °C in a heating block for two hours, with stirring.

The reaction was then removed from heat and quenched by the addition of about 1 mL of EtOAc. Successful reactions generally exhibited pressure buildup due to the evolution of  $\text{CO}_2$ . This solution was filtered through a short celite plug, and the vial was rinsed with two further 1 mL portions of EtOAc that were also filtered through the plug. The plug was then flushed with one final portion of EtOAc. The filtrate was concentrated by rotary evaporator and a crude  $^1\text{H}$  NMR spectrum was taken using  $\text{CDCl}_3$  as solvent and 0.1 mmol mesitylene as internal standard.

Purification of the products was carried out using Teledyne Isco Lumen CombiFlash, and 4 g RediSep Rf Disposable Flash columns. Hexanes/EtOAc or hexanes/acetone was used as eluent, and linear gradients from pure hexanes to the desired solvent ratio were generally used.

\*Note: dioxazolones that are solid at room temperature were instead weighed into the vial containing  $[\text{Cp}^*\text{CF}_3\text{RhCl}_2]_2$  and  $\text{K}_2\text{CO}_3$ .

#### **4. Detailed Optimization Information**

Please note: these optimization studies reflect the chronological order of experimentation, and as such, the conditions for each screen may be different from the standard conditions, which impacts the yields as well. Also note that all reactions prior to the time screen were run for 20 h, and at this length there was sometimes inconsistency in the yield.

All optimization reactions do not deviate from the general procedure detailed in **Section 3**, other than in the identity of the catalyst, base, etc. The major exception to this is reactions with  $\text{AgSbF}_6$ . In those cases, after all other components were weighed into their respective vials,  $\text{AgSbF}_6$  was weighed into the vial containing  $[\text{Cp}^*\text{CF}_3\text{RhCl}_2]_2$  and  $\text{K}_2\text{CO}_3$  in an argon atmosphere glovebox. Then, the standard procedure for DCE transfer and *i*-PrOH addition was carried out as usual.

**Table S1.** Solvent screening

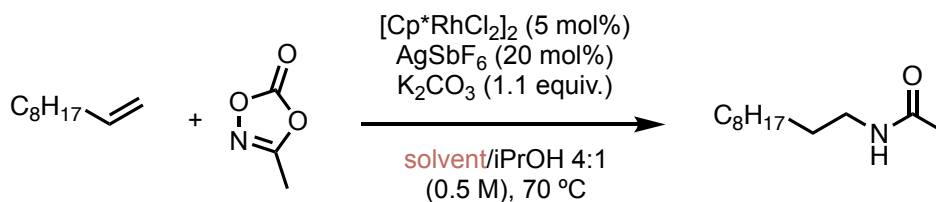

| Solvent           | Yield |
|-------------------|-------|
| DCE               | 25%   |
| MeCN              | 6%    |
| THF               | 15%   |
| TFE               | ND    |
| CHCl <sub>3</sub> | 16%   |
| toluene           | 14%   |

**Table S2.** Catalyst screening

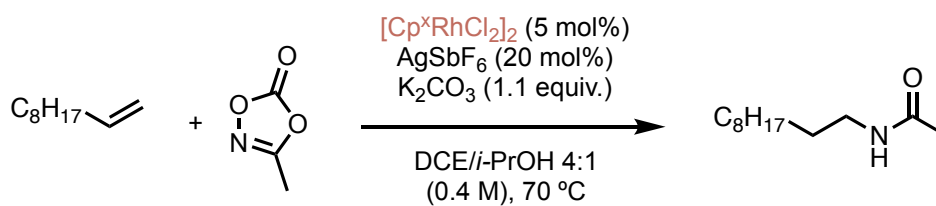

| Rhodium catalyst                  | Yield |
|-----------------------------------|-------|
| Cp*                               | 25%   |
| Cp <sup>t</sup>                   | 3%    |
| Cp <sup>E</sup>                   | 25%   |
| Cp <sup>3M</sup>                  | 6%    |
| Cp <sup>Ind*</sup>                | 10%   |
| Cp <sup>*CF<sub>3</sub></sup>     | 29%   |
| Cp <sup>Me</sup>                  | 8%    |
| Cp <sup>*tBu</sup>                | 2%    |
| Cp <sup>PhbisCF<sub>3</sub></sup> | ND    |
| Cp <sup>TM</sup>                  | 7%    |

**Table S3.** Concentration screening

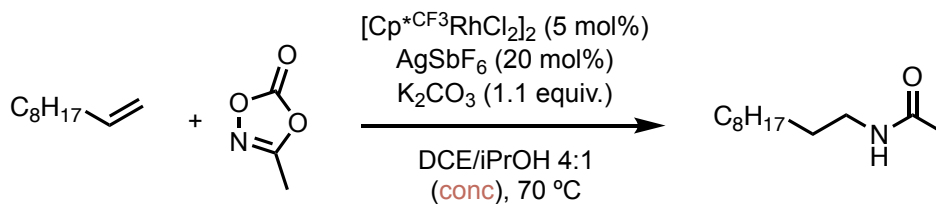

| Concentration | Yield |
|---------------|-------|
| 0.5 M         | 29%   |
| 0.4 M         | 43%   |
| 0.3 M         | 14%   |
| 0.2 M         | 20%   |
| 0.1 M         | 14%   |

**Table S4.** Silver loading screening

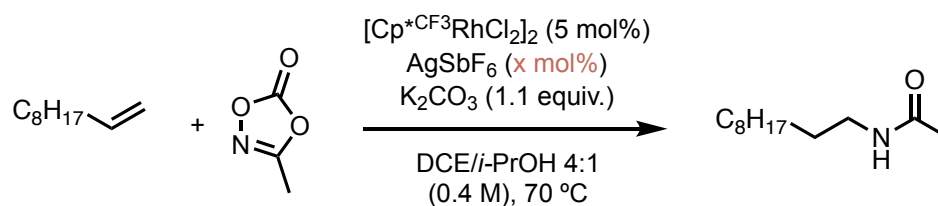

| AgSbF <sub>6</sub> loading | Yield |
|----------------------------|-------|
| 20 mol%                    | 25%   |
| 15 mol%                    | 56%   |
| 10 mol%                    | 62%   |
| 5 mol%                     | 61%   |
| —                          | 72%   |

**Table S4.** Base screening

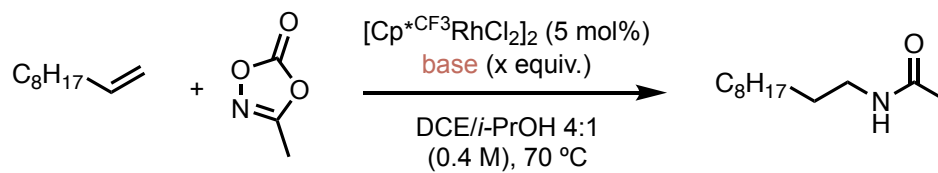

| Base                            | Yield |
|---------------------------------|-------|
| Li <sub>2</sub> CO <sub>3</sub> | 69%   |
| Na <sub>2</sub> CO <sub>3</sub> | 75%   |
| K <sub>2</sub> CO <sub>3</sub>  | 78%   |
| NaOAc                           | 47%   |
| KOAc                            | 34%   |

**Table S5.** Base loading screening

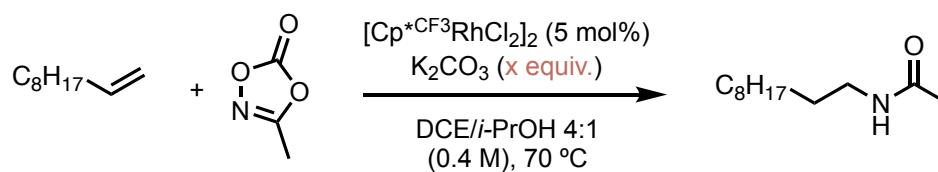

| K <sub>2</sub> CO <sub>3</sub> loading | Yield |
|----------------------------------------|-------|
| 0.7 equiv.                             | 64%   |
| 0.9 equiv.                             | 71%   |
| 1.1 equiv.                             | 74%   |
| 1.3 equiv.                             | 60%   |

**Table S6.** Dioxazolone loading screening

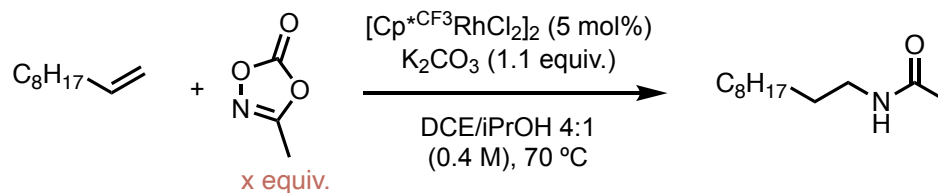

| Dioxazolone loading | Yield |
|---------------------|-------|
| 5 equiv.            | 78%   |
| 4 equiv.            | 69%   |
| 3 equiv.            | 61%   |
| 2 equiv.            | 55%   |

**Table S7.** Catalyst loading screening

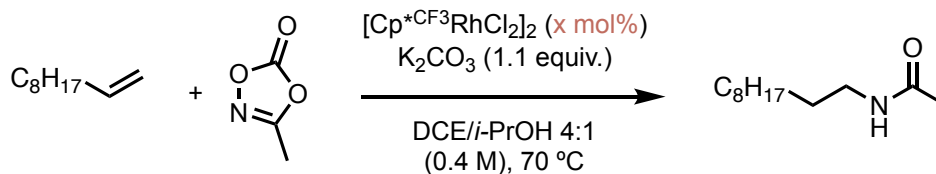

| Rh loading | Yield |
|------------|-------|
| 5 mol%     | 59%   |
| 4 mol%     | 43%   |
| 3 mol%     | 39%   |
| 2 mol%     | 25%   |
| 1 mol%     | <5%   |

**Table S8.** Reaction temperature screening

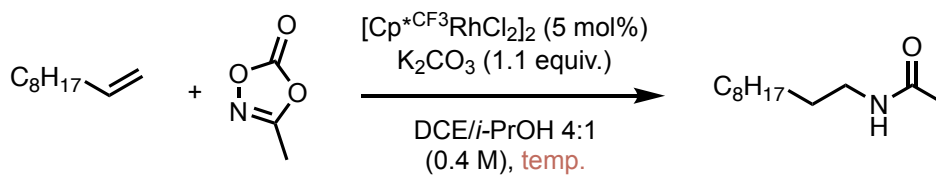

| Temperature | Yield |
|-------------|-------|
| rt (~20 °C) | 55%   |
| 30 °C       | 53%   |
| 40 °C       | 55%   |
| 60 °C       | 67%   |
| 70 °C       | 78%   |
| 80 °C       | 75%   |

**Table S9.** Reaction time screening

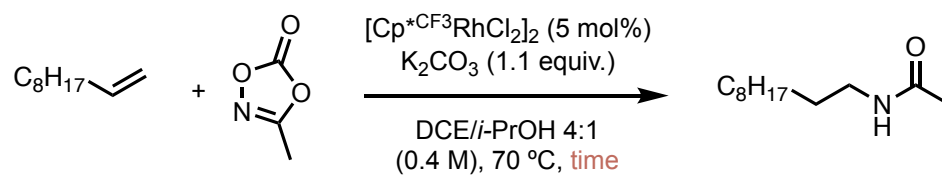

| Time | Yield |
|------|-------|
| 1 h  | 65%   |
| 2 h  | 79%   |
| 4 h  | 71%   |



## 5. Product Characterization

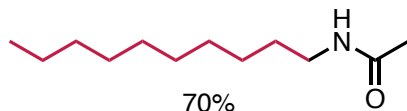

White solid

Spectral data match the literature.<sup>14</sup>

**<sup>1</sup>H NMR:** (500 MHz, CDCl<sub>3</sub>) δ 5.47 (br s, 1H), 3.25 (td, *J* = 7.3, 5.8 Hz, 2H), 1.99 (s, 3H), 1.51 (p, *J* = 7.3 Hz, 2H), 1.38 – 1.22 (m, 14H), 0.90 (t, *J* = 7.0 Hz, 3H).

**<sup>13</sup>C NMR:** (126 MHz, CDCl<sub>3</sub>) δ 169.93, 39.71, 31.88, 29.63, 29.54, 29.29, 26.93, 23.38, 22.67, 14.10.

**Purification:** elutes at 40% EtOAc

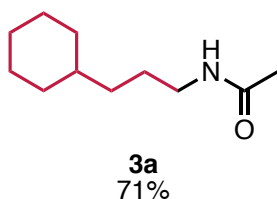

Pale yellow oil

**<sup>1</sup>H NMR:** (500 MHz, CDCl<sub>3</sub>) δ 5.46 (br s, 1H), 3.24 (td, *J* = 7.3, 5.7 Hz, 2H), 1.99 (s, 3H), 1.75 – 1.61 (m, 5H), 1.57 – 1.46 (m, 2H), 1.32 – 1.09 (m, 6H), 0.94 – 0.83 (m, 2H).

**<sup>13</sup>C NMR:** (126 MHz, CDCl<sub>3</sub>) δ 169.97, 40.03, 37.38, 34.60, 33.32, 26.98, 26.63, 26.33, 23.38.

**HRMS-ESI** (positive): *M* = C<sub>11</sub>H<sub>21</sub>NO, calculated (*M*+H) *m/z*: 184.1701, found: 184.1702

**Purification:** elutes at 35% EtOAc

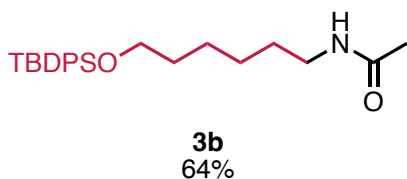

Colorless oil

**<sup>1</sup>H NMR:** (500 MHz, CDCl<sub>3</sub>) δ 7.73 – 7.65 (m, 4H), 7.48 – 7.37 (m, 6H), 5.45 (br s, 1H), 3.68 (t, *J* = 6.4 Hz, 2H), 3.24 (td, *J* = 7.2, 5.7 Hz, 2H), 1.98 (s, 3H), 1.63 – 1.54 (m, 2H), 1.50 (m, 2H), 1.40 (m, 2H), 1.35 – 1.27 (m, 2H), 1.07 (s, 9H).

**<sup>13</sup>C NMR:** <sup>13</sup>C NMR (126 MHz, CDCl<sub>3</sub>) δ 169.92, 135.58, 134.12, 129.53, 127.60, 63.81, 39.66, 32.42, 29.62, 26.90, 26.68, 25.53, 23.38, 19.23.

**HRMS-ESI** (positive): *M* = C<sub>24</sub>H<sub>35</sub>NO<sub>2</sub>Si, calculated (*M*+Na) *m/z*: 420.2335, found: 420.2349

**Purification:** elutes at 40% EtOAc

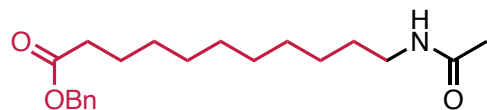

**3c**  
72%

White solid

**<sup>1</sup>H NMR:** (500 MHz, CDCl<sub>3</sub>) δ 7.42 – 7.31 (m, 5H), 5.44 (br s, 1H), 5.14 (s, 2H), 3.25 (td, *J* = 7.3, 5.8 Hz, 2H), 2.37 (t, *J* = 7.5 Hz, 2H), 1.99 (s, 3H), 1.66 (p, *J* = 7.5 Hz, 2H), 1.50 (p, *J* = 7.2 Hz, 2H), 1.38 – 1.25 (m, 14H).

**<sup>13</sup>C NMR:** (126 MHz, CDCl<sub>3</sub>) δ 173.70, 169.93, 136.15, 128.55, 128.16, 66.07, 39.69, 34.33, 29.62, 29.41, 29.31, 29.23, 29.18, 29.08, 26.89, 24.93, 23.39.

**HRMS-ESI** (positive): *M* = C<sub>20</sub>H<sub>31</sub>NO<sub>3</sub>, calculated (*M*+*H*) *m/z*: 334.2382, found: 334.1954

**Purification:** elutes at 45% EtOAc

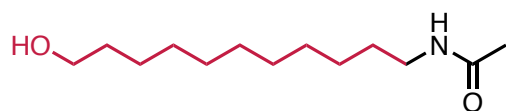

**3d**  
61%

White solid (76% NMR yield)

**<sup>1</sup>H NMR:** (500 MHz, CDCl<sub>3</sub>) δ 5.43 (br s, 1H), 3.66 (t, *J* = 6.7 Hz, 2H), 3.25 (td, *J* = 7.3, 5.8 Hz, 2H), 1.99 (s, 3H), 1.63 – 1.55 (p, 2H), 1.53 (p, *J* = 7.5 Hz, 2H), 1.42 – 1.26 (m, 14H).

**<sup>13</sup>C NMR:** (126 MHz, CDCl<sub>3</sub>) δ 169.95, 63.08, 39.70, 32.80, 29.62, 29.50, 29.45, 29.42, 29.36, 29.23, 26.87, 25.70, 23.39.

**HRMS-ESI** (positive): *M* = C<sub>13</sub>H<sub>27</sub>NO<sub>2</sub>, calculated (*M*+*H*) *m/z*: 230.2120, found: 230.2136

**Purification:** elutes at 70% EtOAc

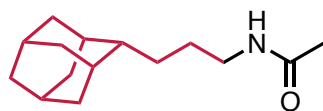

**3e**  
89%

White solid

**<sup>1</sup>H NMR:** (500 MHz, CDCl<sub>3</sub>) δ 5.46 (br s, 1H), 3.27 (td, *J* = 6.9, 5.6 Hz, 2H), 2.00 (s, 3H), 1.95 – 1.78 (m, 6H), 1.76 – 1.63 (m, 7H), 1.57 – 1.41 (m, 6H).

**<sup>13</sup>C NMR:** (126 MHz, CDCl<sub>3</sub>) δ 169.91, 44.15, 40.03, 39.24, 38.39, 31.83, 31.61, 29.86, 28.29, 28.07, 27.77, 23.41.

**HRMS-ESI** (positive): *M* = C<sub>15</sub>H<sub>25</sub>NO, calculated (*M*+*H*) *m/z*: 236.2014, found: 236.2029

**Purification:** elutes at 35% EtOAc

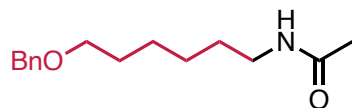

**3f**  
72%

Colorless oil

**<sup>1</sup>H NMR:** (500 MHz, CDCl<sub>3</sub>) δ 7.40 – 7.29 (m, 5H), 5.42 (br s, 1H), 4.52 (s, 2H), 3.49 (t, *J* = 6.5 Hz, 2H), 3.25 (td, *J* = 7.2, 5.7 Hz, 2H), 1.98 (s, 3H), 1.69 – 1.59 (m, 2H), 1.58 – 1.48 (m, 2H), 1.47 – 1.31 (m, 4H).

**<sup>13</sup>C NMR:** <sup>13</sup>C NMR (126 MHz, CDCl<sub>3</sub>) δ 169.93, 138.64, 128.37, 127.64, 127.52, 72.91, 70.28, 39.60, 29.64, 29.58, 26.74, 25.92, 23.38.

**HRMS-ESI** (positive): *M* = C<sub>15</sub>H<sub>23</sub>NO<sub>2</sub>, calculated (*M*+*H*) *m/z*: 250.1807, found: 250.1817

**Purification:** elutes at 40% EtOAc

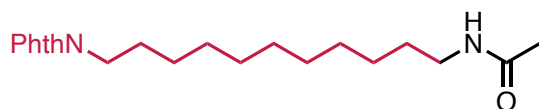

**3g**  
70%

White solid

**<sup>1</sup>H NMR:** (500 MHz, CDCl<sub>3</sub>) δ 7.89 – 7.82 (m, 2H), 7.72 (dd, *J* = 5.7, 3.1 Hz, 2H), 5.40 (br s, 1H), 3.70 (t, *J* = 7.3 Hz, 2H), 3.25 (q, *J* = 6.7 Hz, 2H), 1.98 (s, 3H), 1.71 (p, *J* = 7.2 Hz, 2H), 1.51 (p, *J* = 6.5 Hz, 2H), 1.44 – 1.10 (m, 14H).

**<sup>13</sup>C NMR:** (126 MHz, CDCl<sub>3</sub>) δ 169.73, 168.35, 133.72, 132.31, 123.07, 39.68, 38.07, 29.62, 29.46 – 29.24 (m), 29.17, 29.04, 28.50, 26.85, 26.78, 23.23.

**HRMS-ESI** (positive): *M* = C<sub>21</sub>H<sub>30</sub>N<sub>2</sub>O<sub>3</sub>, calculated (*M*+*H*) *m/z*: 359.2335, found: 359.2347

**Purification:** elutes at 60% EtOAc

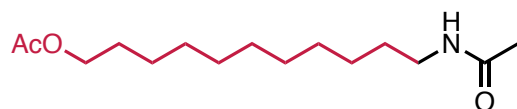

**3h**  
60%

White solid

**<sup>1</sup>H NMR:** (500 MHz, CDCl<sub>3</sub>) δ 5.44 (br s, 1H), 4.07 (t, *J* = 6.8 Hz, 2H), 3.25 (td, *J* = 7.2, 5.7 Hz, 2H), 2.07 (s, 3H), 1.99 (s, 3H), 1.68 – 1.59 (m, 2H), 1.51 (t, *J* = 7.2 Hz, 2H), 1.41 – 1.25 (m, 14H).

**<sup>13</sup>C NMR:** (126 MHz, CDCl<sub>3</sub>) δ 171.26, 169.93, 64.64, 39.70, 29.63, 29.48, 29.44, 29.26, 29.21, 28.59, 26.90, 25.88, 23.39, 21.02.

**HRMS-ESI** (positive): *M* = C<sub>15</sub>H<sub>29</sub>NO<sub>3</sub>, calculated (*M*+*H*) *m/z*: 272.2226, found: 272.2246

**Purification:** elutes at 50% EtOAc

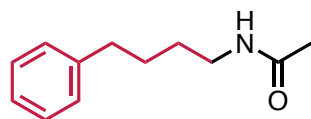

**3i**  
73%

Colorless oil

Spectral data match the literature.<sup>15</sup>

**<sup>1</sup>H NMR:** (500 MHz, CDCl<sub>3</sub>) δ 7.35 – 7.27 (m, 2H), 7.25 – 7.16 (m, 3H), 5.41 (br s, 1H), 3.28 (td, *J* = 7.2, 5.8 Hz, 2H), 2.66 (t, *J* = 7.6 Hz, 2H), 1.98 (s, 3H), 1.73 – 1.63 (m, 2H), 1.60 – 1.51 (m, 2H).

**<sup>13</sup>C NMR:** (126 MHz, CDCl<sub>3</sub>) δ 169.95, 142.07, 128.40, 128.36, 125.85, 39.50, 35.48, 29.21, 28.66, 23.37.

**Purification:** elutes at 40% EtOAc

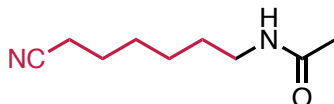

**3j**  
78%

Colorless oil (88% NMR Yield)

**<sup>1</sup>H NMR:** (500 MHz, CDCl<sub>3</sub>) δ 5.48 (br s, 1H), 3.27 (td, *J* = 7.2, 5.9 Hz, 2H), 2.37 (t, *J* = 7.1 Hz, 2H), 2.00 (s, 3H), 1.69 (p, *J* = 7.2 Hz, 2H), 1.59 – 1.46 (m, 4H), 1.46 – 1.34 (m, 2H).

**<sup>13</sup>C NMR:** <sup>13</sup>C NMR (126 MHz, CDCl<sub>3</sub>) δ 170.04, 119.72, 39.40, 29.43, 28.32, 26.05, 25.21, 23.39, 17.11.

**HRMS-ESI** (positive): *M* = C<sub>9</sub>H<sub>16</sub>N<sub>2</sub>O, calculated (*M*+Na) *m/z*: 191.1160, found: 191.1185

**Purification:** elutes at 60% EtOAc

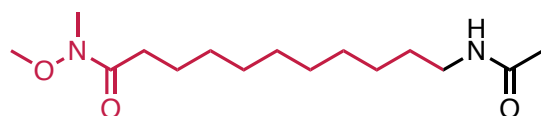

**3k**  
49%

White solid

**<sup>1</sup>H NMR:** (500 MHz, CDCl<sub>3</sub>) δ 5.48 (br s, 1H), 3.70 (s, 3H), 3.25 (td, *J* = 7.2, 5.7 Hz, 2H), 3.20 (s, 3H), 2.43 (t, *J* = 7.6 Hz, 2H), 1.99 (s, 3H), 1.63 (m, 2H), 1.50 (m, 2H), 1.38 – 1.26 (m, 12H).

**<sup>13</sup>C NMR:** (126 MHz, CDCl<sub>3</sub>) δ 174.82, 169.95, 61.21, 39.70, 32.18, 31.91, 29.60, 29.41, 29.40, 29.28 (d, *J* = 13.5 Hz), 26.87, 24.62, 23.38.

**HRMS-ESI** (positive): *M* = C<sub>15</sub>H<sub>30</sub>N<sub>2</sub>O<sub>3</sub>, calculated (*M*+H) *m/z*: 287.2335, found: 287.2321

**Purification:** elutes at 100% EtOAc

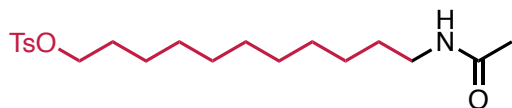

**3i**  
78%

Pale yellow solid

**<sup>1</sup>H NMR:** (500 MHz, CDCl<sub>3</sub>) δ 7.84 – 7.78 (m, 2H), 7.40 – 7.33 (m, 2H), 5.48 (br s, 1H), 4.04 (t, *J* = 6.5 Hz, 2H), 3.25 (td, *J* = 7.2, 5.7 Hz, 2H), 2.47 (s, 3H), 1.99 (s, 3H), 1.70 – 1.61 (m, 2H), 1.50 (p, *J* = 7.3 Hz, 2H), 1.36 – 1.19 (m, 14H).

**<sup>13</sup>C NMR:** (126 MHz, CDCl<sub>3</sub>) δ 169.97, 144.63, 133.27, 129.80, 127.88, 70.71, 39.69, 29.61, 29.40, 29.32, 29.30, 29.22, 28.85, 28.81, 26.87, 25.30, 23.38, 21.63.

**HRMS-ESI (positive):** M = C<sub>20</sub>H<sub>33</sub>NO<sub>4</sub>S, calculated (M+H) m/z: 384.2209, found: 384.2220

**Purification:** elutes at 60% EtOAc

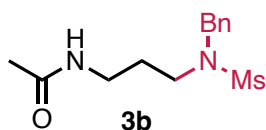

**3b**  
88%

Viscous yellow oil

**<sup>1</sup>H NMR:** (500 MHz, CDCl<sub>3</sub>) δ 7.44 – 7.32 (m, 5H), 6.02 (br s, 1H), 4.40 (s, 2H), 3.31 – 3.20 (m (td and t overlap), 4H), 2.82 (s, 3H), 1.95 (s, 3H), 1.68 – 1.59 (m, 2H).

**<sup>13</sup>C NMR:** (126 MHz, CDCl<sub>3</sub>) δ 170.24, 135.66, 128.91, 128.79, 128.38, 51.68, 44.86, 38.26, 35.57, 27.36, 23.33.

**HRMS-ESI (positive):** M = C<sub>13</sub>H<sub>20</sub>N<sub>2</sub>O<sub>3</sub>S, calculated (M+H) m/z: 285.1273, found: 285.1120

**Purification:** elutes at 90% EtOAc

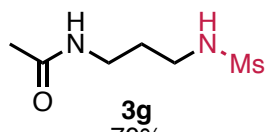

**3g**  
70%

Pale red oil

**<sup>1</sup>H NMR:** (500 MHz, CDCl<sub>3</sub>) δ 5.89 (br s, 1H), 5.39 (br t, 1H), 3.41 (q, *J* = 6.4 Hz, 2H), 3.21 – 3.14 (td, 2H), 2.97 (s, 3H), 2.02 (s, 3H), 1.75 (tt, *J* = 7.5, 5.4 Hz, 2H).

**<sup>13</sup>C NMR:** (126 MHz, CDCl<sub>3</sub>) δ 171.21, 40.33, 39.90, 35.93, 30.51, 23.23.

**HRMS-ESI (positive):** M = C<sub>2</sub>H<sub>14</sub>N<sub>2</sub>O<sub>3</sub>S, calculated (M+Na) m/z: 217.0623, found: 217.0647

**Purification:** elutes at 50% acetone

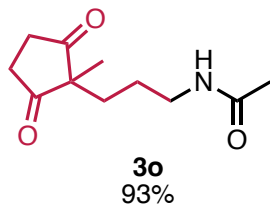

Not isolated

**<sup>1</sup>H NMR:** (400 MHz, CDCl<sub>3</sub>) δ 6.07 (br s, 1H), 3.12 (td, *J* = 6.9, 5.8 Hz, 2H), 2.84 – 2.67 (m, 4H), 1.94 (s, 3H), 1.68 – 1.60 (m, 2H), 1.42 – 1.31 (m, 2H), 1.10 (s, 3H).

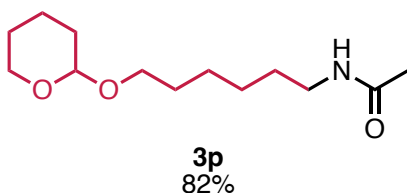

Pale yellow oil

**<sup>1</sup>H NMR:** (500 MHz, CDCl<sub>3</sub>) δ 5.46 (br s, 1H), 4.58 (dd, *J* = 4.6, 2.7 Hz, 1H), 3.89 (ddd, *J* = 11.0, 7.2, 3.5 Hz, 1H), 3.75 (dt, *J* = 9.6, 6.8 Hz, 1H), 3.52 (dddd, *J* = 11.0, 5.3, 3.7, 1.4 Hz, 1H), 3.40 (dt, *J* = 9.6, 6.5 Hz, 1H), 3.26 (td, *J* = 7.2, 5.8 Hz, 2H), 1.99 (s, 3H), 1.85 (qd, *J* = 7.5, 3.2 Hz, 1H), 1.77 – 1.69 (m, 1H), 1.69 – 1.49 (m, 8H), 1.49 – 1.32 (m, 4H).

**<sup>13</sup>C NMR:** (126 MHz, CDCl<sub>3</sub>) δ 169.96, 98.97, 67.48, 62.47, 39.62, 30.80, 29.63, 29.57, 26.74, 25.95, 25.49, 23.38, 19.76.

**HRMS-ESI** (positive): *M* = C<sub>13</sub>H<sub>25</sub>NO<sub>3</sub>, calculated (*M*+Na) *m/z*: 266.1732, found: 266.1745

**Purification:** elutes at 60% EtOAc

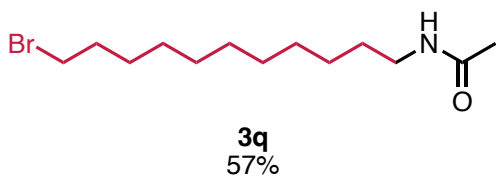

White solid

**<sup>1</sup>H NMR:** (500 MHz, CDCl<sub>3</sub>) δ 5.43 (br s, 1H), 3.43 (t, *J* = 6.8 Hz, 2H), 3.25 (td, *J* = 7.3, 5.8 Hz, 2H), 1.99 (s, 3H), 1.87 (p, *J* = 7.0 Hz, 2H), 1.51 (m, 2H), 1.43 (m, 2H), 1.31 (dd, *J* = 11.8, 6.5 Hz, 12H).

**<sup>13</sup>C NMR:** (126 MHz, CDCl<sub>3</sub>) δ 169.94, 39.70, 34.09, 32.83, 29.64, 29.47, 29.43, 29.39, 29.27, 28.74, 28.16, 26.91, 23.42.

**HRMS-ESI** (positive): *M* = C<sub>13</sub>H<sub>26</sub>BrNO, calculated (*M*+Na) *m/z*: 314.1096 and 316.1076, found: 314.1123 and 316.1104

**Purification:** elutes at 35% EtOAc

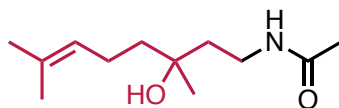

**3r**  
52%  
from linalool

Colorless oil

**<sup>1</sup>H NMR:** (500 MHz, CDCl<sub>3</sub>) δ 6.30 (br s, 1H), 5.14 (dddd, *J* = 7.1, 5.7, 2.9, 1.5 Hz, 1H), 3.51 – 3.33 (m, 2H), 2.12 – 2.02 (m, 2H), 1.98 (s, 3H), 1.78 (s, 1H), 1.75-1.64 (m, 2H), 1.72 (d, *J* = 1.4 Hz, 3H), 1.65 (d, *J* = 1.2 Hz, 3H), 1.58 – 1.53 (m, 2H), 1.25 (s, 3H).

**<sup>13</sup>C NMR:** (126 MHz, CDCl<sub>3</sub>) δ 170.10, 132.28, 123.97, 73.32, 42.31, 39.72, 35.74, 26.75, 25.71, 23.42, 22.73, 17.70.

**HRMS-ESI** (positive): *M* = C<sub>12</sub>H<sub>23</sub>NO<sub>2</sub>, calculated (*M*+Na) *m/z*: 236.1626, found: 236.1647

**Purification:** elutes at 40% acetone

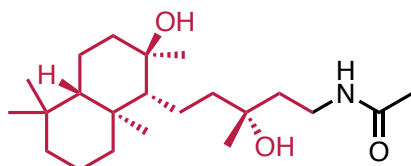

**3s**  
71%  
from sclareol

Colorless oil

Note: fresh sclareol from Thermo Fisher appeared to be diastereomerically impure by NMR, and as a result the NMR of the product also shows some peaks corresponding to a different diastereomer. The peaks for which this is most noticeable are the N–H proton at 6.50 ppm and the N–C α-protons at 3.41.

**<sup>1</sup>H NMR:** (500 MHz, CDCl<sub>3</sub>) δ 6.50 (br s, 1H), 3.47 (dq, *J* = 13.6, 6.2 Hz, 1H), 3.32 (dtd, *J* = 13.9, 7.0, 4.5 Hz, 1H), 1.97 (s, 3H), 1.86 (dt, *J* = 12.2, 3.3 Hz, 1H), 1.73 – 1.53 (m, 8H), 1.52-1.32 (m, 5H), 1.31 – 1.26 (m, 1H), 1.23 (s, 3H), 1.21 (s, *J* = 0.9 Hz, 3H), 1.20 – 1.12 (m, 1H), 1.04 – 0.92 (m, 2H), 0.89 (s, 3H), 0.81 (s, 3H), 0.81 (s, 3H).

**<sup>13</sup>C NMR:** (126 MHz, CDCl<sub>3</sub>) δ 170.13, 75.04, 73.47, 61.64, 56.03, 44.80, 44.26, 41.98, 40.67, 39.73, 39.22, 35.95, 33.37, 33.23, 26.07, 24.54, 23.45, 21.49, 20.53, 18.72, 18.40, 15.33.

**HRMS-ESI** (positive): *M* = C<sub>22</sub>H<sub>41</sub>NO<sub>3</sub>, calculated (*M*+Na) *m/z*: 390.2984, found: 390.2988

**Purification:** elutes at 40% acetone

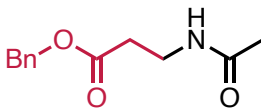

**3t**  
63%

Pale yellow oil

**<sup>1</sup>H NMR:** (500 MHz, CDCl<sub>3</sub>) δ 7.44 – 7.33 (m, 5H), 6.04 (br s, 1H), 5.17 (s, 2H), 3.55 (q, *J* = 6.1 Hz, 2H), 2.65 – 2.59 (m, 2H), 1.96 (s, 3H).

**<sup>13</sup>C NMR:** (126 MHz, CDCl<sub>3</sub>) δ 172.58, 170.03, 135.61, 128.66, 128.44, 128.25, 66.58, 34.91, 34.08, 23.29.

**HRMS-ESI** (positive): M = C<sub>12</sub>H<sub>15</sub>NO<sub>3</sub>, calculated (M+H) m/z: 244.0950, found: 244.0962

**Purification:** elutes at 25% acetone

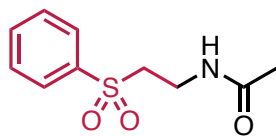

**3u**  
53%

White solid

**<sup>1</sup>H NMR:** <sup>1</sup>H NMR (500 MHz, CDCl<sub>3</sub>) δ 7.97 – 7.91 (m, 2H), 7.75 – 7.68 (m, 1H), 7.66 – 7.59 (m, 2H), 6.29 (br s, 1H), 3.75 – 3.67 (m, 2H), 3.35 – 3.29 (m, 2H), 1.98 (s, 3H).

**<sup>13</sup>C NMR:** <sup>13</sup>C NMR (126 MHz, CDCl<sub>3</sub>) δ 170.28, 138.97, 134.16, 129.58, 127.89, 55.48, 33.34, 23.16.

**HRMS-ESI** (positive): M = C<sub>10</sub>H<sub>13</sub>NO<sub>3</sub>S, calculated (M+Na) m/z: 250.0514, found: 250.0537

**Purification:** elutes at 40% acetone

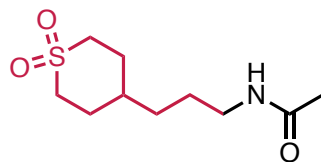

**3v**  
86%

Pale orange solid

**<sup>1</sup>H NMR:** (500 MHz, CDCl<sub>3</sub>) δ 5.54 (br s, 1H), 3.26 (td, *J* = 7.2, 6.0 Hz, 2H), 3.10 – 3.02 (m, 2H), 3.02 – 2.92 (m, 2H), 2.15 – 2.02 (m, 2H), 2.00 (s, 3H), 1.86 (dddd, *J* = 16.3, 11.3, 9.6, 3.3 Hz, 2H), 1.62 – 1.50 (m, 3H), 1.43 – 1.33 (m, 2H).

**<sup>13</sup>C NMR:** (126 MHz, CDCl<sub>3</sub>) δ 170.12, 50.92, 39.43, 34.98, 32.25, 29.90, 27.21, 23.34.

**HRMS-ESI** (positive): M = C<sub>10</sub>H<sub>19</sub>NO<sub>3</sub>S, calculated (M+H) m/z: 234.1164, found: 234.1157

**Purification:** elutes at 55% acetone



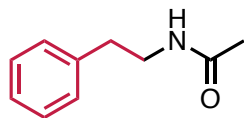

**3w**  
86%

Pale yellow solid

Spectral data match the literature.<sup>6</sup>

**<sup>1</sup>H NMR:** (500 MHz, CDCl<sub>3</sub>) δ 7.39 – 7.30 (m, 2H), 7.28 – 7.24 (m, 1H), 7.23 – 7.18 (m, 2H), 5.46 (br s, 1H), 3.55 (td, *J* = 6.9, 5.8 Hz, 2H), 2.84 (t, *J* = 6.9 Hz, 2H), 1.96 (s, 3H).

**<sup>13</sup>C NMR:** <sup>13</sup>C NMR (126 MHz, CDCl<sub>3</sub>) δ 170.01, 138.88, 128.76, 128.67, 126.55, 40.64, 35.64, 23.34.

**Purification:** elutes at 40% EtOAc

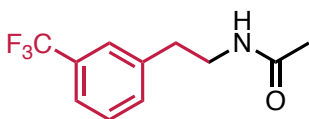

**3x**  
78%

Colorless oil (93% NMR yield)

**<sup>1</sup>H NMR:** (500 MHz, CDCl<sub>3</sub>) δ 7.52 (d, *J* = 7.7 Hz, 1H), 7.49 – 7.39 (m, 4H), 5.50 (s, 1H), 3.59 – 3.49 (m, 2H), 2.91 (t, *J* = 7.1 Hz, 2H), 1.98 (s, 3H).

**<sup>13</sup>C NMR:** (126 MHz, CDCl<sub>3</sub>) δ 170.12, 139.85, 132.16, 130.97 (q), 129.09, 125.49, 123.45, 40.54, 35.53, 23.28.

**HRMS-ESI** (positive): *M* = C<sub>11</sub>H<sub>12</sub>F<sub>3</sub>NO, calculated (*M*+*H*) *m/z*: 232.0949, found: 232.0967

**Purification:** elutes at 45% EtOAc

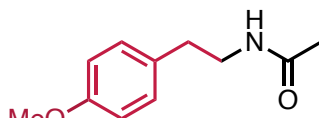

**3y**  
52%

Yellow solid

Spectral data match the literature.<sup>16</sup>

**<sup>1</sup>H NMR:** (500 MHz, CDCl<sub>3</sub>) δ 7.17 – 7.10 (m, 2H), 6.91 – 6.85 (m, 2H), 5.43 (s, 1H), 3.82 (s, 3H), 3.54 – 3.47 (m, 2H), 2.78 (t, *J* = 6.9 Hz, 2H), 1.96 (s, 3H).

**<sup>13</sup>C NMR:** <sup>13</sup>C NMR (126 MHz, CDCl<sub>3</sub>) δ 170.00, 158.33, 130.83, 129.69, 114.10, 55.29, 40.82, 34.71, 23.36.

**Purification:** elutes at 50% EtOAc

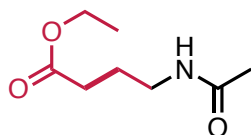

**3z**  
40%

Colorless oil (from ethyl crotonate)

**<sup>1</sup>H NMR:** (500 MHz, CDCl<sub>3</sub>) δ 5.72 (s, 1H), 4.16 (q, *J* = 7.1 Hz, 2H), 3.32 (td, *J* = 6.9, 5.7 Hz, 2H), 2.38 (t, *J* = 7.1 Hz, 2H), 1.99 (s, 3H), 1.86 (p, *J* = 7.0 Hz, 2H), 1.28 (t, *J* = 7.2 Hz, 3H).

**<sup>13</sup>C NMR:** (126 MHz, CDCl<sub>3</sub>) δ 173.52, 170.13, 60.59, 39.15, 31.83, 24.59, 23.31, 14.21.

**HRMS-ESI** (positive): *M* = C<sub>8</sub>H<sub>15</sub>NO<sub>3</sub>, calculated (*M*+Na) *m/z*: 196.0950, found: 196.0974

**Purification:** elutes at 25% EtOAc

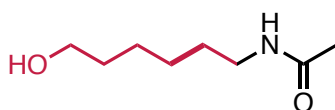

**3aa**  
35%

Yellow solid (from trans 3-penten-1-ol)

Spectral data match the literature.<sup>17</sup>

**<sup>1</sup>H NMR:** (500 MHz, CDCl<sub>3</sub>) δ 5.46 (br s, 1H), 3.67 (t, *J* = 6.5 Hz, 2H), 3.27 (td, *J* = 7.2, 5.9 Hz, 2H), 2.00 (s, 3H), 1.65 – 1.56 (m, 2H), 1.53 (m, 2H), 1.47 – 1.32 (m, 4H).

**<sup>13</sup>C NMR:** (126 MHz, CDCl<sub>3</sub>) δ 170.03, 62.74, 39.48, 32.55, 29.63, 26.52, 25.30, 23.38.

**Purification:** elutes at 80% EtOAc

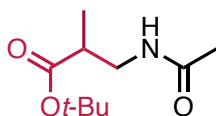

**3ab**  
95%

Pale yellow oil

**<sup>1</sup>H NMR:** (500 MHz, CDCl<sub>3</sub>) δ 6.01 (br s, 1H), 3.49 (ddd, *J* = 13.6, 6.6, 4.3 Hz, 1H), 3.27 (ddd, *J* = 13.8, 8.3, 5.6 Hz, 1H), 2.60 (dq, *J* = 8.4, 7.3, 4.4 Hz, 1H), 1.99 (s, 3H), 1.47 (s, 9H), 1.16 (d, *J* = 7.2 Hz, 3H).

**<sup>13</sup>C NMR:** (126 MHz, CDCl<sub>3</sub>) δ 175.08, 170.06, 80.93, 41.67, 40.24, 28.07, 23.33, 14.96.

**HRMS-ESI** (positive): *M* = C<sub>10</sub>H<sub>19</sub>NO<sub>3</sub>, calculated (*M*+Na) *m/z*: 224.14, found: 224.1284

**Purification:** elutes at 20% acetone

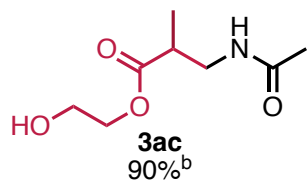

Pale yellow oil

**<sup>1</sup>H NMR:** (500 MHz, CDCl<sub>3</sub>) δ 6.18 (br s, 1H), 5.50 (br s, 2H), 4.31 (ddd, *J* = 11.8, 5.6, 3.8 Hz, 1H), 4.23 (ddd, *J* = 11.8, 5.2, 3.7 Hz, 1H), 3.87 – 3.82 (m, 2H), 3.60 (ddd, *J* = 13.8, 6.8, 4.2 Hz, 1H), 3.36 (ddd, *J* = 14.0, 8.4, 5.9 Hz, 1H), 2.74 (dddd, *J* = 10.1, 7.2, 4.2, 3.0 Hz, 1H), 1.99 (s, 3H), 1.22 (d, *J* = 7.2 Hz, 3H).

**<sup>13</sup>C NMR:** (126 MHz, CDCl<sub>3</sub>) δ 175.33, 170.58, 66.23, 60.88, 41.94, 40.01, 23.25, 14.70.

**HRMS-ESI** (positive): *M* = C<sub>8</sub>H<sub>15</sub>NO<sub>4</sub>, calculated (*M*+Na) *m/z*: 212.0899, found: 212.0915

**Purification:** elutes at 40% acetone

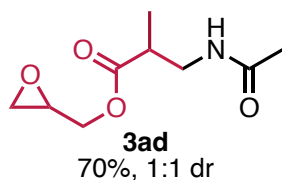

Orange oil

**<sup>1</sup>H NMR:** <sup>1</sup>H NMR (500 MHz, CDCl<sub>3</sub>) δ 6.03 (br s, 1H), 4.52 (ddd, *J* = 16.4, 12.3, 2.9 Hz, 1H), 3.99 (dd, *J* = 12.3, 6.0 Hz, 1H), 3.57 (dddd, *J* = 11.2, 10.1, 4.3, 3.2 Hz, 1H), 3.30 (dtd, *J* = 13.9, 8.2, 5.8 Hz, 1H), 3.26 – 3.22 (m, 1H), 2.88 (dt, *J* = 4.9, 4.1 Hz, 1H), 2.78 (dddd, *J* = 11.5, 7.2, 5.8, 2.8 Hz, 1H), 2.69 (dd, *J* = 4.9, 2.6 Hz, 1H), 1.99 (d, *J* = 1.9 Hz, 3H), 1.22 (dd, *J* = 7.2, 1.4 Hz, 3H).

**<sup>13</sup>C NMR:** <sup>13</sup>C NMR (126 MHz, CDCl<sub>3</sub>) δ 175.17, 170.22, 64.53 (d, *J* = 36.6 Hz), 49.27, 44.59 (d, *J* = 16.5 Hz), 41.68 (d, *J* = 3.3 Hz), 39.61 (d, *J* = 6.4 Hz), 23.27, 14.79 (d, *J* = 4.3 Hz).

**HRMS-ESI** (positive): *M* = C<sub>9</sub>H<sub>15</sub>NO<sub>4</sub>, calculated (*M*+Na) *m/z*: 224.0899, found: 224.0921

**Purification:** elutes at 30% acetone

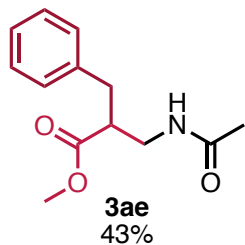

Pale yellow oil

Spectral data match the literature.<sup>18</sup>

**<sup>1</sup>H NMR:** (500 MHz, CDCl<sub>3</sub>) δ 7.31 (dd, *J* = 8.1, 6.7 Hz, 2H), 7.27 – 7.21 (m, 1H), 7.20 – 7.14 (m, 2H), 5.84 (br s, 1H), 3.68 (s, 3H), 3.55 (ddd, *J* = 13.6, 6.2, 4.0 Hz, 1H), 3.38 (ddd, *J* = 13.8, 8.1, 5.8 Hz, 1H), 3.03 – 2.93 (m, 2H), 2.91 – 2.80 (m, 1H), 1.96 (s, 3H).

**<sup>13</sup>C NMR:** <sup>13</sup>C NMR (126 MHz, CDCl<sub>3</sub>) δ 174.86, 170.10, 138.04, 128.84, 128.57, 126.70, 51.86, 46.67, 40.22, 36.06, 23.29.

**Purification:** elutes at 25% acetone

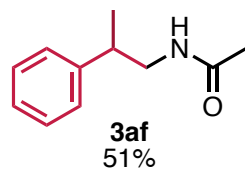

Colorless oil

Spectral data match the literature.<sup>19</sup>

**<sup>1</sup>H NMR:** (500 MHz, CDCl<sub>3</sub>) δ 7.40 – 7.32 (m, 2H), 7.30 – 7.22 (m, 3H), 5.29 (br s, 1H), 3.68 (ddd, *J* = 13.2, 7.1, 5.8 Hz, 1H), 3.24 (ddd, *J* = 13.6, 9.0, 4.8 Hz, 1H), 3.01 – 2.88 (m, 1H), 1.92 (s, 2H), 1.30 (d, *J* = 7.0 Hz, 3H).

**<sup>13</sup>C NMR:** (126 MHz, CDCl<sub>3</sub>) δ 169.97, 144.09, 128.76, 127.20, 126.76, 46.12, 39.73, 23.31, 19.46.

**Purification:** elutes at 15% acetone

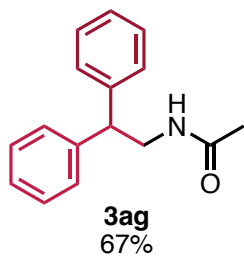

Pale yellow solid

Spectral data match the literature.<sup>20</sup>

**<sup>1</sup>H NMR:** (500 MHz, CDCl<sub>3</sub>) δ 7.40 – 7.31 (m, 4H), 7.28 – 7.18 (m, 6H), 5.39 (br s, 1H), 4.20 (t, *J* = 8.0 Hz, 1H), 3.92 (dd, *J* = 7.9, 5.8 Hz, 2H), 1.91 (s, 3H).

**<sup>13</sup>C NMR:** <sup>13</sup>C NMR (126 MHz, CDCl<sub>3</sub>) δ 170.00, 141.84, 128.76, 128.04, 126.87, 50.57, 43.85, 23.34.

**Purification:** elutes at 15% acetone

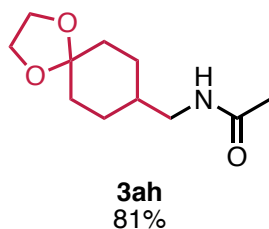

Colorless oil

**<sup>1</sup>H NMR:** (500 MHz, CDCl<sub>3</sub>) δ 5.52 (br s, 1H), 4.00 – 3.91 (m, 4H), 3.16 (t, *J* = 6.4 Hz, 2H), 2.01 (s, 3H), 1.77 (dddd, *J* = 17.9, 12.6, 4.7, 2.8 Hz, 4H), 1.59 – 1.48 (m, 3H), 1.36 – 1.24 (m, 2H).

**<sup>13</sup>C NMR:** (126 MHz, CDCl<sub>3</sub>) δ 170.06, 108.78, 64.26, 44.97, 36.51, 34.12, 27.83, 23.40.

**HRMS-ESI** (positive): *M* = C<sub>11</sub>H<sub>19</sub>NO<sub>3</sub>, calculated (*M*+*H*) *m/z*: 214.1443, found: 214.1461

**Purification:** elutes at 65% EtOAc

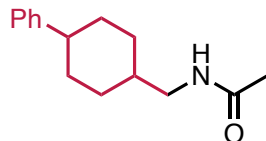

**3ai**

60%, 2.0:1 dr

Pale yellow solid

**<sup>1</sup>H NMR:** (500 MHz, CDCl<sub>3</sub>) δ 7.31 (m, 3H), 7.22 (m, 4.5H), 5.60 (br s, 1H), 5.52 (br s, 0.5H), 3.38 (dd, *J* = 7.8, 5.9 Hz, 1H), 3.18 (t, *J* = 6.4 Hz, 2H), 2.61 (ddd, *J* = 14.1, 8.4, 5.7 Hz, 0.5H), 2.50 (tt, *J* = 12.2, 3.4 Hz, 1H), 2.02 (d, *J* = 1.0 Hz, 4.5H), 2.00 – 1.85 (m, 5H), 1.80 – 1.63 (m, 4H), 1.57 (ddt, *J* = 15.4, 8.6, 3.5 Hz, 1H), 1.49 (qd, *J* = 12.8, 3.1 Hz, 2H), 1.14 (qd, *J* = 12.8, 3.3 Hz, 2H).

**<sup>13</sup>C NMR:** (126 MHz, CDCl<sub>3</sub>) δ 170.12, 147.23, 146.88, 128.33 (d, *J* = 3.9 Hz), 126.85 (d, *J* = 17.0 Hz), 125.93 (d, *J* = 14.2 Hz), 45.82, 44.32, 43.28, 41.52, 37.63, 33.64, 33.46 (d, *J* = 14.9 Hz), 31.05, 28.80, 27.92, 23.41.

**HRMS-ESI** (positive): *M* = C<sub>15</sub>H<sub>21</sub>NO, calculated (*M*+H) *m/z*: 232.1701, found: 232.1725

**Purification:** elutes at 50% EtOAc

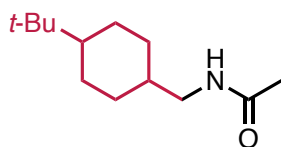

**3aj**

47%, 2.5:1 dr

White solid

**<sup>1</sup>H NMR:** (500 MHz, CDCl<sub>3</sub>) δ 5.53 (br s, 1H), 5.44 (br s, 0.5H), 3.29 (dd, *J* = 7.8, 5.8 Hz, 1H), 3.10 (dd, *J* = 6.8, 6.0 Hz, 2H), 2.00 (d, *J* = 2.8 Hz, 4H), 1.81 (dt, *J* = 12.9, 3.9 Hz, 4H), 1.69 (s, 1H), 1.59 – 1.53 (m, 1H), 1.45 – 1.34 (m, 1H), 1.20 – 1.08 (m, 1H), 1.06 – 0.88 (m, 5H), 0.85 (s, 13.5H).

**<sup>13</sup>C NMR:** <sup>13</sup>C NMR (126 MHz, CDCl<sub>3</sub>) δ 170.04, 48.42, 48.07, 45.89, 40.86, 38.00, 32.80, 32.55, 32.41, 31.26, 28.55, 27.54, 27.48, 26.77, 23.39, 21.83.

**HRMS-ESI** (positive): *M* = C<sub>13</sub>H<sub>25</sub>NO, calculated (*M*+H) *m/z*: 212.20, found: 212.2036

**Purification:** elutes at 40% EtOAc

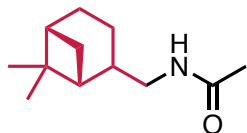

**3ak**

31%, 4.0:1 dr  
from  $\beta$ -pinene

Colorless oil

**$^1\text{H NMR}$ :** (500 MHz,  $\text{CDCl}_3$ )  $\delta$  5.43 (s, 1H), 3.20 – 2.98 (m, 2H), 2.18 – 2.00 (m, 2H), 1.99 (s, 3H), 1.93 – 1.87 (m, 1H), 1.82 – 1.73 (m, 2H), 1.68 (dtd,  $J = 14.6, 8.4, 1.6$  Hz, 1H), 1.36 (d,  $J = 10.1$  Hz, 1H), 1.23 (s, 2H), 0.85 (s, 2H).

**$^{13}\text{C NMR}$ :** (126 MHz,  $\text{CDCl}_3$ )  $\delta$  170.00, 44.34, 43.26, 40.88, 35.09, 26.68, 24.08, 23.44, 23.36, 20.13, 19.74.

**HRMS-ESI** (positive):  $M = \text{C}_{12}\text{H}_{21}\text{NO}$ , calculated (M+H)  $m/z$ : 196.1701, found: 196.1719

**Purification:** elutes at 40% EtOAc

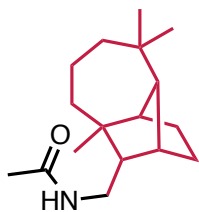

**3al**

14%, >20:1 dr  
from (+)-longifolene

Not isolated

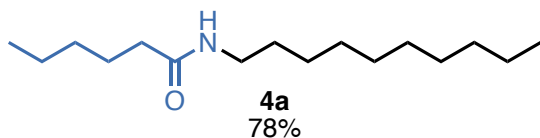

**4a**  
78%

Pale yellow solid

**$^1\text{H NMR}$ :**  $^1\text{H NMR}$  (500 MHz,  $\text{CDCl}_3$ )  $\delta$  5.41 (br s, 1H), 3.26 (td,  $J = 7.2, 5.8$  Hz, 2H), 2.21 – 2.14 (m, 2H), 1.71 – 1.60 (m, 2H), 1.51 (p,  $J = 7.1$  Hz, 2H), 1.41 – 1.24 (m, 18H), 0.91 (q,  $J = 7.1$  Hz, 6H).

**$^{13}\text{C NMR}$ :** (126 MHz,  $\text{CDCl}_3$ )  $\delta$  173.02, 39.50, 36.94, 31.89, 31.50, 29.70, 29.56, 29.54, 29.31, 26.93, 25.54, 22.68, 22.43, 14.12, 13.96.

**HRMS-ESI** (positive):  $M = \text{C}_{16}\text{H}_{33}\text{NO}$ , calculated (M+H)  $m/z$ : 256.2640, found: 256.2654

**Purification:** elutes at 15% EtOAc

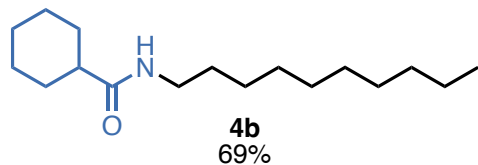

White solid

Spectral data match the literature.<sup>1</sup>

**<sup>1</sup>H NMR:** (500 MHz, CDCl<sub>3</sub>) δ 5.40 (br s, 1H), 3.25 (td, *J* = 7.3, 5.7 Hz, 2H), 2.07 (tt, *J* = 11.8, 3.5 Hz, 1H), 1.92 – 1.77 (m, 4H), 1.72 – 1.65 (m, 1H), 1.55 – 1.39 (m, 4H), 1.33 – 1.26 (m, 17H), 0.90 (t, *J* = 6.9 Hz, 3H).

**<sup>13</sup>C NMR:** (126 MHz, CDCl<sub>3</sub>) δ 175.92, 45.69, 39.32, 31.89, 29.78, 29.71, 29.54, 29.30, 26.90, 25.79, 22.68, 14.11.

**Purification:** elutes at 10% EtOAc

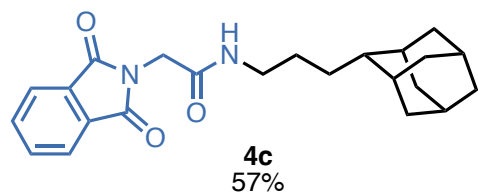

White solid

**<sup>1</sup>H NMR:** (500 MHz, CDCl<sub>3</sub>) δ 7.91 (dd, *J* = 5.5, 3.1 Hz, 2H), 7.77 (dd, *J* = 5.5, 3.0 Hz, 2H), 5.78 (br s, 1H), 4.35 (s, 2H), 3.30 (td, *J* = 7.1, 5.7 Hz, 2H), 1.91 – 1.75 (m, 6H), 1.75 – 1.62 (m, 7H), 1.56 – 1.39 (m, 6H).

**<sup>13</sup>C NMR:** (126 MHz, CDCl<sub>3</sub>) δ 167.80, 165.88, 134.26, 132.02, 123.65, 44.06, 41.04, 40.23, 39.21, 38.39, 31.78, 31.56, 29.76, 28.28, 28.06, 27.58.

**HRMS-ESI** (positive): *M* = C<sub>23</sub>H<sub>28</sub>N<sub>2</sub>O<sub>3</sub>, calculated (*M*+*H*) *m/z*: 381.2178, found: 381.2188

**Purification:** elutes at 25% EtOAc



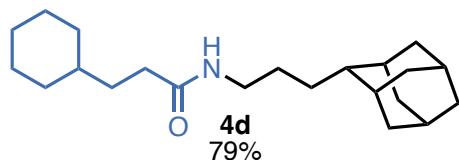

Colorless oil, some impurity remains (91% NMR yield)

**<sup>1</sup>H NMR:** (500 MHz, CDCl<sub>3</sub>) δ 5.41 (br s, 1H), 3.28 (m, 2H), 2.22 – 2.15 (m, 2H), 1.92 – 1.77 (m, 6H), 1.78 – 1.62 (m, 12H), 1.58 – 1.37 (m, 7H), 1.34 – 1.10 (m, 6H), 0.92 (qd, *J* = 12.8, 3.7 Hz, 3H).

**<sup>13</sup>C NMR:** <sup>13</sup>C NMR (126 MHz, CDCl<sub>3</sub>) δ 173.29, 44.14, 39.83, 39.24, 38.40, 37.37, 34.43, 33.10, 31.83, 31.61, 29.86, 28.30, 28.08, 27.82, 26.56, 26.24.

**HRMS-ESI** (positive): *M* = C<sub>22</sub>H<sub>27</sub>NO, calculated (*M*+*H*) *m/z*: 332.2953, found: 332.2964

**Purification:** elutes at 10% EtOAc

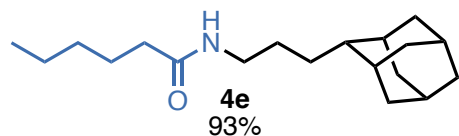

White solid

**<sup>1</sup>H NMR:** (500 MHz, CDCl<sub>3</sub>) δ 5.42 (br s, 1H), 3.27 (q, *J* = 6.5 Hz, 2H), 2.17 (t, *J* = 7.6 Hz, 2H), 1.92 – 1.77 (m, 6H), 1.75 – 1.59 (m, 9H), 1.55 – 1.41 (m, 6H), 1.33 (hd, *J* = 8.8, 4.7 Hz, 4H), 0.92 (t, *J* = 6.8 Hz, 3H).

**<sup>13</sup>C NMR:** (126 MHz, CDCl<sub>3</sub>) δ 173.01, 44.14, 39.81, 39.24, 38.39, 36.96, 31.83, 31.61, 31.50, 29.87, 28.30, 28.07, 27.84, 25.56, 22.44, 13.95.

**HRMS-ESI** (positive): *M* = C<sub>19</sub>H<sub>33</sub>NO, calculated (*M*+*H*) *m/z*: 292.2640, found: 292.2655

**Purification:** elutes at 10% EtOAc

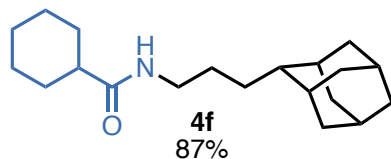

White solid

**<sup>1</sup>H NMR:** (500 MHz, CDCl<sub>3</sub>) δ 5.43 (br s, 1H), 3.26 (td, *J* = 6.9, 5.6 Hz, 2H), 2.07 (tt, *J* = 11.8, 3.5 Hz, 1H), 1.94 – 1.77 (m, 10H), 1.76 – 1.61 (m, 8H), 1.56 – 1.37 (m, 8H), 1.35 – 1.17 (m, 3H).

**<sup>13</sup>C NMR:** (126 MHz, CDCl<sub>3</sub>) δ 175.95, 45.70, 44.12, 39.64, 39.24, 38.40, 31.82, 31.61, 29.85, 29.79, 28.30, 28.07, 27.84, 25.79.

**HRMS-ESI** (positive): *M* = C<sub>17</sub>H<sub>33</sub>NO, calculated (*M*+*H*) *m/z*: 268.2640, found: 268.2620

**Purification:** elutes at 10% EtOAc

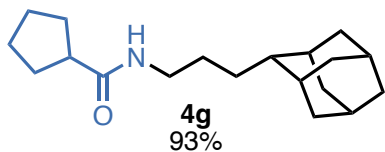

White solid

**<sup>1</sup>H NMR:** (500 MHz, CDCl<sub>3</sub>) δ 5.45 (br s, 1H), 3.31 – 3.23 (m, 2H), 2.51 (p, *J* = 7.9 Hz, 1H), 1.86 (m, 6H), 1.82 – 1.67 (m, 11H), 1.64 (m, 2H), 1.59 (m, 2H), 1.55 – 1.40 (m, 6H).

**<sup>13</sup>C NMR:** (126 MHz, CDCl<sub>3</sub>) δ 176.07, 46.05, 44.12, 39.83, 39.24, 38.40, 31.82, 31.61, 30.49, 29.86, 28.30, 28.07, 27.86, 25.92.

**HRMS-ESI** (positive): *M* = C<sub>19</sub>H<sub>31</sub>NO, calculated (*M*+*H*) *m/z*: 290.2484, found: 290.1592

**Purification:** elutes at 10% EtOAc

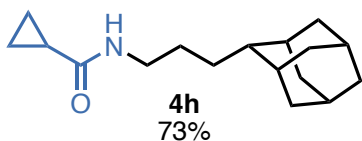

White solid

**<sup>1</sup>H NMR:** (500 MHz, CDCl<sub>3</sub>) δ 5.60 (br s, 1H), 3.29 (td, *J* = 6.9, 5.7 Hz, 2H), 1.92 – 1.78 (m, 6H), 1.76 – 1.62 (m, 7H), 1.58 – 1.42 (m, 6H), 1.33 (tt, *J* = 7.9, 4.6 Hz, 1H), 1.02 – 0.95 (m, 2H), 0.79 – 0.69 (m, 2H).

**<sup>13</sup>C NMR:** (126 MHz, CDCl<sub>3</sub>) δ 173.34, 44.15, 40.12, 39.25, 38.40, 31.83, 31.61, 29.88, 28.31, 28.08, 27.89, 14.82, 6.97.

**HRMS-ESI** (positive): *M* = C<sub>17</sub>H<sub>27</sub>NO, calculated (*M*+*H*) *m/z*: 262.2171, found: 262.9264

**Purification:** elutes at 10% EtOAc

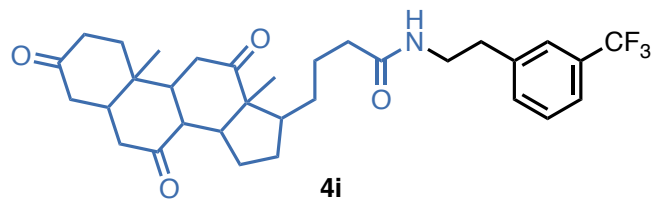

**4i**  
50%  
from dehydrocholic acid

Colorless oil

**<sup>1</sup>H NMR:** (500 MHz, CDCl<sub>3</sub>) δ 5.45 (br t, 1H), 3.55 (td, *J* = 7.0, 5.9 Hz, 2H), 3.04 – 2.77 (m, 5H), 2.44 – 2.20 (m, 7H), 2.19 – 1.94 (m, 8H), 1.91 – 1.82 (m, 2H), 1.69 – 1.60 (m, 1H), 1.42 (s, 3H), 1.41 – 1.23 (m, 4H), 1.09 (s, 3H), 0.86 (d, *J* = 6.5 Hz, 3H).

**<sup>13</sup>C NMR:** (126 MHz, CDCl<sub>3</sub>) δ 212.02, 209.01, 208.67, 173.33, 139.91, 132.18, 130.87 (q), 129.07, 125.51, 123.44, 56.92, 51.77, 49.00, 46.86, 45.58, 44.99, 42.80, 40.41, 38.64, 36.49, 36.03, 35.60, 35.48, 35.30, 33.61, 31.08, 27.56, 25.14, 21.92, 18.74, 11.88.

**HRMS-ESI** (positive): *M* = C<sub>33</sub>H<sub>42</sub>F<sub>3</sub>NO<sub>4</sub>, calculated (*M*+*H*) *m/z*: 574.3144, found: 574.3136

**Purification:** elutes at 10% EtOAc

## 6. Mechanistic Studies

### Observation of the Rhodium Hydride

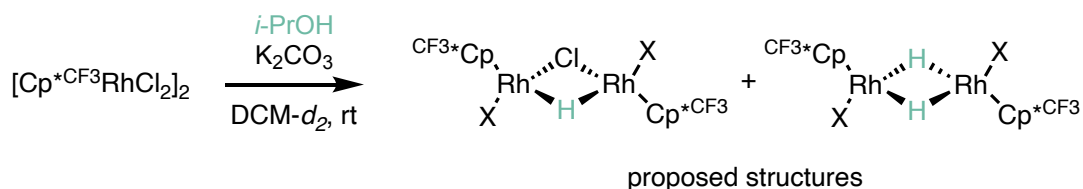

$[\text{Cp}^*\text{CF}_3\text{RhCl}_2]_2$  (14.4 mg, 0.02 mmol) and  $\text{K}_2\text{CO}_3$  (60.8 mg, 0.44 mmol) were weighed into a 1.5-dram vial with magnetic stir bar. Into another 1.5-dram vial were pipetted isopropanol (100  $\mu\text{L}$ ) and  $\text{DCM-}d_2$  (400  $\mu\text{L}$ ). The solvents were transferred to the vial containing the solvents, and the solution was stirred for one minute, before being pipetted into an NMR tube. A standard  $^1\text{H}$  NMR spectrum was then taken, revealing two distinct triplets in a 3:1 ratio at -11.18 -11.32 ppm respectively ( $J = 20$  Hz). This ppm range is characteristic of  $\text{Cp}^*$  rhodium hydride species.<sup>21</sup>

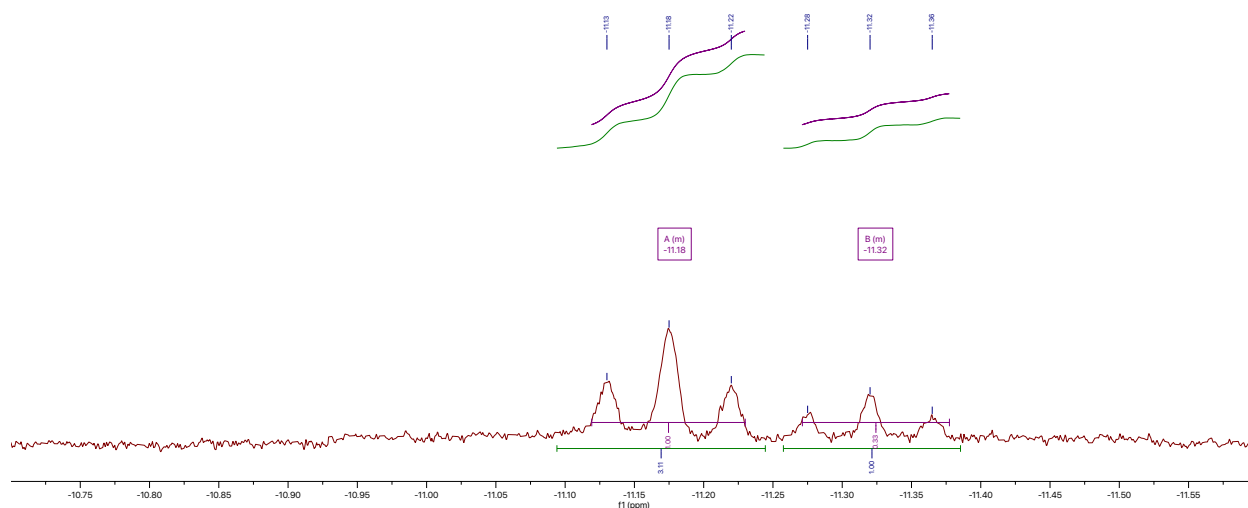

Given that rhodium is spin  $\frac{1}{2}$ , we believe that the triplet signal observed may correspond to a rhodium dimer complex with a bridging hydride ligand.<sup>22</sup> Further, we believe that both the mono- and dihydride complexes can be formed, explaining the presence of two triplet signals with the same coupling constant in an unequal ratio.

After 20 hours, a second  $^1\text{H}$  NMR spectrum was taken of the same sample, and the rhodium hydride signal was still observed. The ratio of the two triplets had increased from 3:1 to 11:1, indicating equilibration of some kind. If we are correct that these signals belong to the mono- and dihydrides, it is likely that over time, one is converted to the other due to a difference in thermodynamic stability.

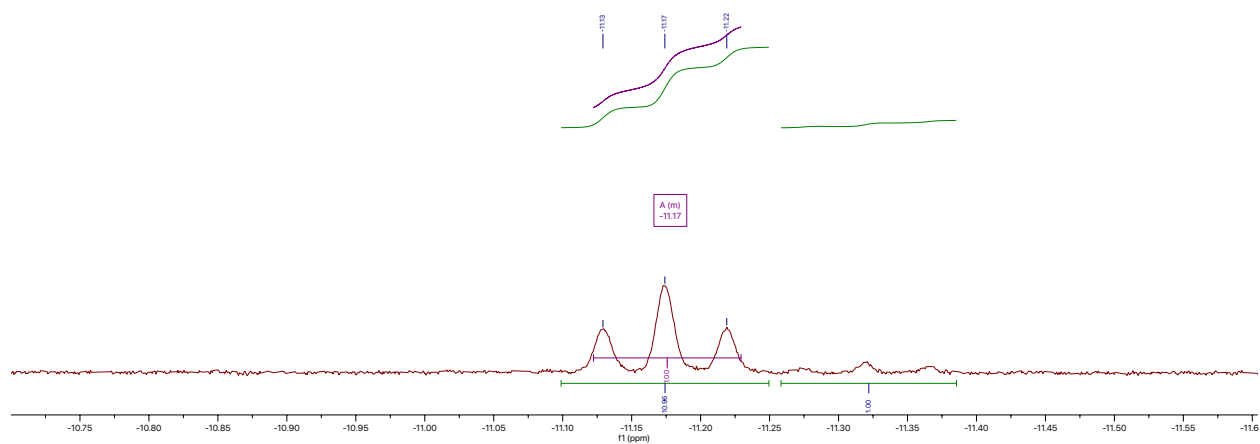

Additional experiments on solutions containing this rhodium hydride species were performed to see if it is the active catalyst in the hydroamidation reaction. Although adding alkene and dioxazolone to the solution and stirring for one hour resulted in 28% yield of the hydroamidation product, this just demonstrates that the solution is catalytically active, and does not necessarily point to the observed complex being active. In fact, further experiments suggest that this species is not catalytically active.

First, we formed the rhodium deuteride in the same way that we formed the hydride, using isopropanol- $d_8$ , then adding 1-decene to the solution, but no rhodium hydride signal was observed, indicating that proton-deuteron exchange does not occur. Additionally, when treating the rhodium hydride with alkene, dioxazolone, or both, consumption or change of the rhodium hydride signal was not observed. Finally, when we attempted to form the rhodium hydride species in the presence of alkene (adding 1-decene alongside isopropanol and  $\text{DCM-}d_2$ ), we did not observe the rhodium hydride signal. Based on these experiments, we conclude that the observed rhodium hydride species is not an active species under the reaction conditions, however its observation is evidence that a rhodium hydride can be formed with isopropanol and  $\text{K}_2\text{CO}_3$ .

In search of further evidence that a rhodium hydride is active under our conditions, we formed a rhodium hydride complex stoichiometrically by adding 0.9 equivalents of  $\text{Et}_3\text{SiH}$  to  $[\text{Cp}^*\text{CF}_3\text{RhCl}_2]_2$  in  $\text{DCM-}d_2$ . By  $^1\text{H}$  NMR, we observe multiple different rhodium hydride resonances. First, we observe the same pair of triplet signals discussed above. Farther upfield, a small doublet at -12.45 ppm ( $J = 30$  Hz), which we believe to be a rhodium monohydride species,<sup>21</sup> then a similar doublet at -13.92 ppm ( $J = 35$  Hz) that might be a dihydride based on the shift further upfield<sup>23</sup> and coupling constant that are similar to those of the large doublet at -14.39 ppm ( $J = 35$  Hz). When we performed the same experiment with 9 equivalents of silane, this large doublet was the only hydride species observed, and in that experiment, we were able to get relative integrations of the hydride to  $\text{Cp}^*\text{CF}_3$  methyl peaks in a 2:6 ratio, indicative of a dihydride.

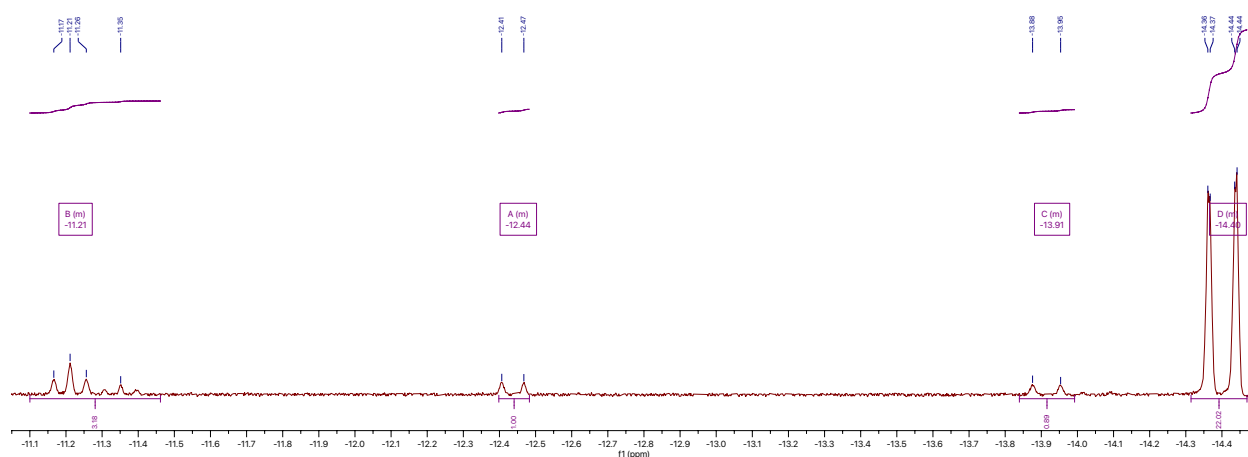

Adding alkene and dioxazolone to this solution and stirring for 15 minutes, we see consumption of the signal tentatively assigned as the monohydride, while the other rhodium hydride signals remain intact. The hydroamidation product is concurrently formed in trace yield. Based on this, we suggest that only the rhodium monohydride is catalytically active, while the predominant dihydride species are not.

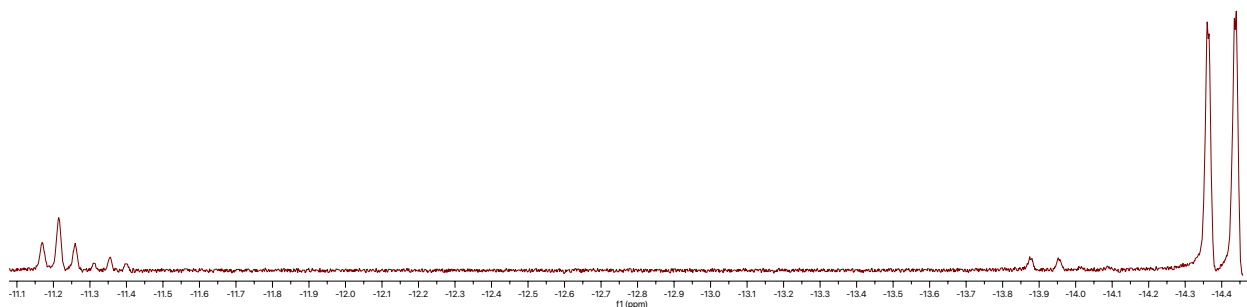

To test the capability of  $\text{Et}_3\text{SiH}$  as a hydride donor under catalytic conditions, we subjected 1-decene to the standard conditions with  $\text{Et}_3\text{SiH}$  in lieu of isopropanol, and obtained the hydroamidated product in 6% yield. This supports the proposed mechanism of rhodium hydride formation as the first catalytic step. The low yield may be due to catalyst deactivation by formation of inactive dihydride species, as was observed in the stoichiometric experiments. If this is the case, slower hydride generation from isopropanol may be optimal to form active rhodium monohydride species that can react with the substrate before forming an inactive dihydride.

### Formation of Rhodium Hydride from Isopropanol

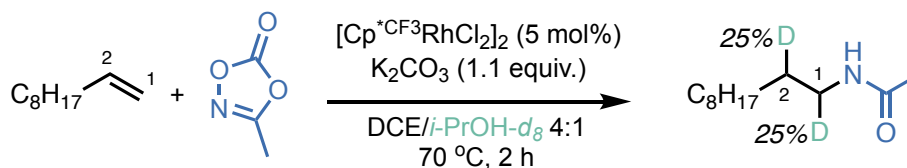

Using the standard reaction conditions but substituting isopropanol- $d_8$  for regular isopropanol resulted in full deuterium incorporation in the product, supporting the notion that isopropanol acts as the hydride donor in this reaction.

The fact that the deuterium incorporation is evenly distributed between C<sub>1</sub> and C<sub>2</sub> yields additional mechanistic information, suggesting that rhodium hydride migratory insertion into the alkene is both reversible and non-regioselective.

### Reversibility of Migratory Insertion

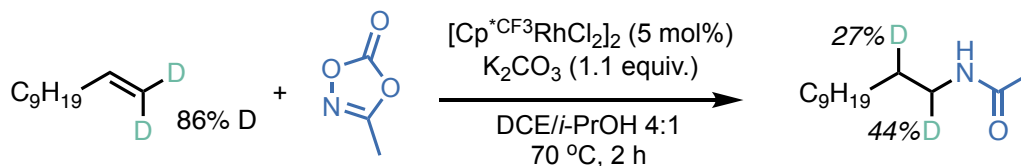

To further test the reversibility of the migratory insertion step we subjected 1-undecene deuterated at the 1 position to the standard conditions and observed that a significant amount of deuterium had moved from carbon 1 to carbon 2. This is consistent with a reversible migratory insertion step, in which a rhodium hydride may insert to yield a secondary alkylrhodium species. This can then undergo  $\beta$ -deuteride elimination and reinsertion to yield the terminal alkylrhodium species which can then be amidated, resulting in the formation of a product in which deuterium has shifted from the 1-carbon to the 2-carbon.

### Reversibility of Alkene Coordination

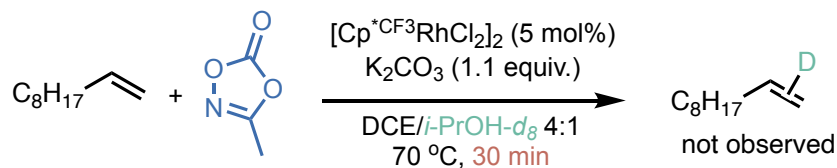

To test the reversibility of alkene coordination, we subjected 1-decene to the standard conditions using deuterated isopropanol. We stopped the reaction after just 30 minutes and reisolated remaining starting material. We were unable to detect any deuterium incorporation in the reisolated alkene, suggesting that the alkene coordination step is irreversible.

### Kinetic Isotope Effect on Rhodium Hydride Formation

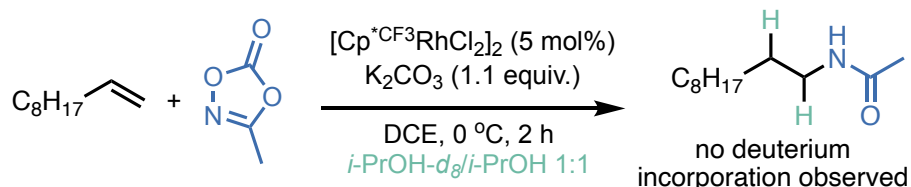

When employing a 1:1 mixture of isopropanol and isopropanol- $d_8$ , we were surprised to observe no detectable deuterium incorporation in the product. This suggests a very strong primary KIE on the initial formation of the rhodium hydride species.

### Turnover-Limiting Amidation Step

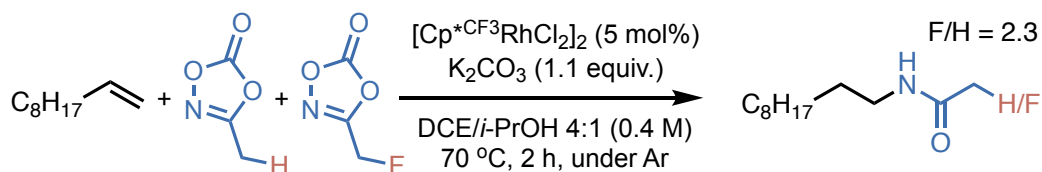

To determine which step of the amidation is likely to be turnover limiting, we conducted a competition experiment between the standard methyl dioxazolone and the fluoromethyl dioxazolone. Due to inductive effects of the added fluorine atom, the fluoromethyl dioxazolone is both less coordinating and more oxidizing than the methyl dioxazolone. Subjecting 1-decene to the standard conditions with 2.5 equiv. of methyl dioxazolone and 2.5 equiv. of fluoromethyl dioxazolone yielded a mixture of hydroamidated products with a 2.3:1 ratio of fluorinated to nonfluorinated products, meaning that the fluoromethyl dioxazolone outcompetes the methyl dioxazolone. We conclude that dioxazolone coordination is not turnover-limiting, since if that were the case, we would see the more coordinating methyl dioxazolone outcompete the fluoromethyl one. Additionally, this result suggests that dioxazolone activation to form the rhodium nitrenoid species is turnover-limiting, as the more easily activated fluoromethyl dioxazolone outcompetes the methyl one.

## 7. Unsuccessful Substrates

This section discloses substrates that were incompatible with the method, giving either no or low yield.

### Incompatible Alkenes

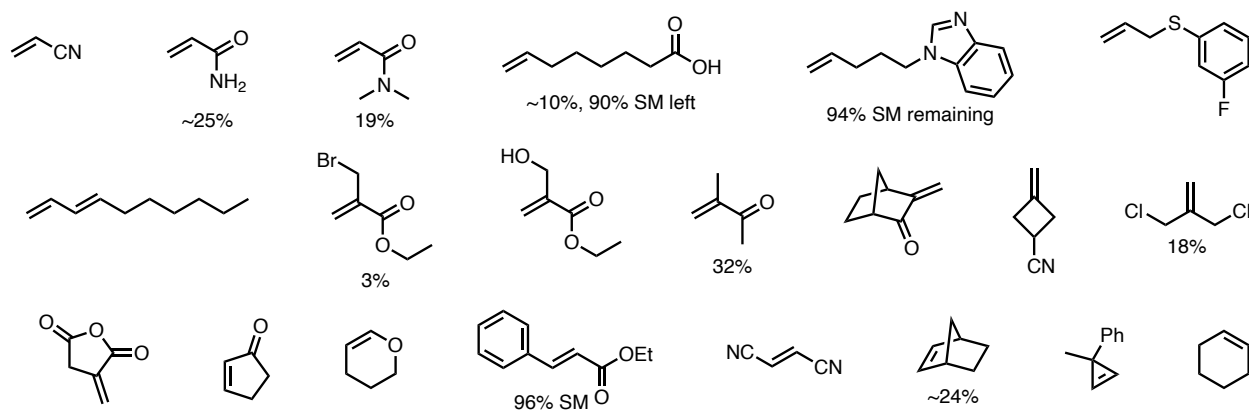



## Incompatible Dioxazolones

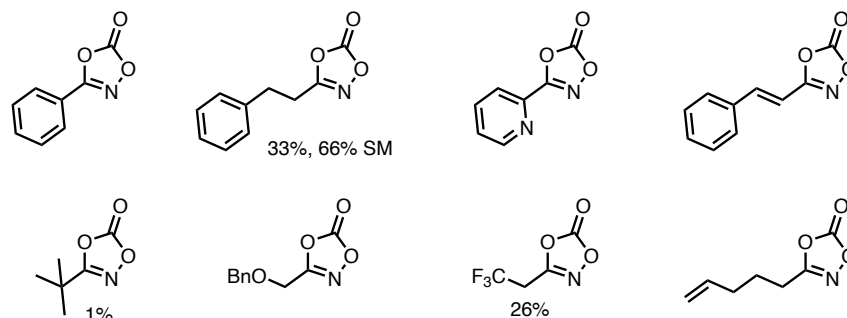

## 8. References

- (1) Phipps, E. J. T.; Rovis, T. Rh(III)-Catalyzed C–H Activation-Initiated Directed Cyclopropanation of Allylic Alcohols. *J. Am. Chem. Soc.* **2019**, *141* (17), 6807–6811. <https://doi.org/10.1021/jacs.9b02156>.
- (2) Lee, S.; Rovis, T. Rh(III)-Catalyzed Three-Component Syn-Carboamination of Alkenes Using Arylboronic Acids and Dioxazolones. **2021**. <https://doi.org/10.26434/chemrxiv.14347277.v1>.
- (3) Burg, F.; Rovis, T. Diastereoselective Three-Component 3,4-Amino Oxygenation of 1,3-Dienes Catalyzed by a Cationic Heptamethylindenyl Rhodium(III) Complex. *J. Am. Chem. Soc.* **2021**, *143* (43), 17964–17969. <https://doi.org/10.1021/jacs.1c09276>.
- (4) Lee, S.; Lei, H.; Rovis, T. A Rh(III)-Catalyzed Formal [4+1] Approach to Pyrrolidines from Unactivated Terminal Alkenes and Nitrene Sources. *J. Am. Chem. Soc.* **2019**, *141* (32), 12536–12540. <https://doi.org/10.1021/jacs.9b07012>.
- (5) Brooks, J. L.; Xu, L.; Wiest, O.; Tan, D. S. Diastereoselective Synthesis of Highly Substituted Tetrahydrofurans by Pd-Catalyzed Tandem Oxidative Cyclization–Redox Relay Reactions Controlled by Intramolecular Hydrogen Bonding. *J. Org. Chem.* **2017**, *82* (1), 57–75. <https://doi.org/10.1021/acs.joc.6b02053>.
- (6) Shigehisa, H.; Aoki, T.; Yamaguchi, S.; Shimizu, N.; Hiroya, K. Hydroalkoxylation of Unactivated Olefins with Carbon Radicals and Carbocation Species as Key Intermediates. *J. Am. Chem. Soc.* **2013**, *135* (28), 10306–10309. <https://doi.org/10.1021/ja405219f>.
- (7) Rawat, V.; Chouthaiwale, P. V.; Suryavanshi, G.; Sudalai, A. A Concise Enantioselective Synthesis of (+)-Decarestrictine L via Proline-Catalyzed Sequential  $\alpha$ -Aminoxylation and Horner–Wadsworth–Emmons Olefination. *Tetrahedron Asymmetry* **2009**, *20* (18), 2173–2177. <https://doi.org/10.1016/j.tetasy.2009.08.026>.
- (8) Venning, A. R. O.; Bohan, P. T.; Alexanian, E. J. Palladium-Catalyzed, Ring-Forming Aromatic C–H Alkylations with Unactivated Alkyl Halides. *J. Am. Chem. Soc.* **2015**, *137* (11), 3731–3734. <https://doi.org/10.1021/jacs.5b01365>.
- (9) Sánchez-Cantalejo, F.; Priest, J. D.; Davies, P. W. A Gold Carbene Manifold to Prepare Fused  $\gamma$ -Lactams by Oxidative Cyclisation of Ynamides. *Chem. – Eur. J.* **2018**, *24* (65), 17215–17219. <https://doi.org/10.1002/chem.201804378>.
- (10) Yadav, J. S.; Murthy, P. V. A Concise Total Synthesis of (S)-Zearalenone and Zeranone. *Synthesis* **2011**, *2011* (13), 2117–2124. <https://doi.org/10.1055/s-0030-1260058>.
- (11) Liu, X.; Rong, X.; Liu, S.; Lan, Y.; Liu, Q. Cobalt-Catalyzed Desymmetric Isomerization of Exocyclic Olefins. *J. Am. Chem. Soc.* **2021**, *143* (49), 20633–20639. <https://doi.org/10.1021/jacs.1c11343>.
- (12) Leonardi, A.; Motta, G.; Riva, C.; Guarneri, L.; Graziani, D.; De, T. C.; Karamfilova, K. D. Novel Spiroheterocyclic Compounds as Mglu5 Antagonists. WO2012004400A1, January 12, 2012.
- (13) Bamborough, P.; Chung, C.; Furze, R. C.; Grandi, P.; Michon, A.-M.; Watson, R. J.; Mitchell, D. J.; Barnett, H.; Prinjha, R. K.; Rau, C.; Sheppard, R. J.; Werner, T.; Demont, E. H. Aiming to Miss a Moving Target: Bromo and Extra Terminal Domain (BET) Selectivity in Constrained ATAD2 Inhibitors. *J. Med. Chem.* **2018**, *61* (18), 8321–8336. <https://doi.org/10.1021/acs.jmedchem.8b00862>.

- (14) Yashin, N. V.; Markov, P. O.; Sedenkova, K. N.; Vasilenko, D. A.; Grishin, Yu. K.; Kuznetsova, T. S.; Averina, E. B. Alkyl Perchlorates in the Ritter-Type Reaction. Synthesis of N-Alkylamides. *Russ. Chem. Bull.* **2020**, *69* (5), 980–985. <https://doi.org/10.1007/s11172-020-2858-8>.
- (15) Rao, S. N.; Mohan, D. C.; Adimurthy, S. L-Proline: An Efficient Catalyst for Transamidation of Carboxamides with Amines. *Org. Lett.* **2013**, *15* (7), 1496–1499. <https://doi.org/10.1021/ol4002625>.
- (16) Langlois, M.; Bremont, B.; Shen, S.; Poncet, A.; Andrieux, J.; Sicsic, S.; Serraz, I.; Mathe-Allainmat, M.; Renard, P.; Delagrange, P. Design and Synthesis of New Naphthalenic Derivatives as Ligands for 2-[125I]Iodomelatonin Binding Sites. *J. Med. Chem.* **1995**, *38* (12), 2050–2060. <https://doi.org/10.1021/jm00012a004>.
- (17) Fernández, S.; Menéndez, E.; Gotor, V. Oxime Esters as Acylating Agents in the Aminolysis Reaction. A Simple and Chemoselective Method for the Preparation of Amides from Amino Alcohols. *Synthesis* **1991**, *1991* (09), 713–716. <https://doi.org/10.1055/s-1991-26553>.
- (18) Guo, Y.; Shao, G.; Li, L.; Wu, W.; Li, R.; Li, J.; Song, J.; Qiu, L.; Prashad, M.; Kwong, F. Y. A General Approach to the Synthesis of  $\beta$ -Amino Acid Derivatives via Highly Efficient Catalytic Asymmetric Hydrogenation of  $\alpha$ -Aminomethylacrylates. *Adv. Synth. Catal.* **2010**, *352* (9), 1539–1553. <https://doi.org/10.1002/adsc.201000122>.
- (19) Contente, M. L.; Pinto, A.; Molinari, F.; Paradisi, F. Biocatalytic N-Acylation of Amines in Water Using an Acyltransferase from *Mycobacterium Smegmatis*. *Adv. Synth. Catal.* **2018**, *360* (24), 4814–4819. <https://doi.org/10.1002/adsc.201801061>.
- (20) Manolov, S.; Nikolova, S.; Ivanov, I. Silica-Supported Polyphosphoric Acid in the Synthesis of 4-Substituted Tetrahydroisoquinoline Derivatives. *Molecules* **2013**, *18* (2), 1869–1880. <https://doi.org/10.3390/molecules18021869>.
- (21) Boyd, E. A.; Lionetti, D.; Henke, W. C.; Day, V. W.; Blakemore, J. D. Preparation, Characterization, and Electrochemical Activation of a Model [Cp\*Rh] Hydride. *Inorg. Chem.* **2019**, *58* (6), 3606–3615. <https://doi.org/10.1021/acs.inorgchem.8b02160>.
- (22) Colebrooke, S. A.; Duckett, S. B.; Lohman, J. A. B.; Eisenberg, R. Hydrogenation Studies Involving Halobis(Phosphine)–Rhodium(i) Dimers: Use of Parahydrogen Induced Polarisation To Detect Species Present at Low Concentration. *Chem. – Eur. J.* **2004**, *10* (10), 2459–2474. <https://doi.org/10.1002/chem.200305466>.
- (23) Isobe, K.; Bailey, P. M.; Maitlis, P. M. Pentamethylcyclopentadienyl-Rhodium and -Iridium Complexes. Part 30. Trimethylphosphine-Chloro-, -Acetato-, and -Hydrido-Complexes and Related Compounds of (Hexamethylbenzene)Ruthenium. *J. Chem. Soc. Dalton Trans.* **1981**, No. 9, 2003–2008. <https://doi.org/10.1039/DT9810002003>.

# 10. NMR Spectra

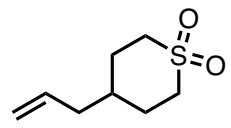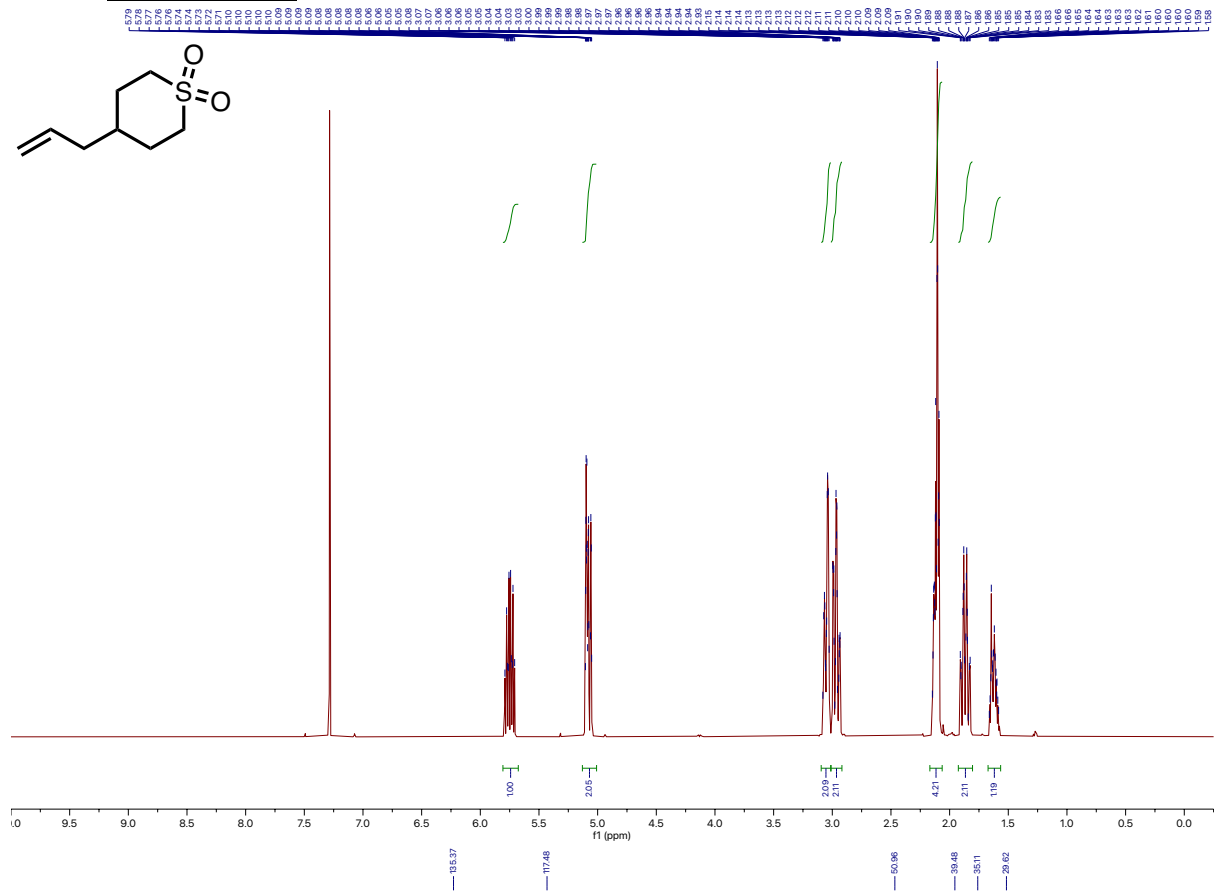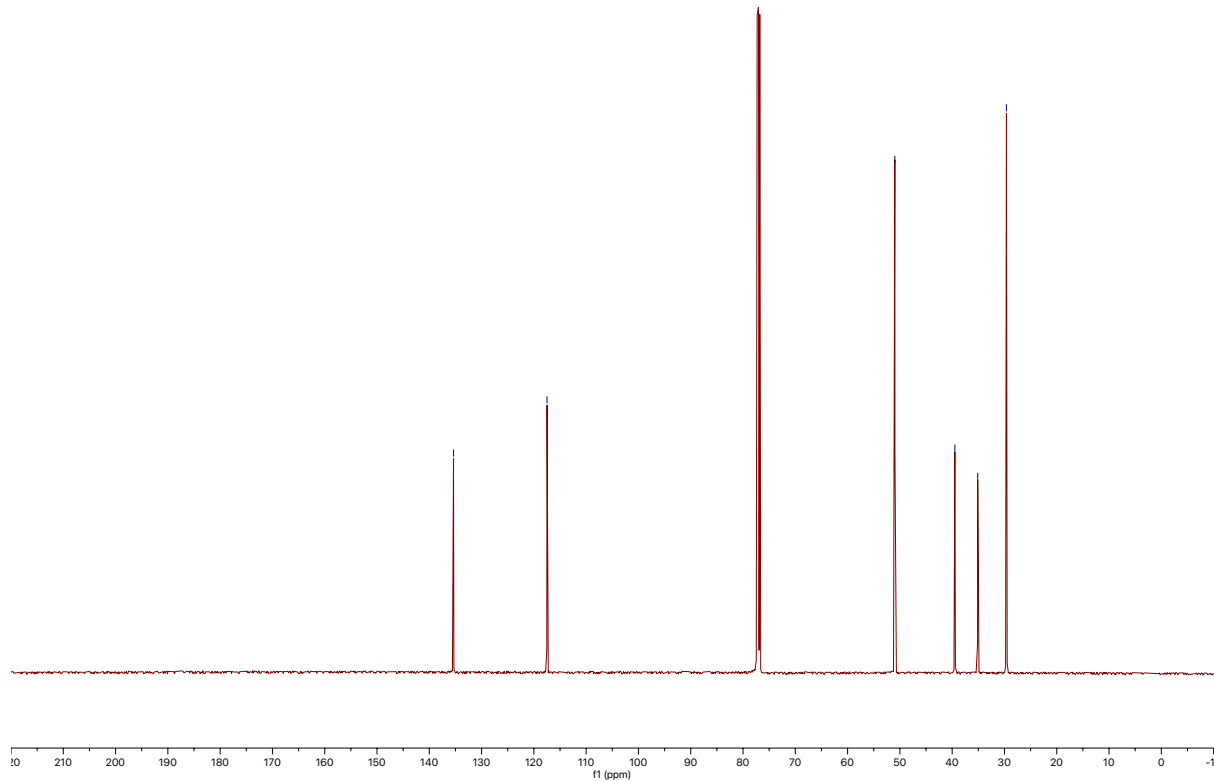

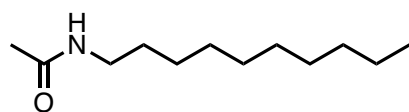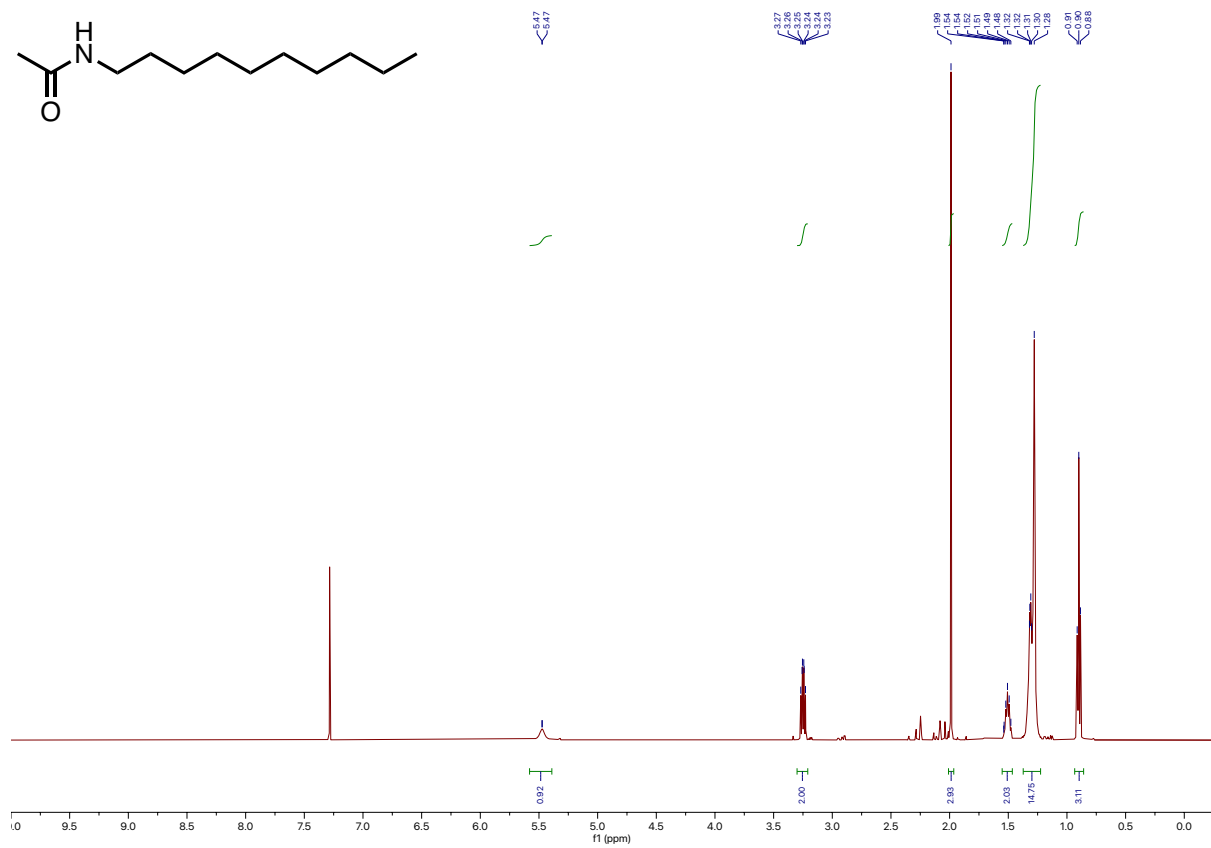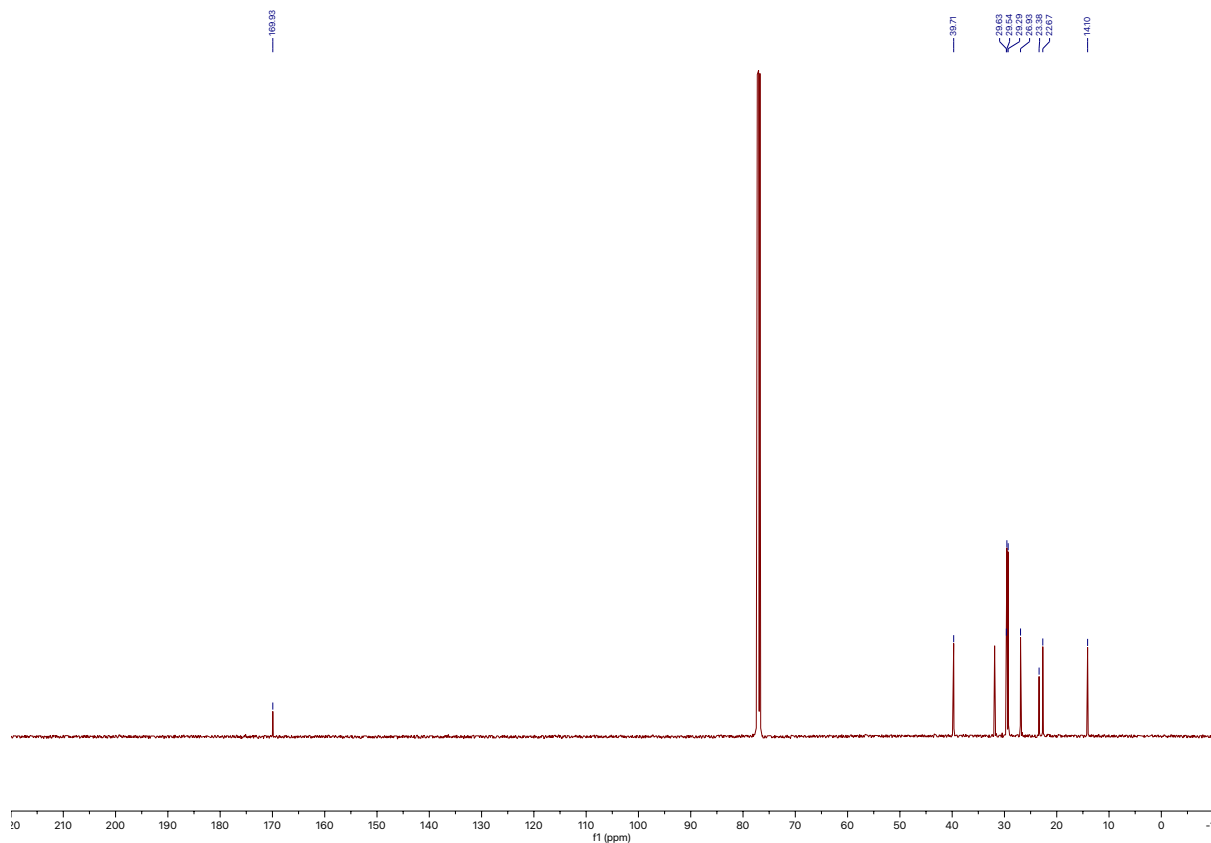



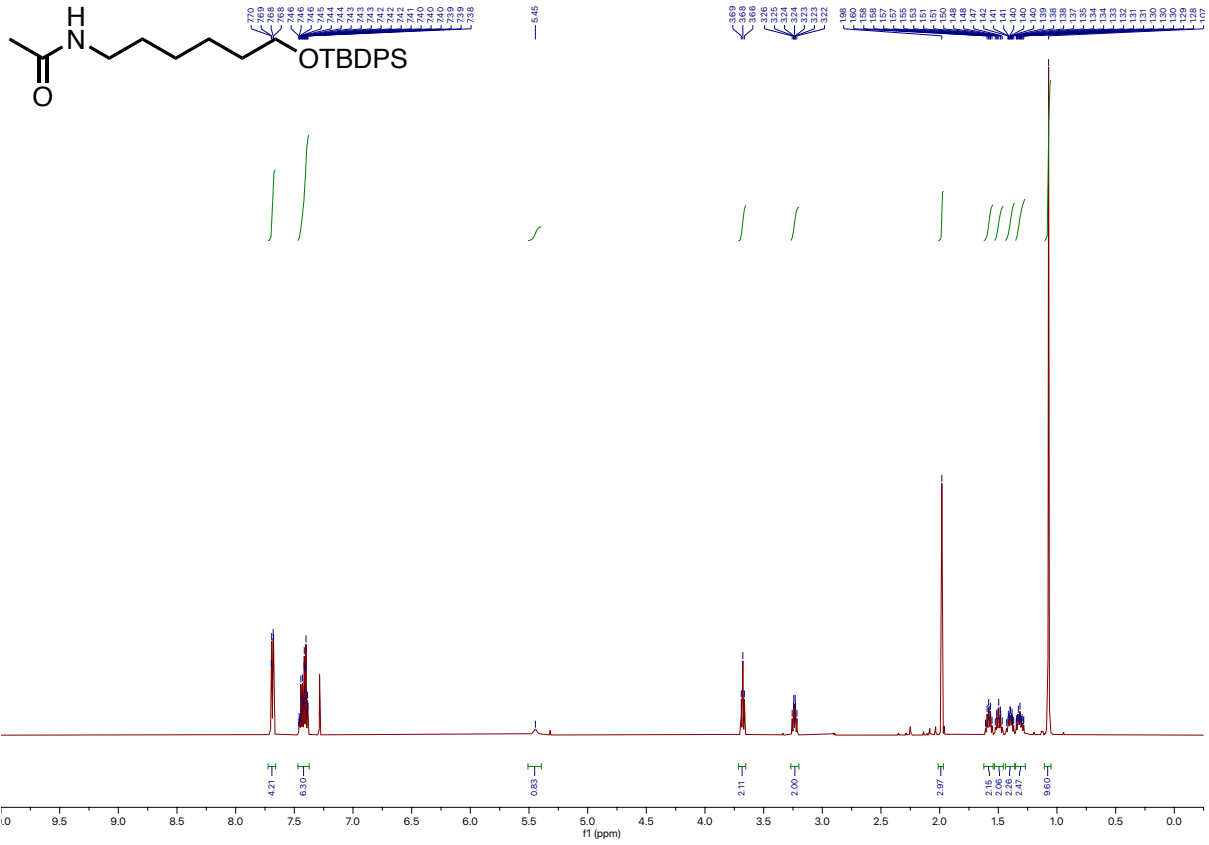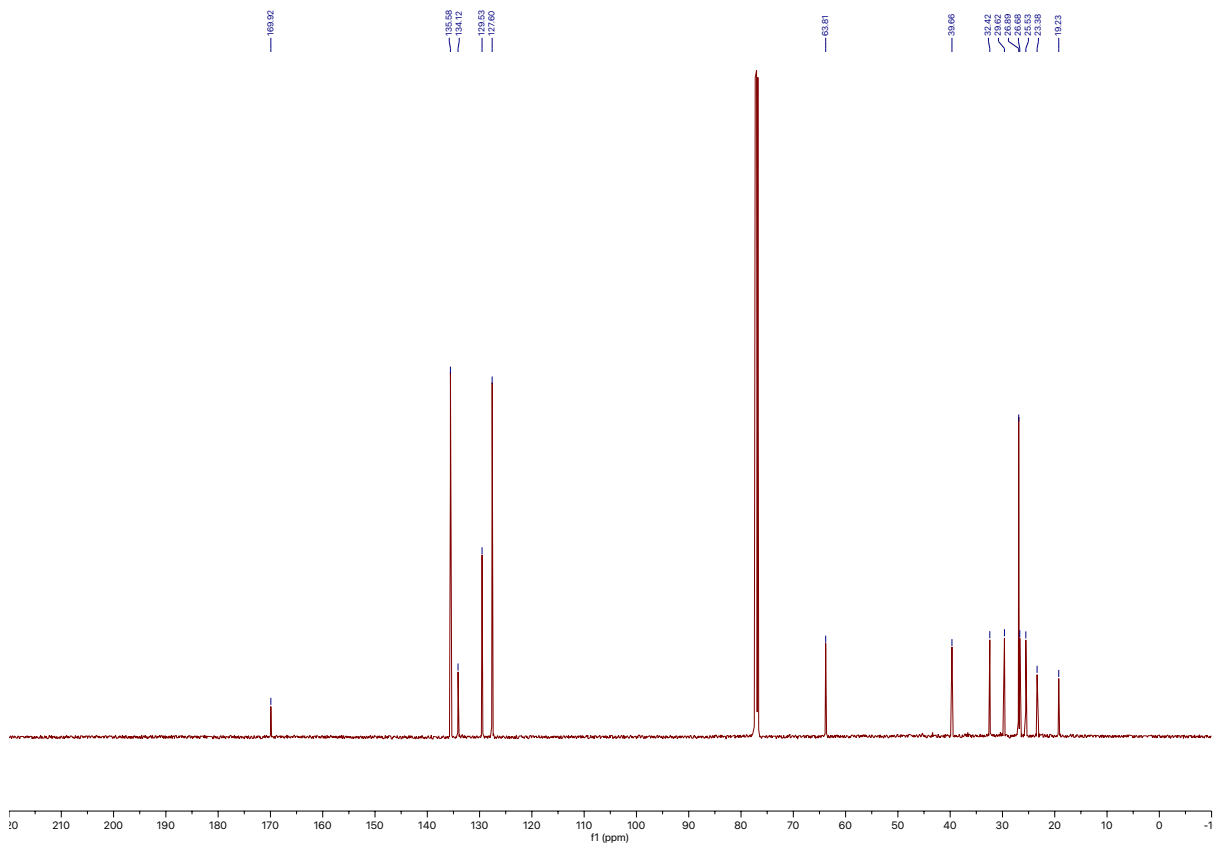

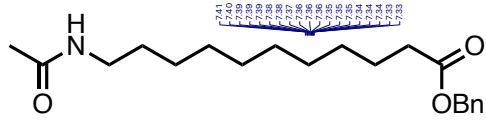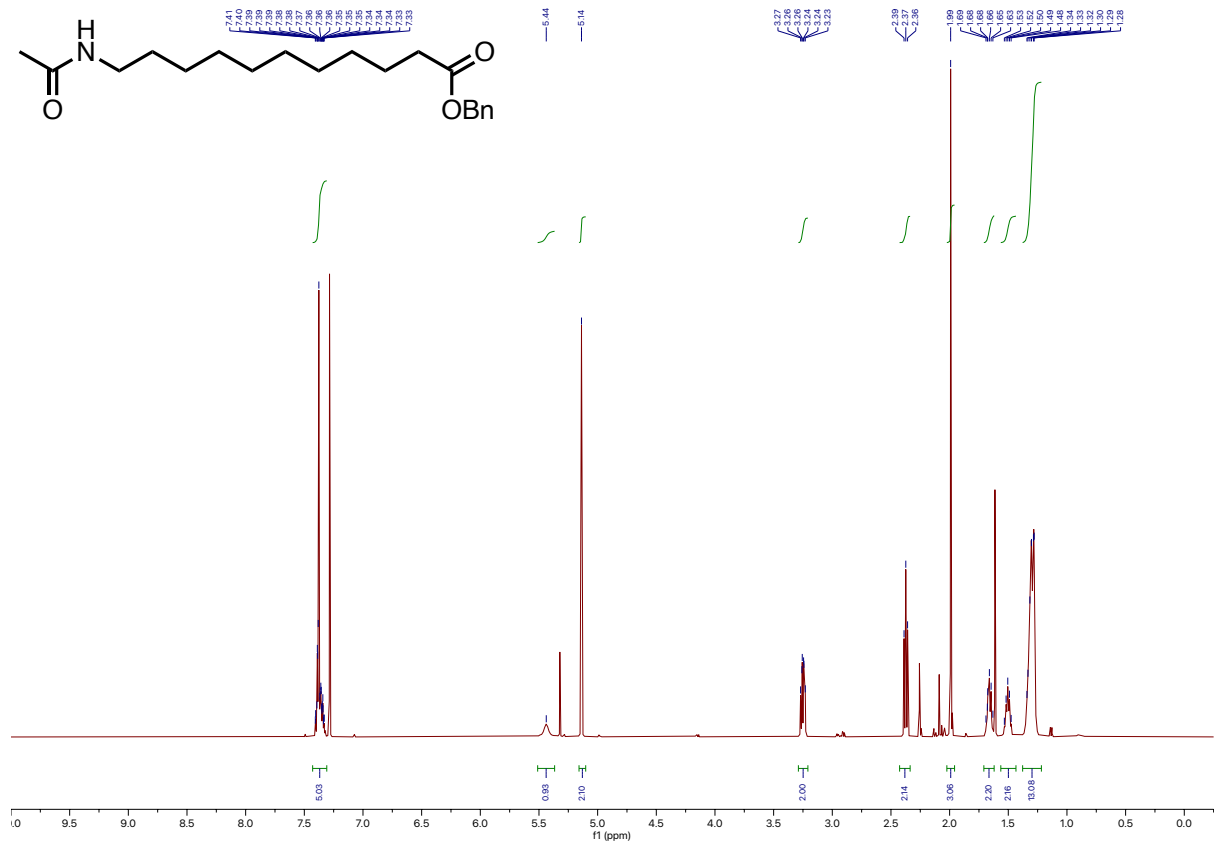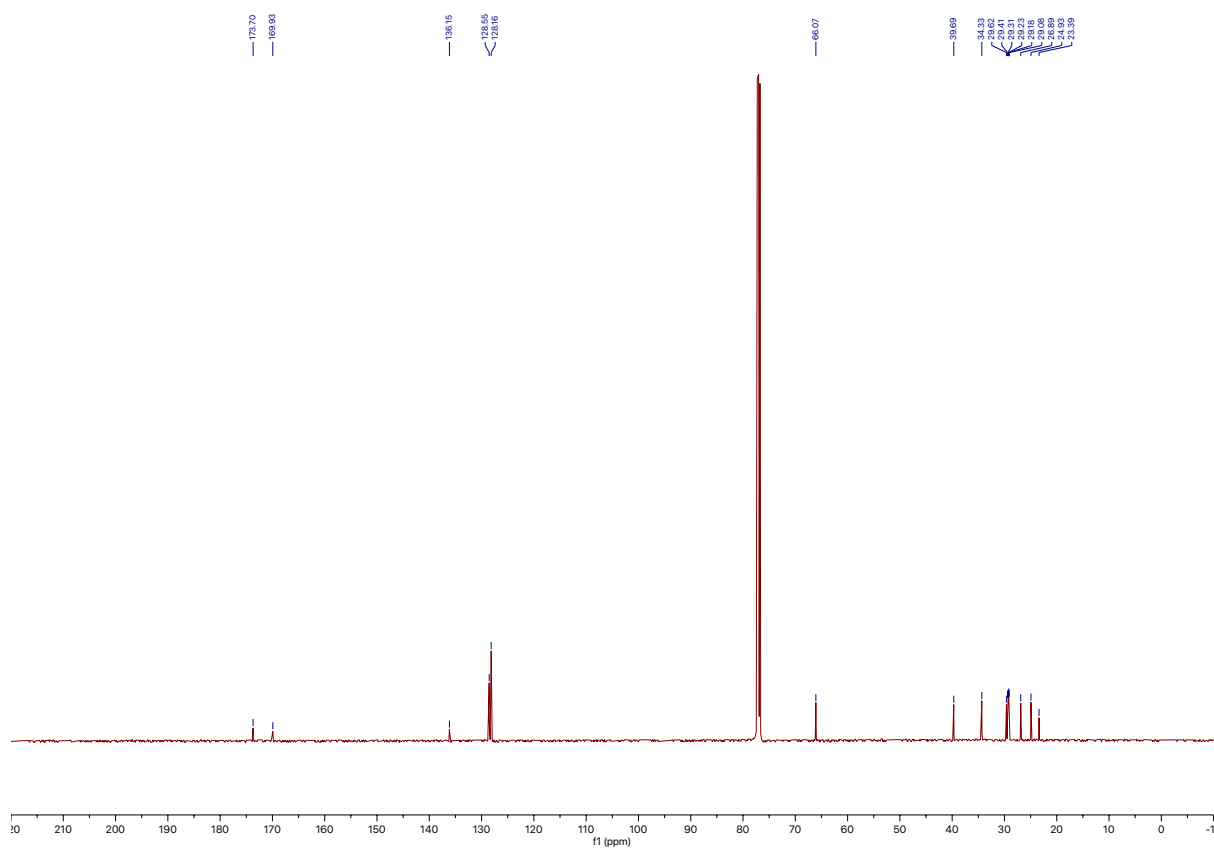

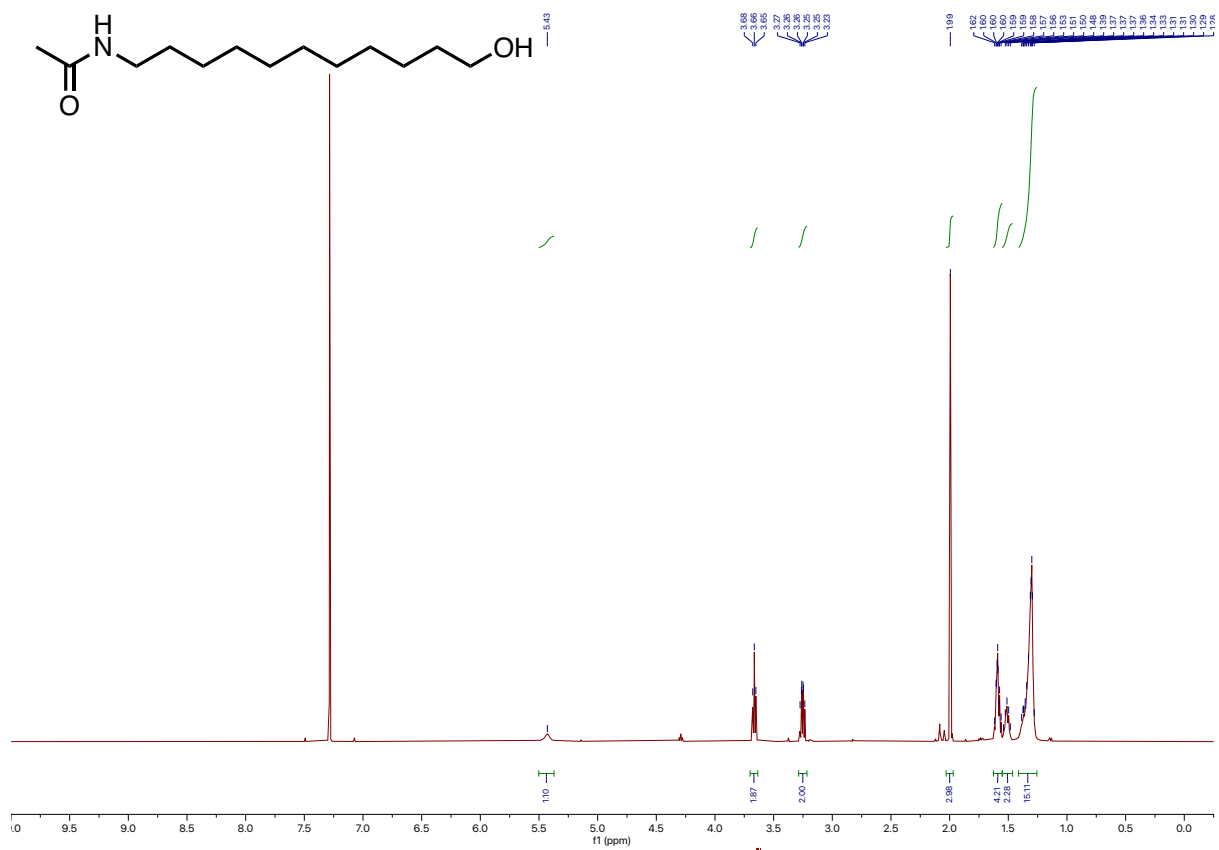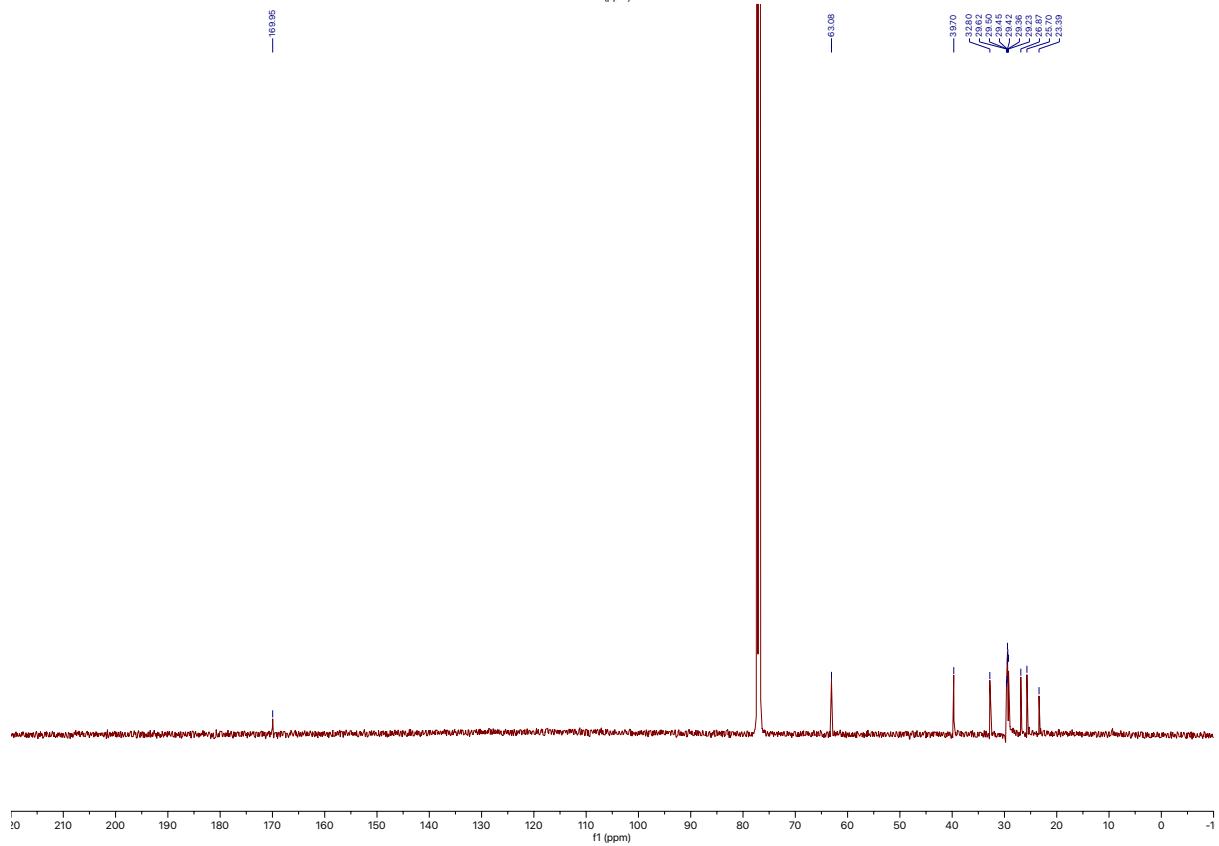



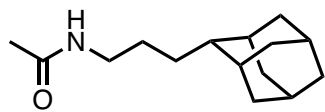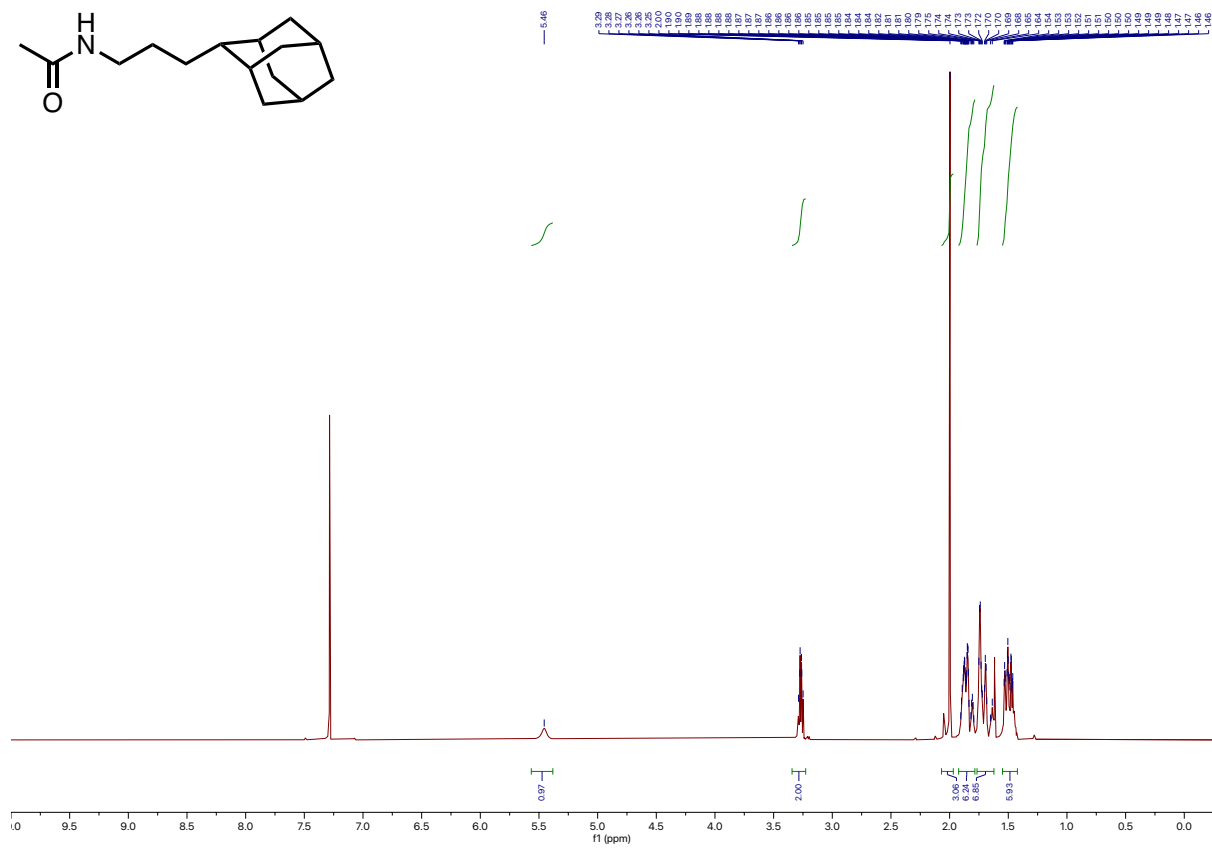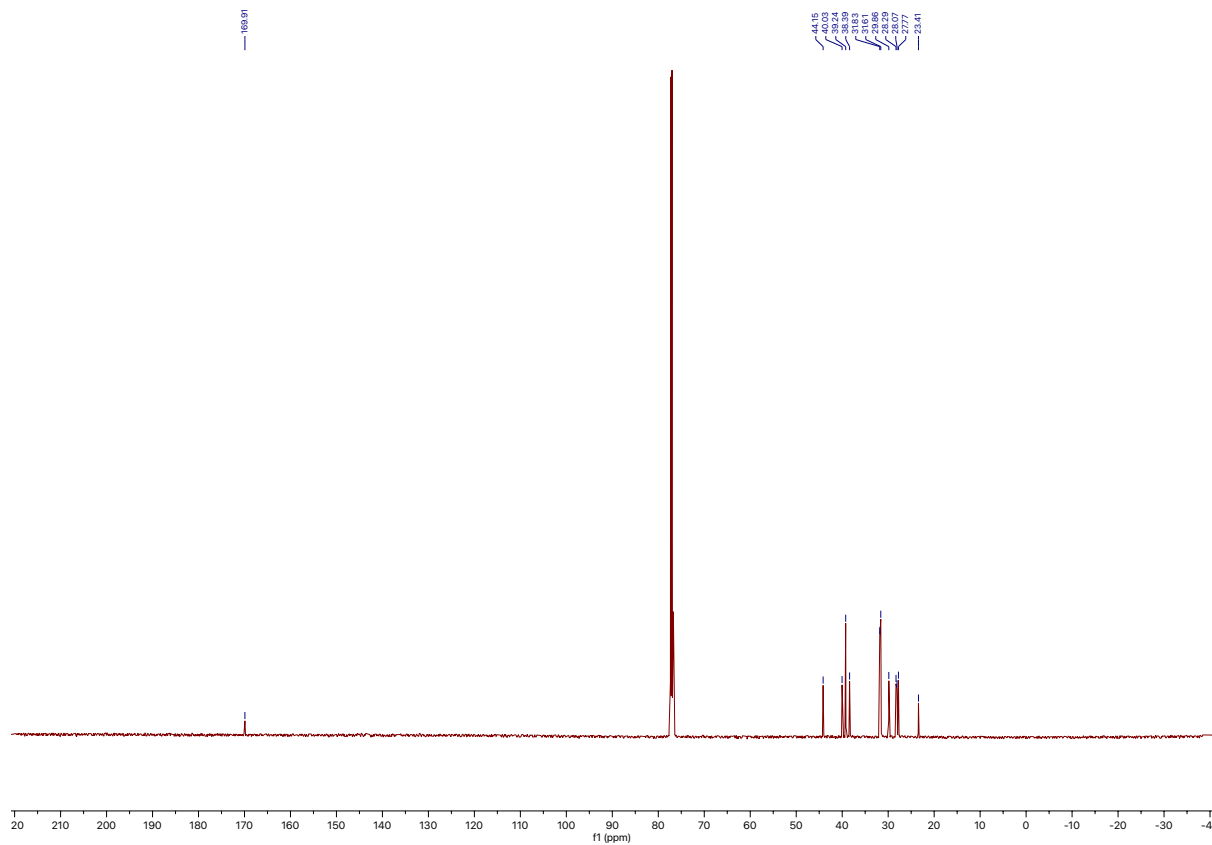

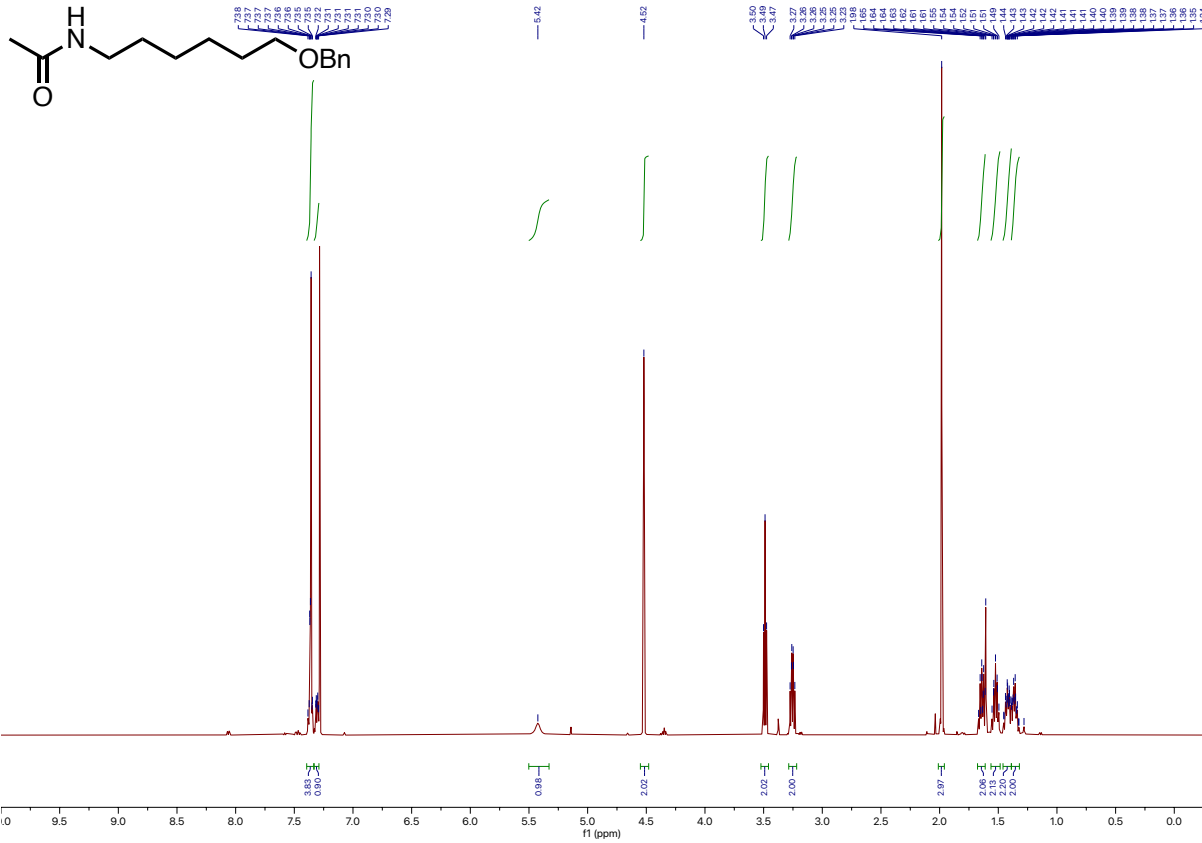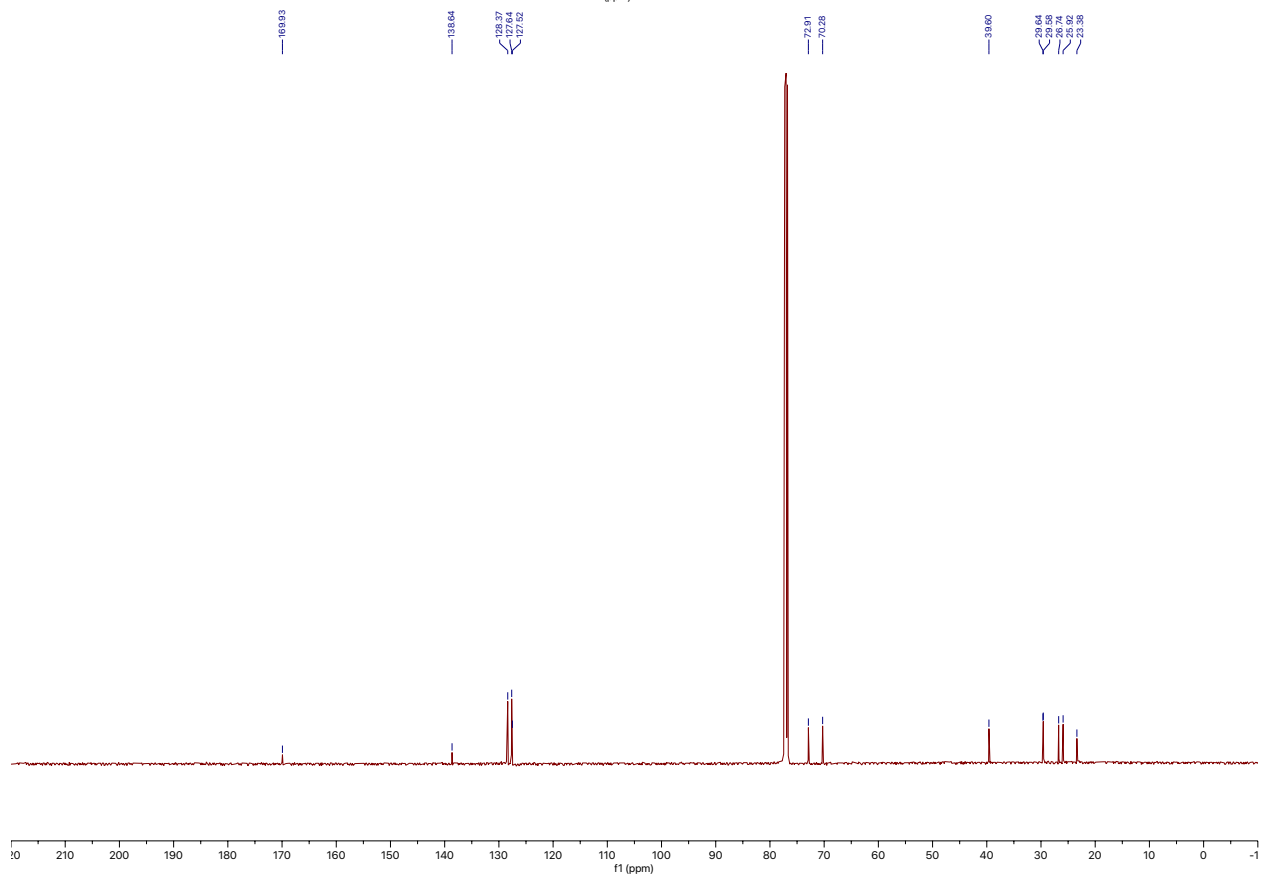

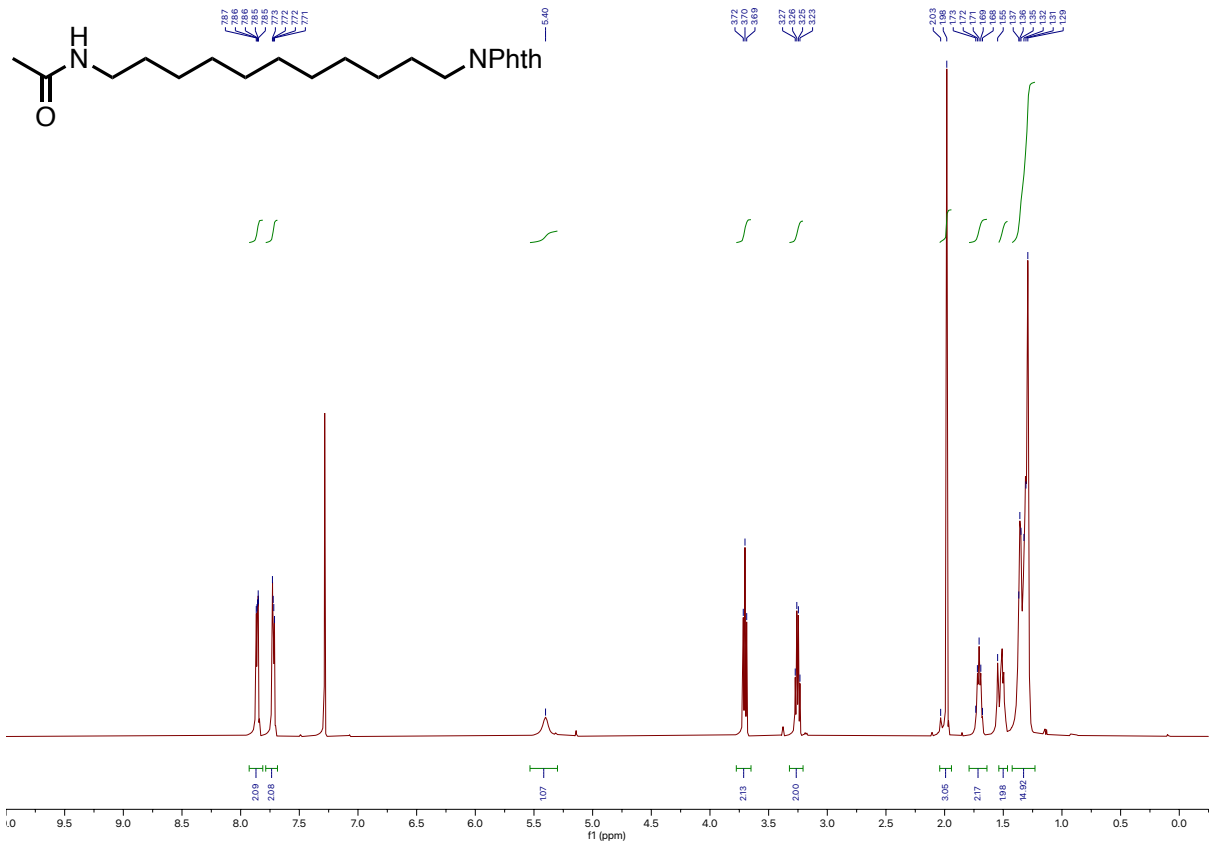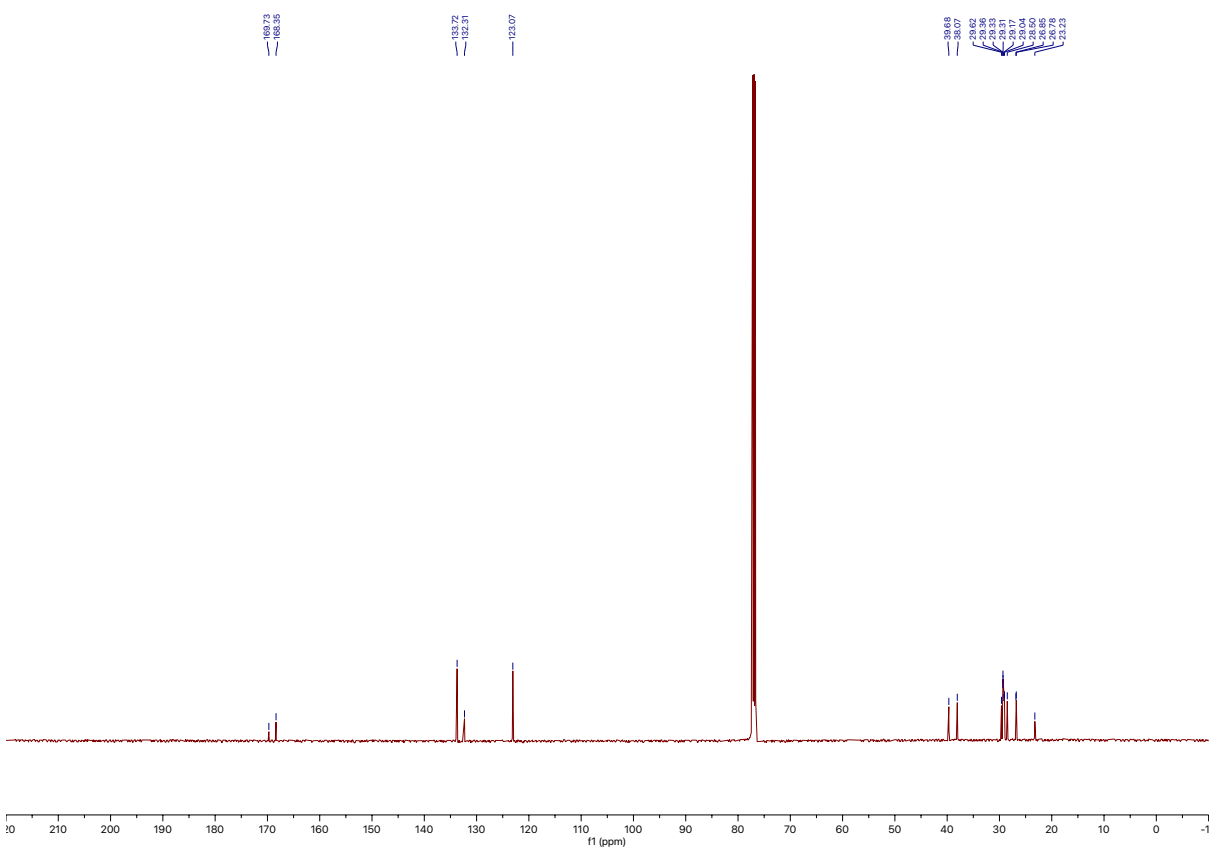

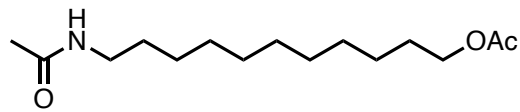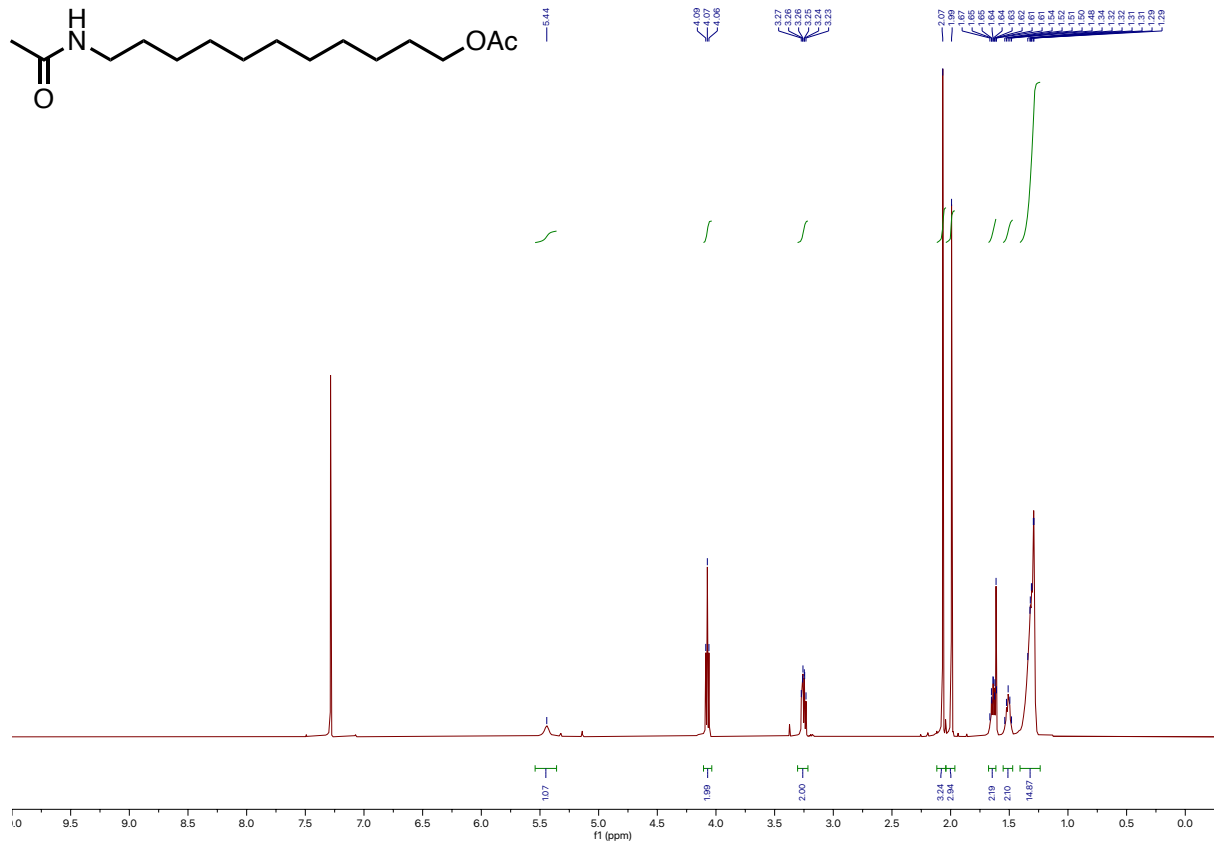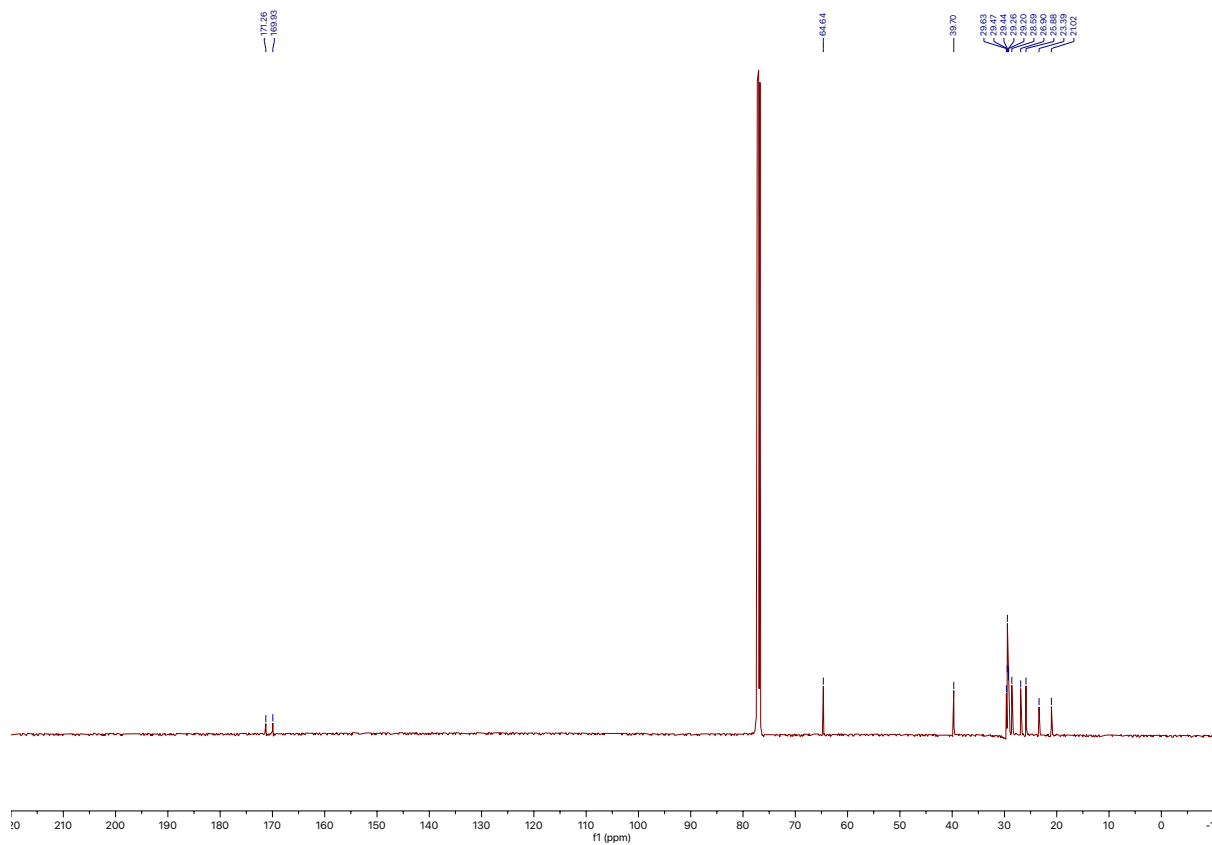



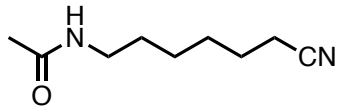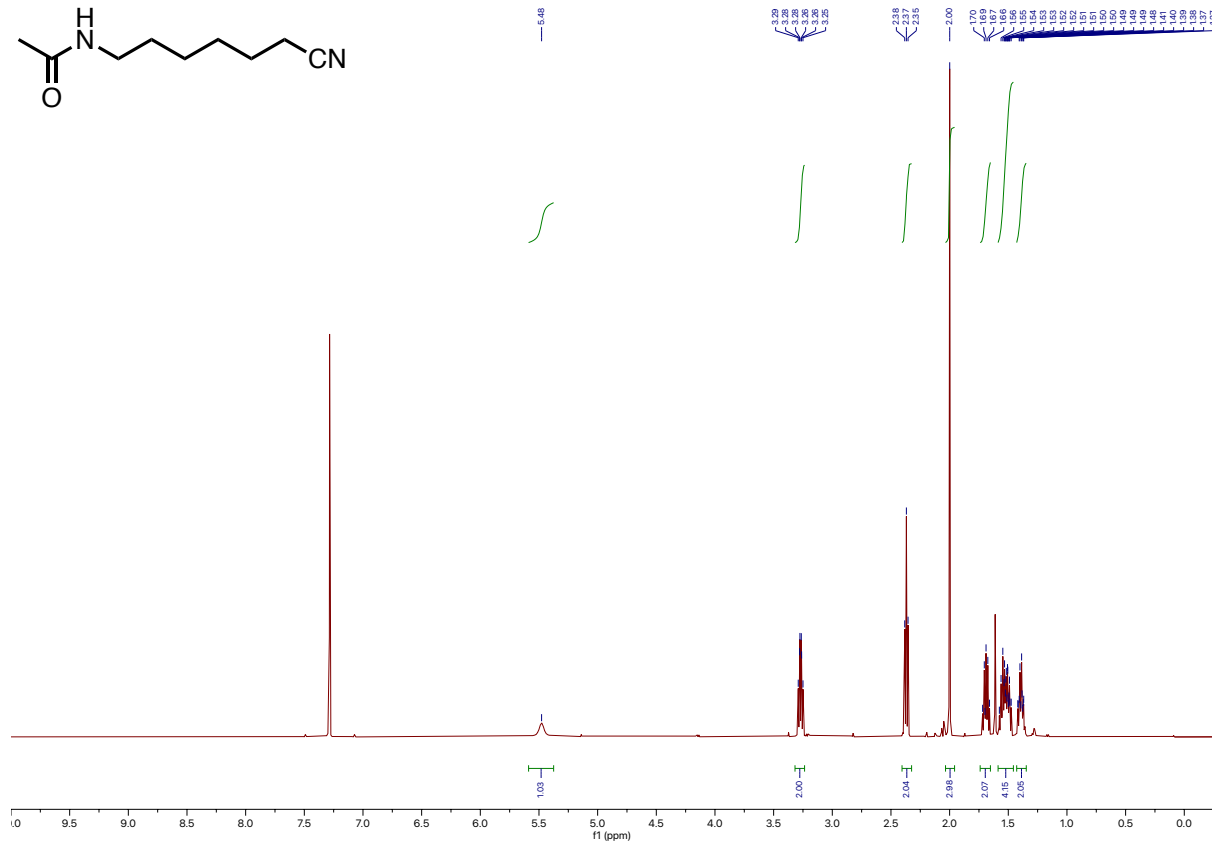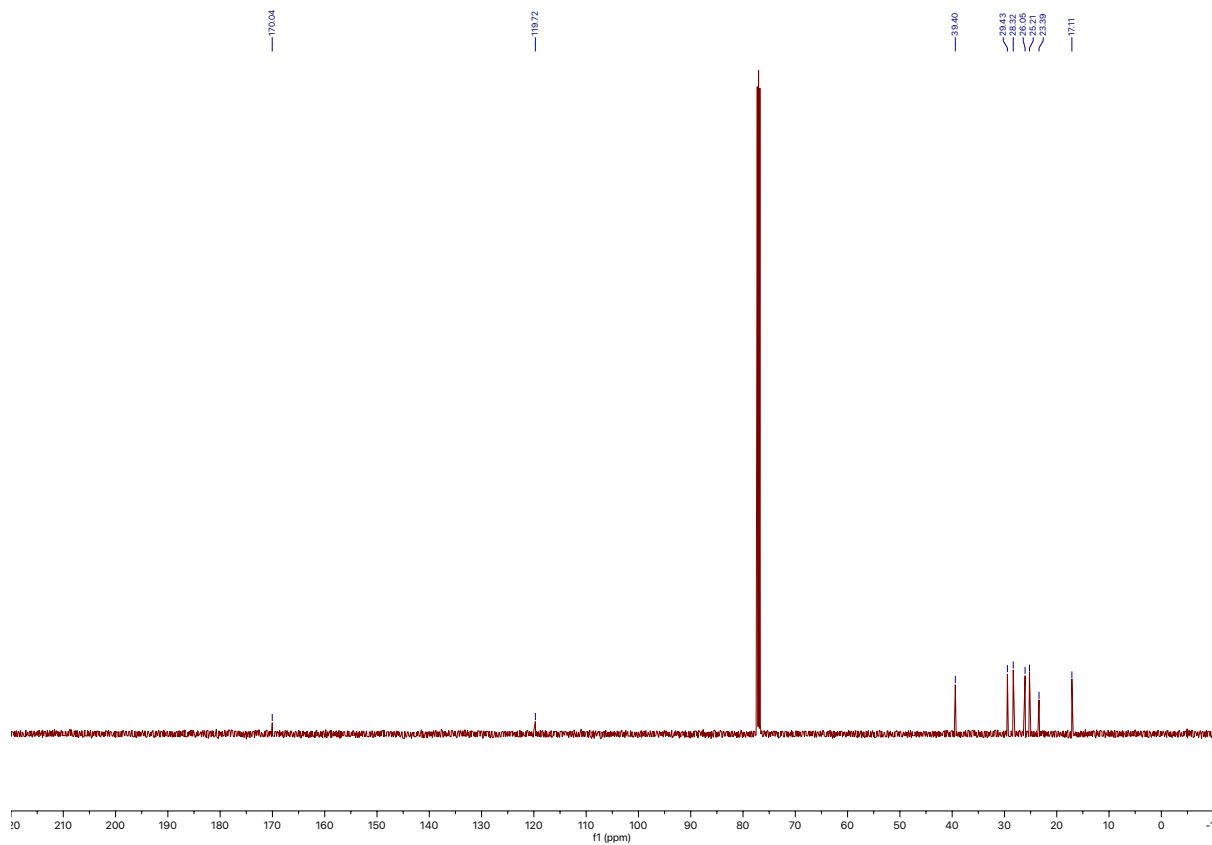

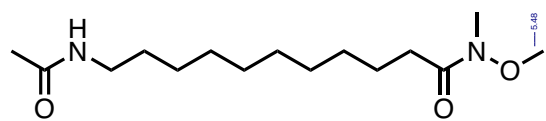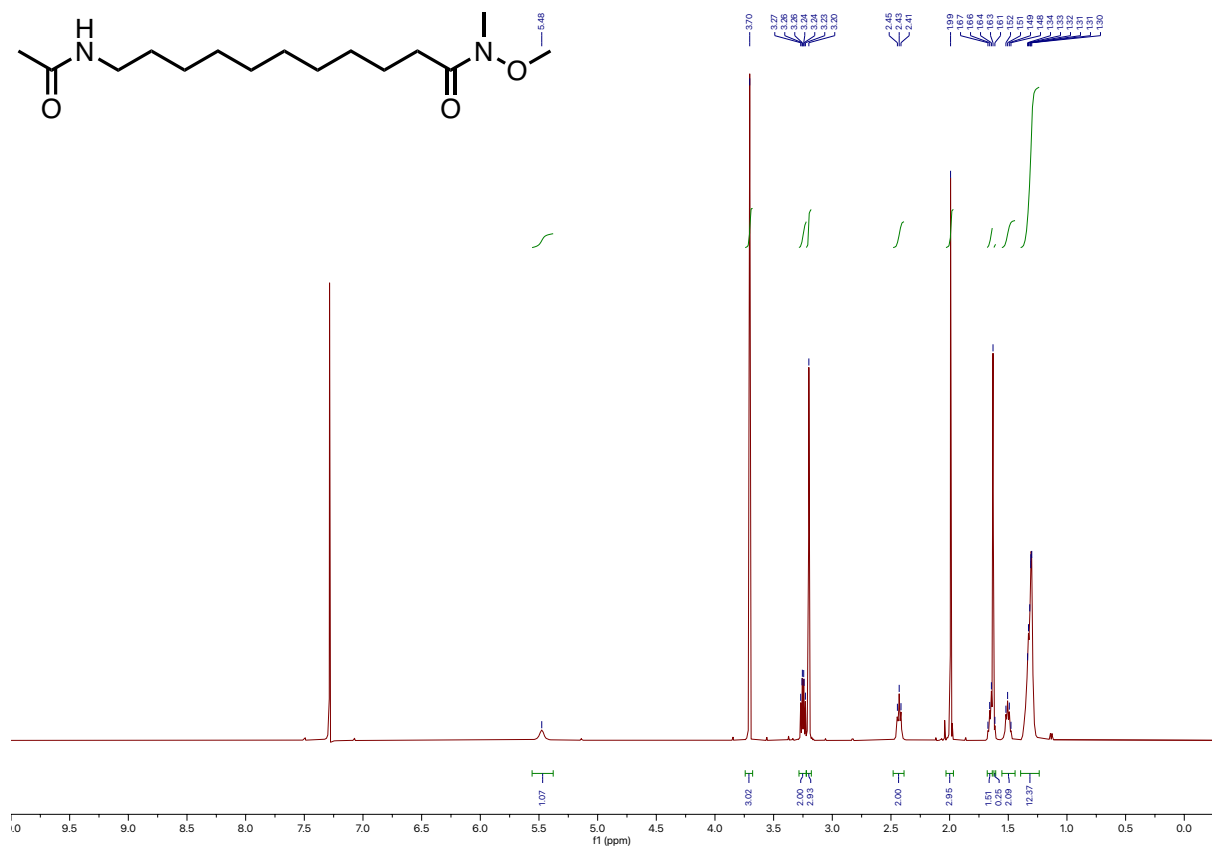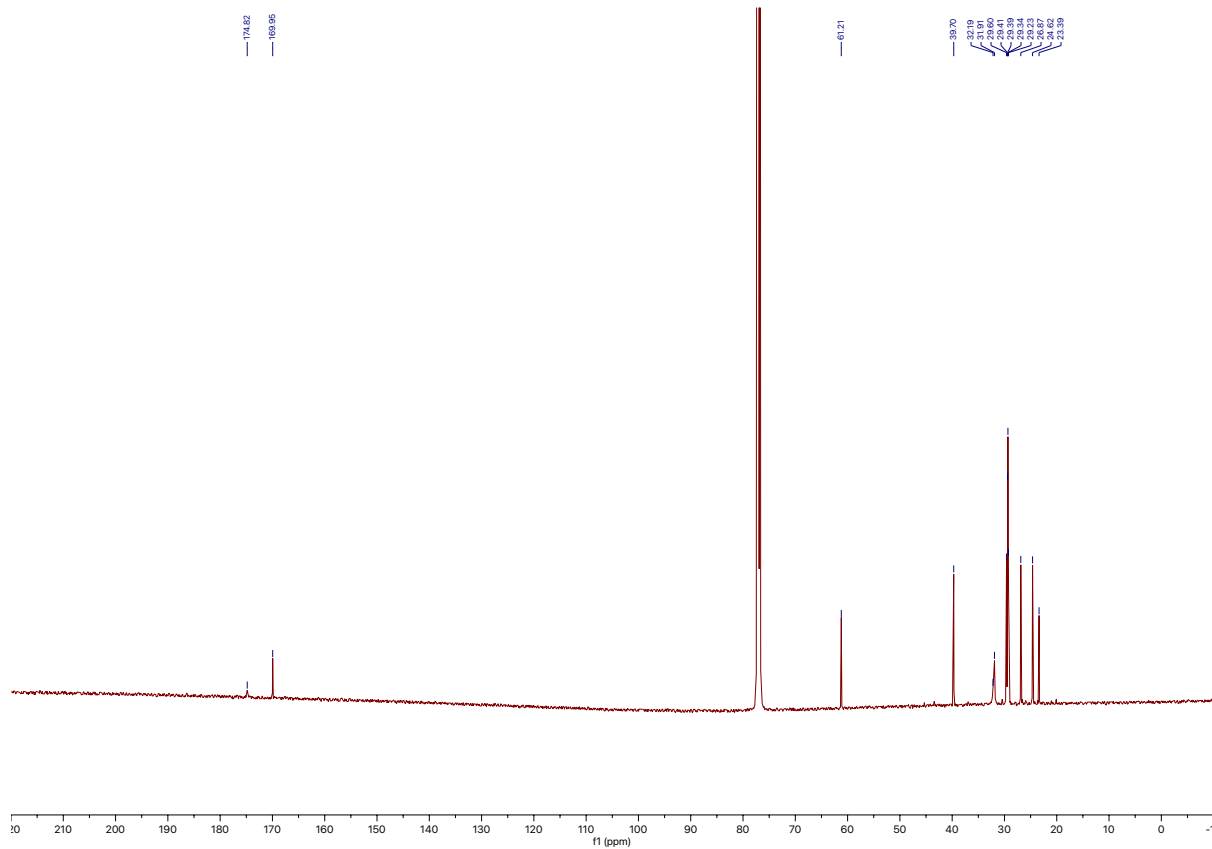





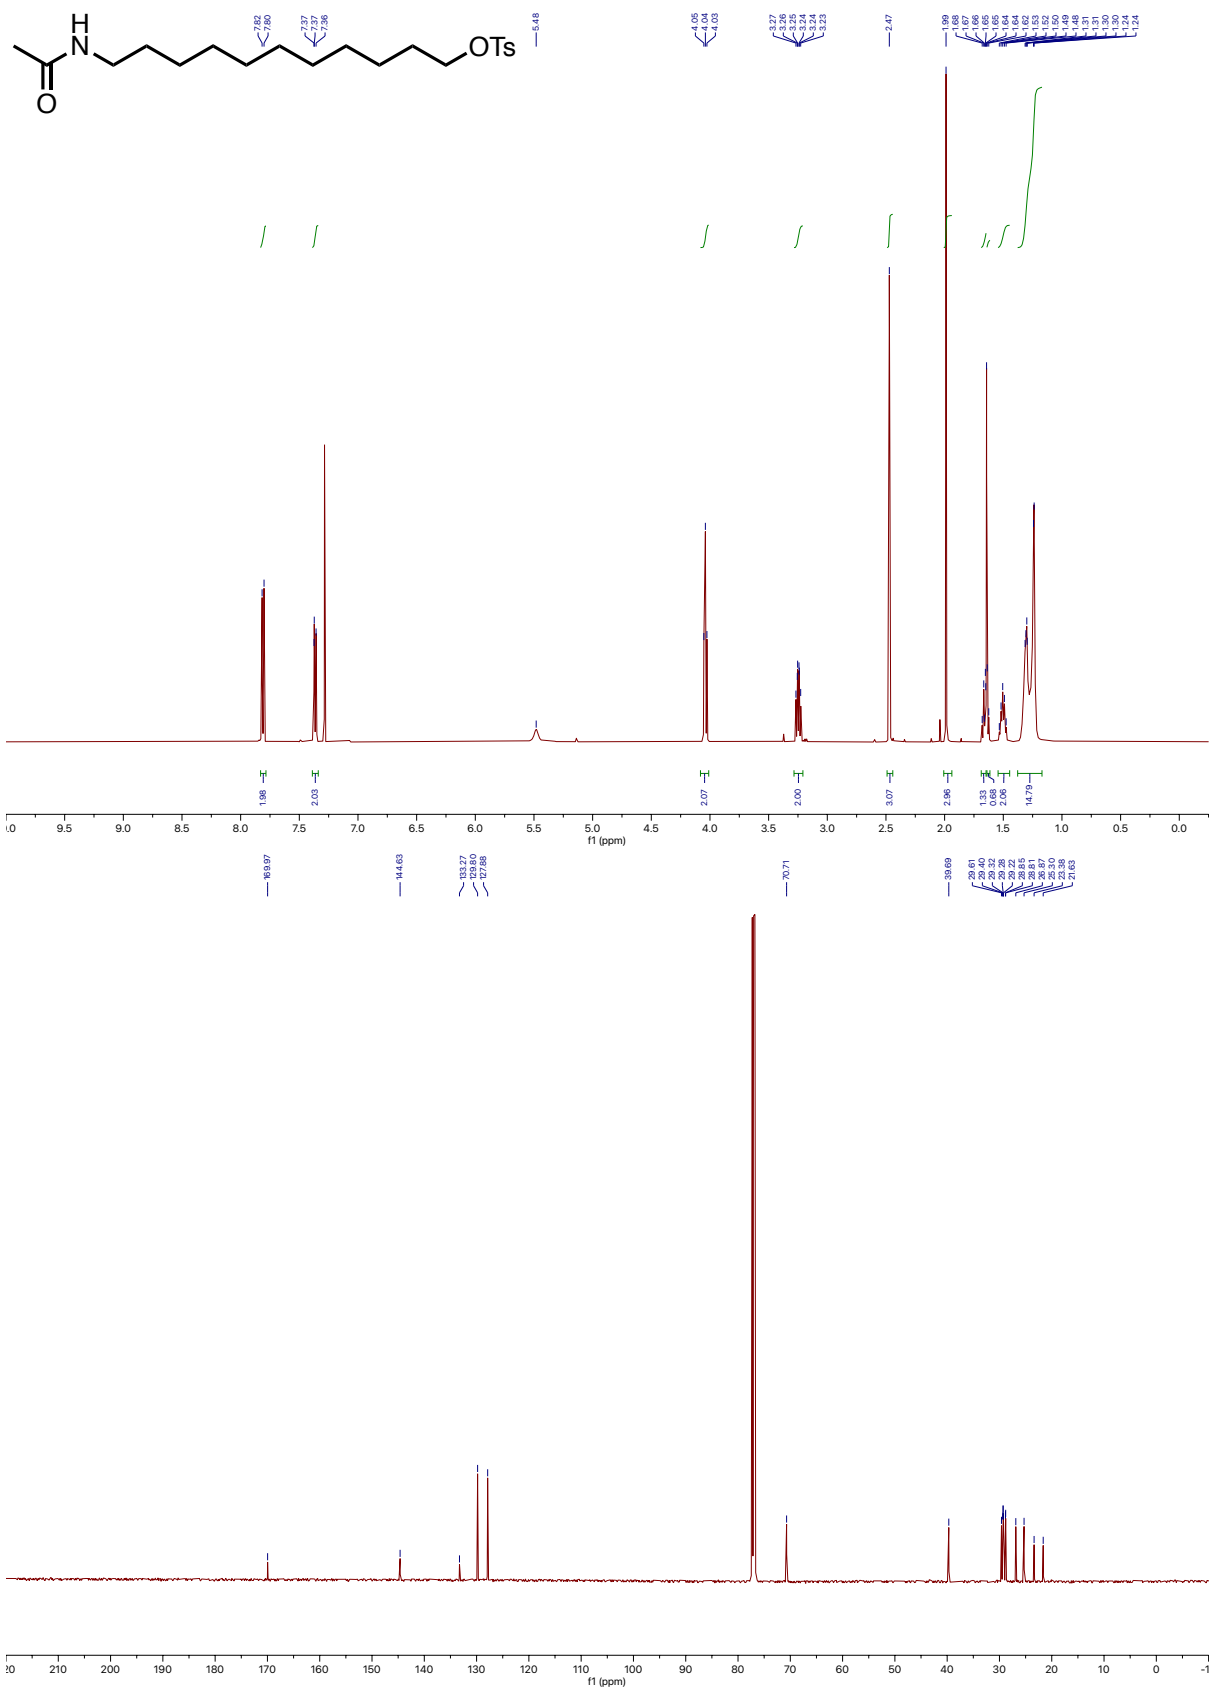

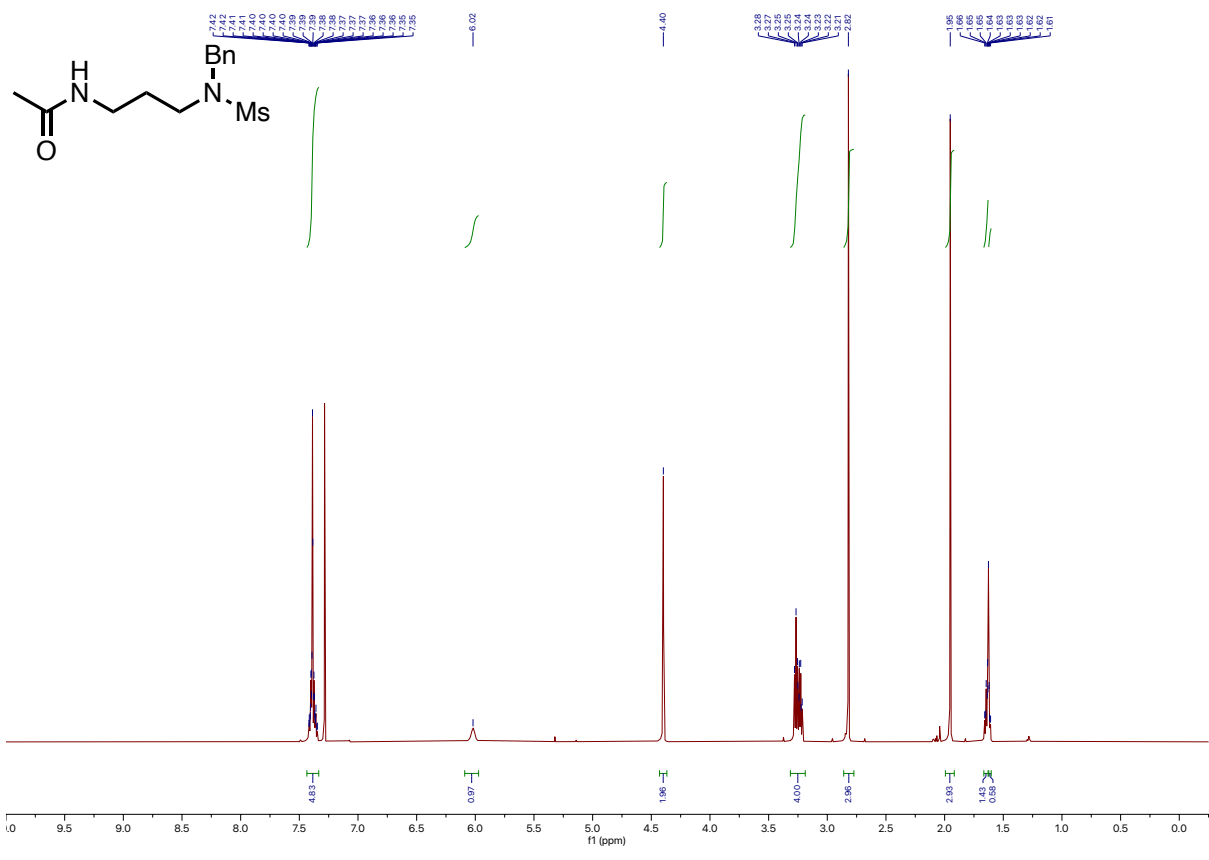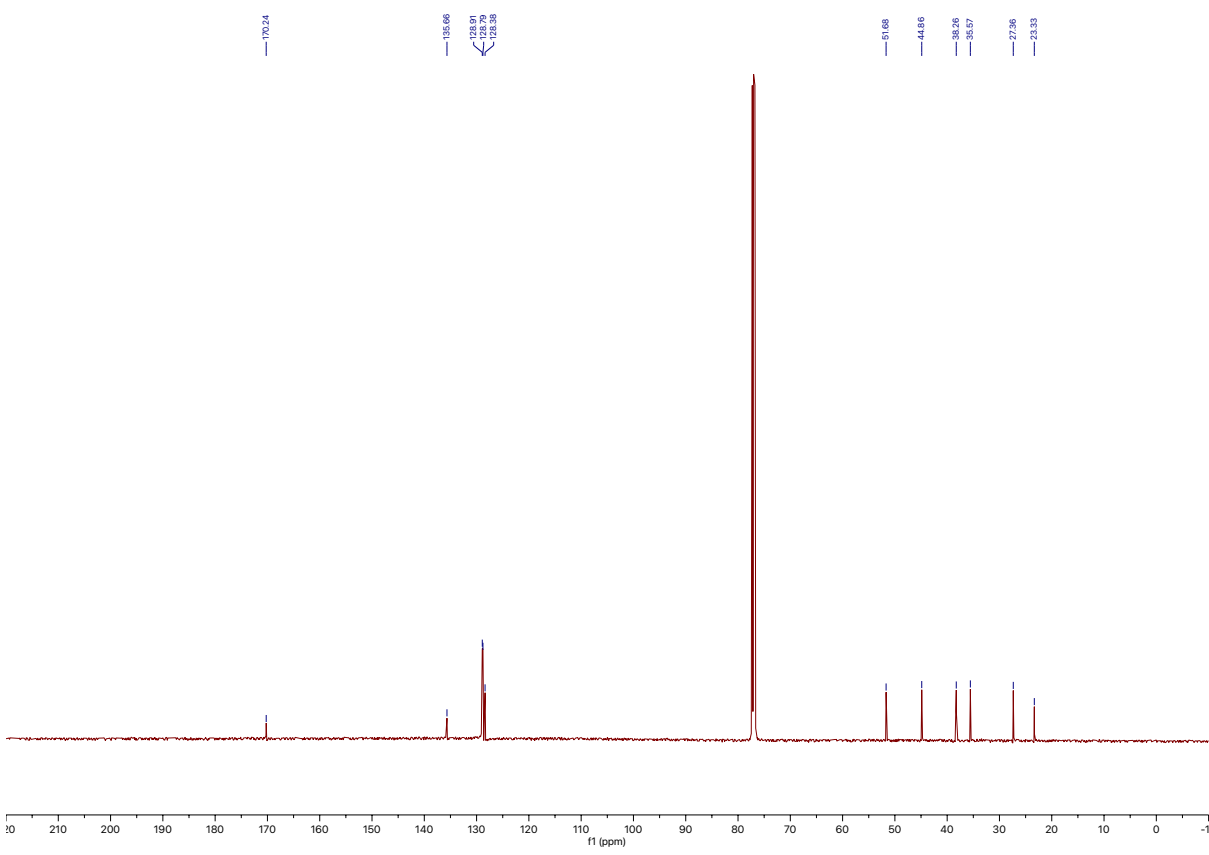

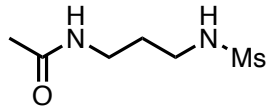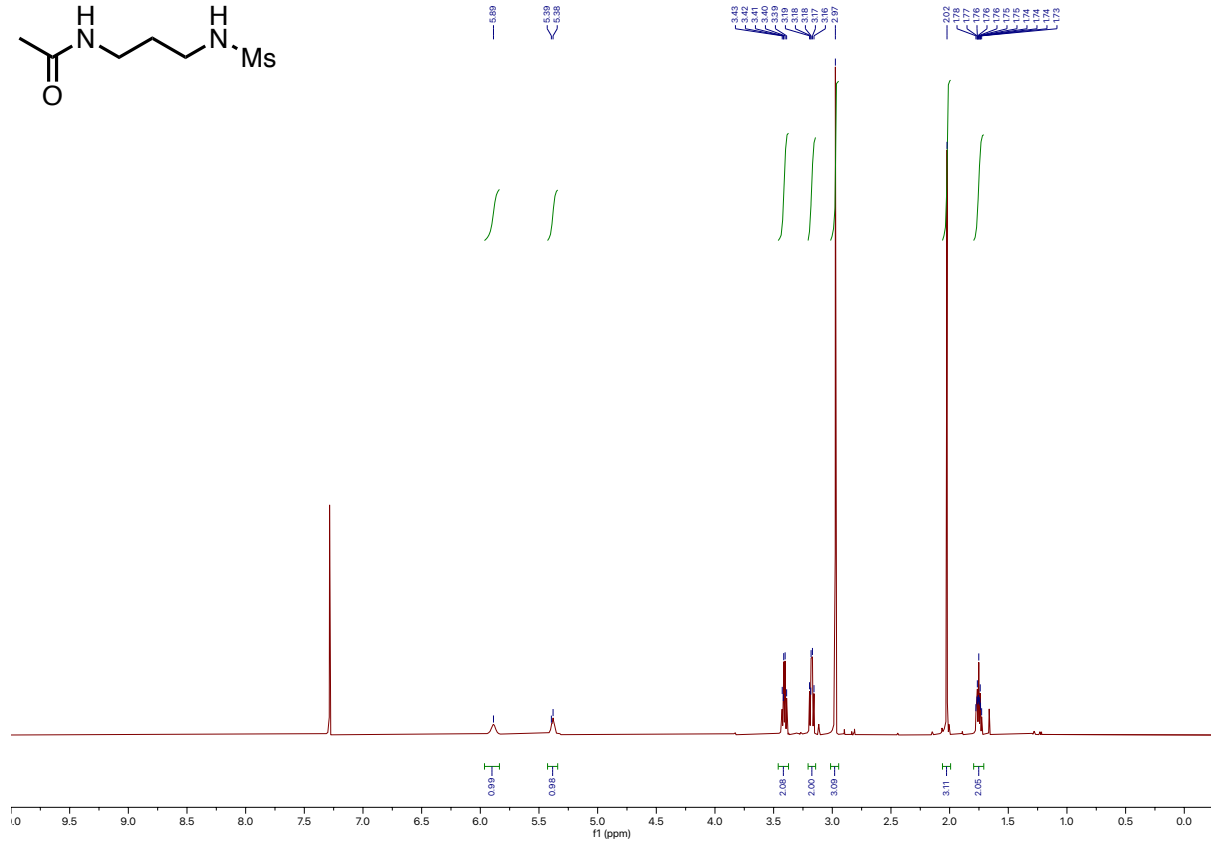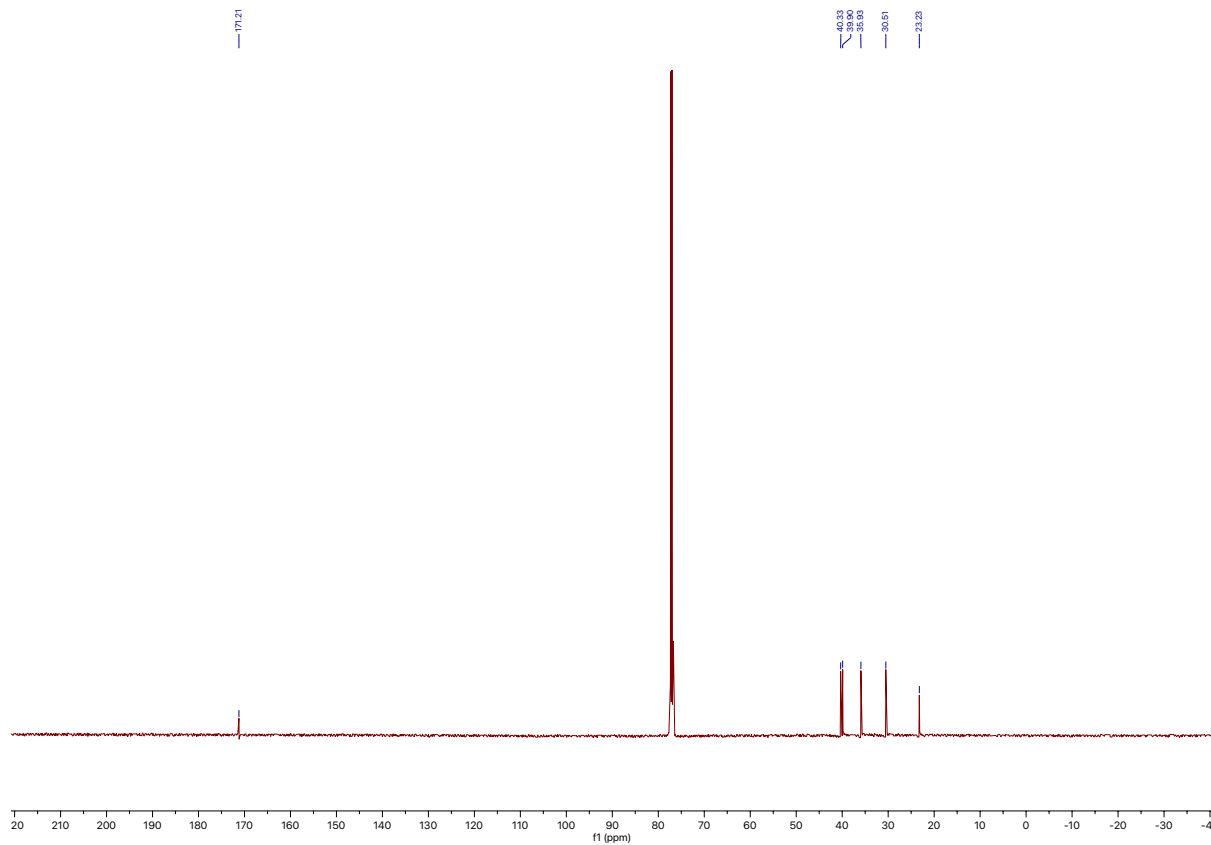



5.46  
4.99  
4.88  
4.58  
3.91  
3.90  
3.89  
3.88  
3.88  
3.86  
3.78  
3.76  
3.74  
3.74  
3.73  
3.73  
3.64  
3.63  
3.63  
3.63  
3.61  
3.51  
3.43  
3.41  
3.40  
3.40  
3.38  
3.38  
3.36  
3.35  
3.24  
3.24  
1.99  
1.86  
1.84  
1.84  
1.84  
1.82  
1.82  
1.76  
1.75  
1.75  
1.73  
1.73  
1.72  
1.72  
1.71  
1.71  
1.64  
1.64  
1.63  
1.63  
1.61  
1.61  
1.60  
1.60  
1.59  
1.59  
1.58  
1.58  
1.58  
1.57  
1.57  
1.57  
1.57  
1.57  
1.56  
1.56  
1.56  
1.55  
1.55  
1.54  
1.54  
1.53  
1.53  
1.52  
1.52  
1.52  
1.50  
1.50  
1.43  
1.43  
1.42  
1.42  
1.41  
1.41  
1.41  
1.41  
1.40  
1.40  
1.39  
1.39  
1.38  
1.38  
1.37  
1.37  
1.36  
1.36  
1.35

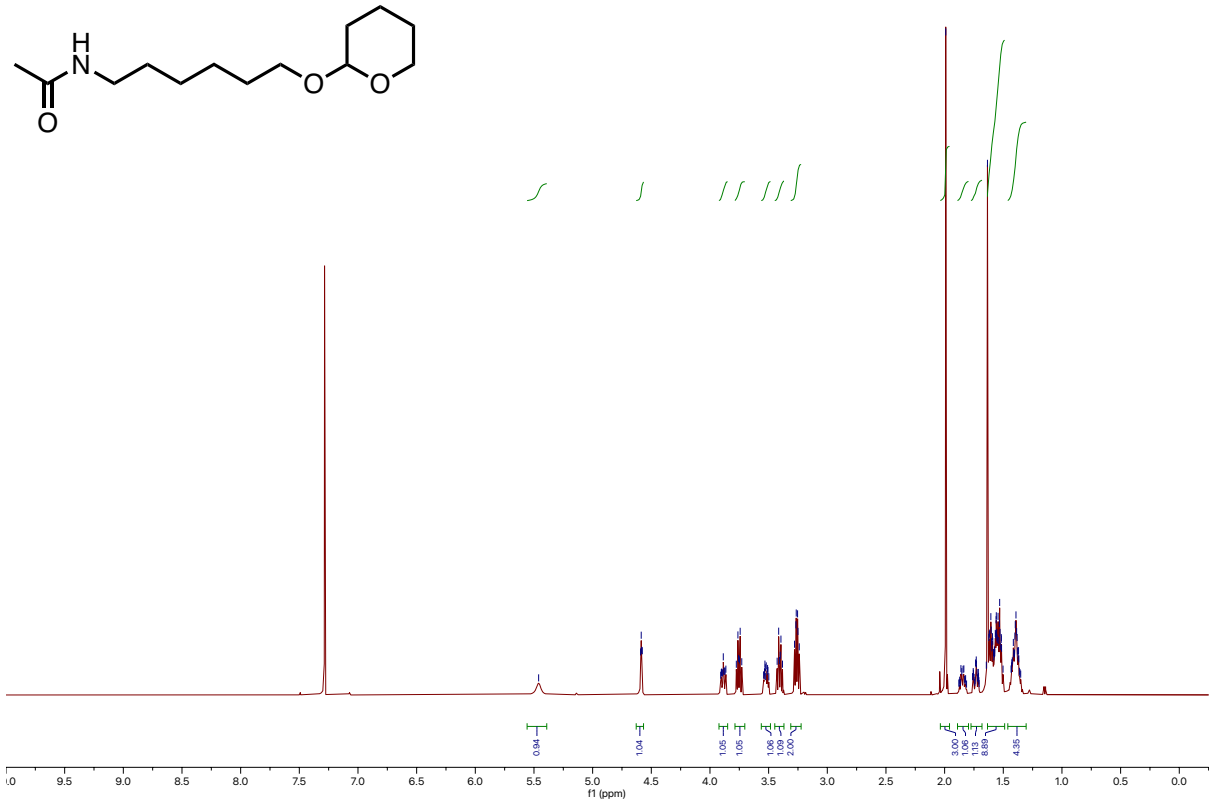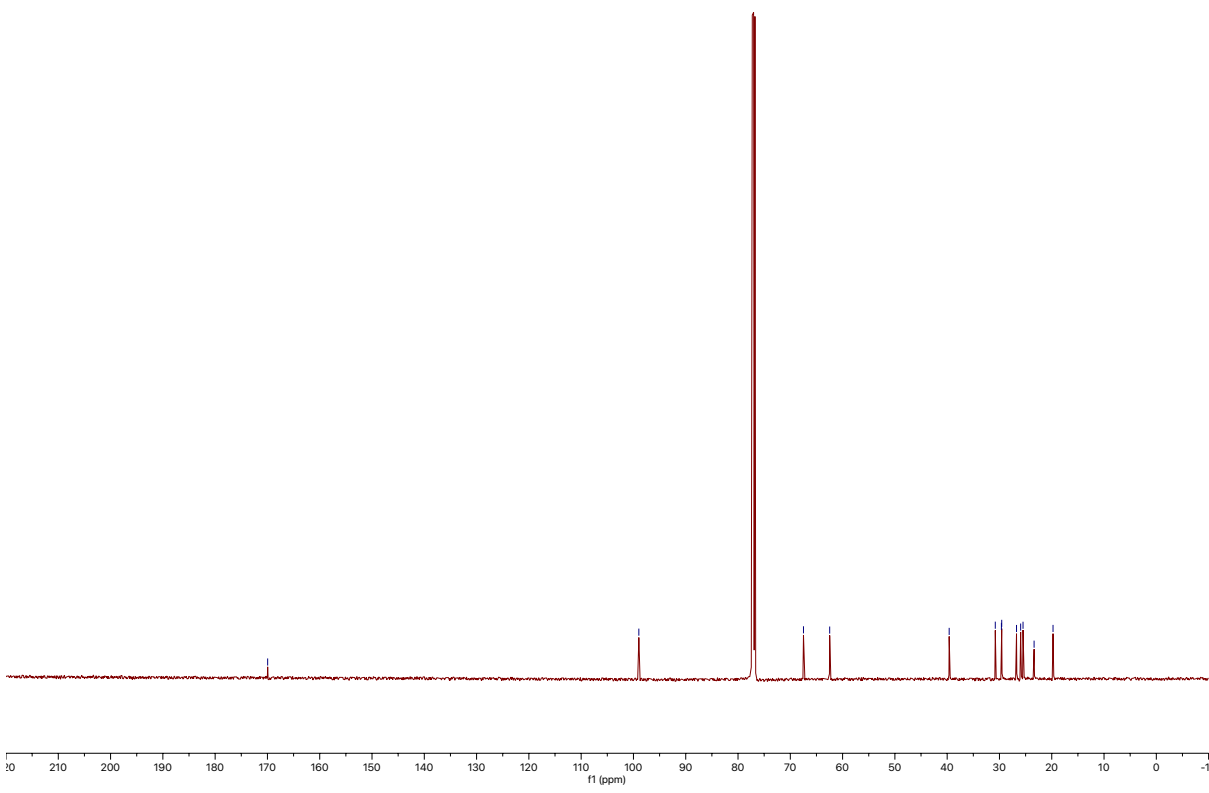

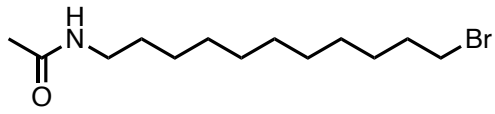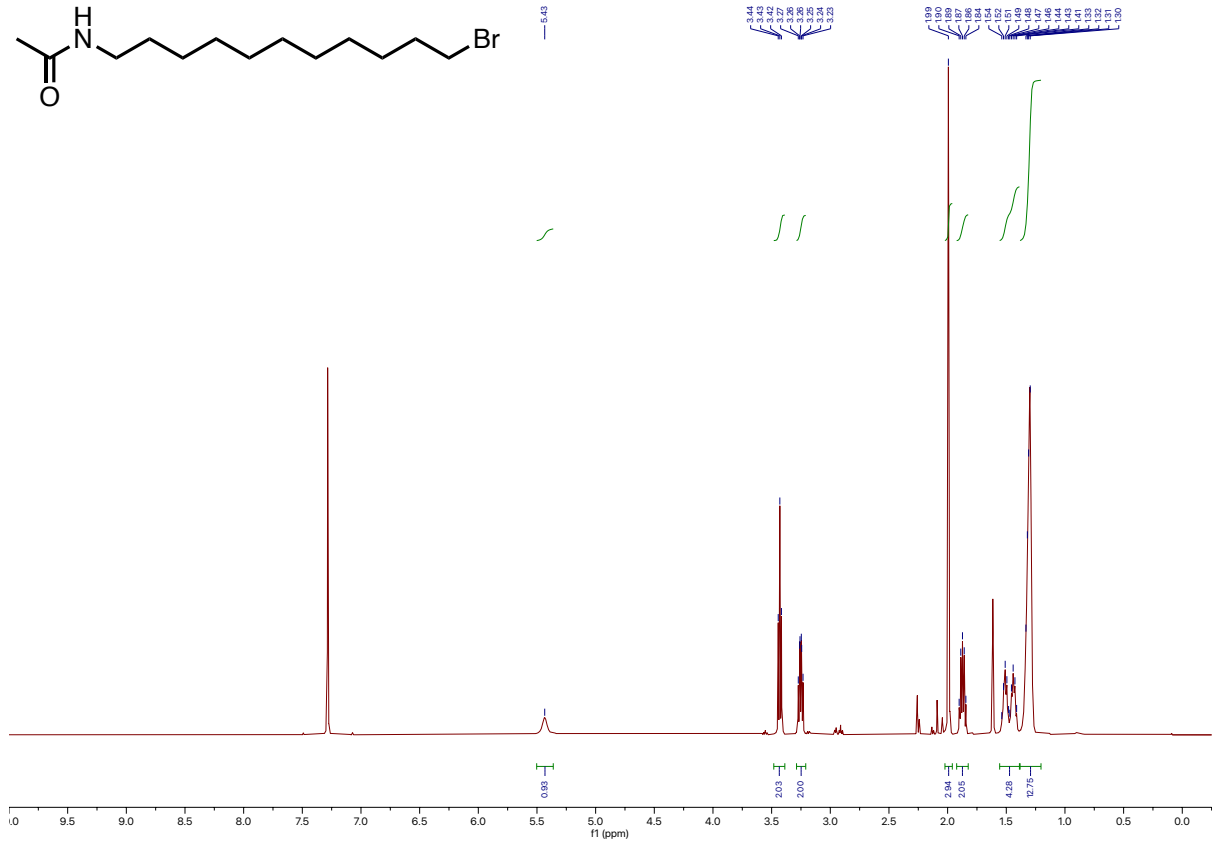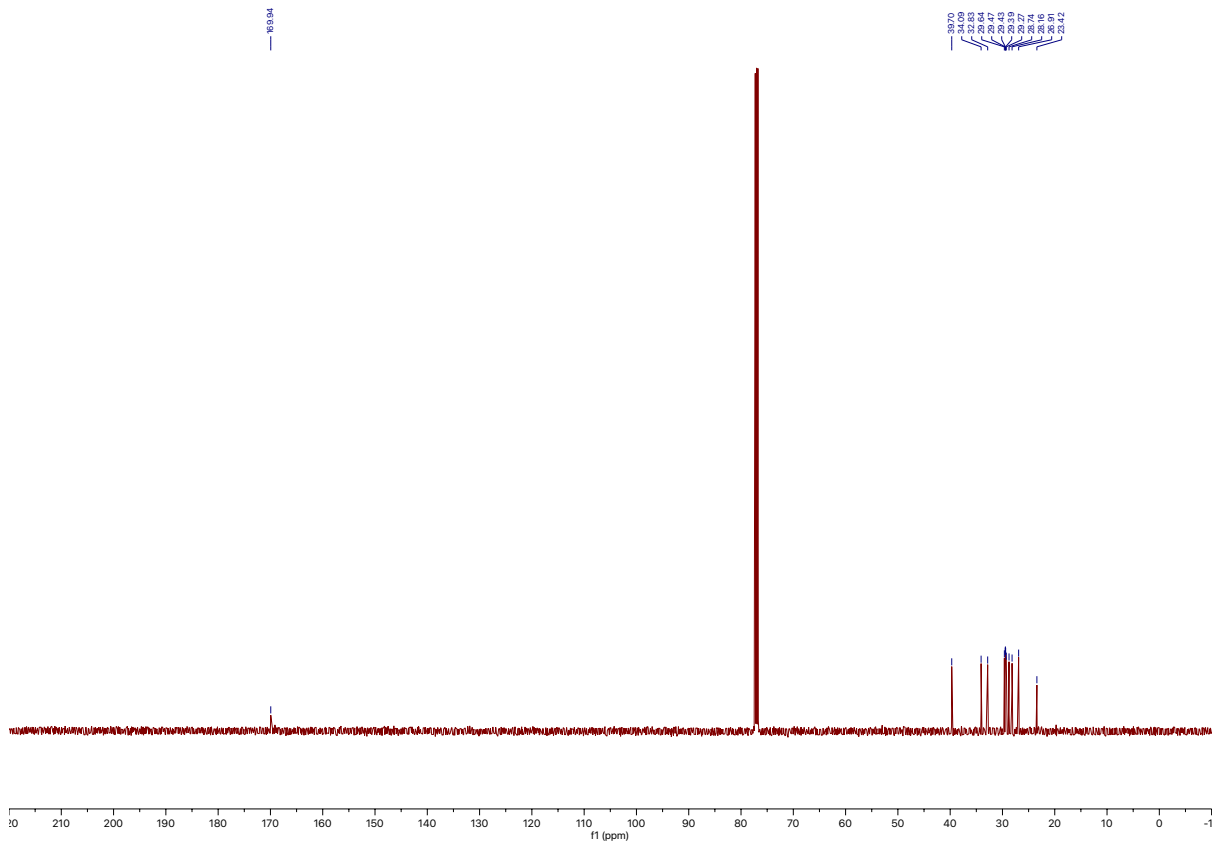







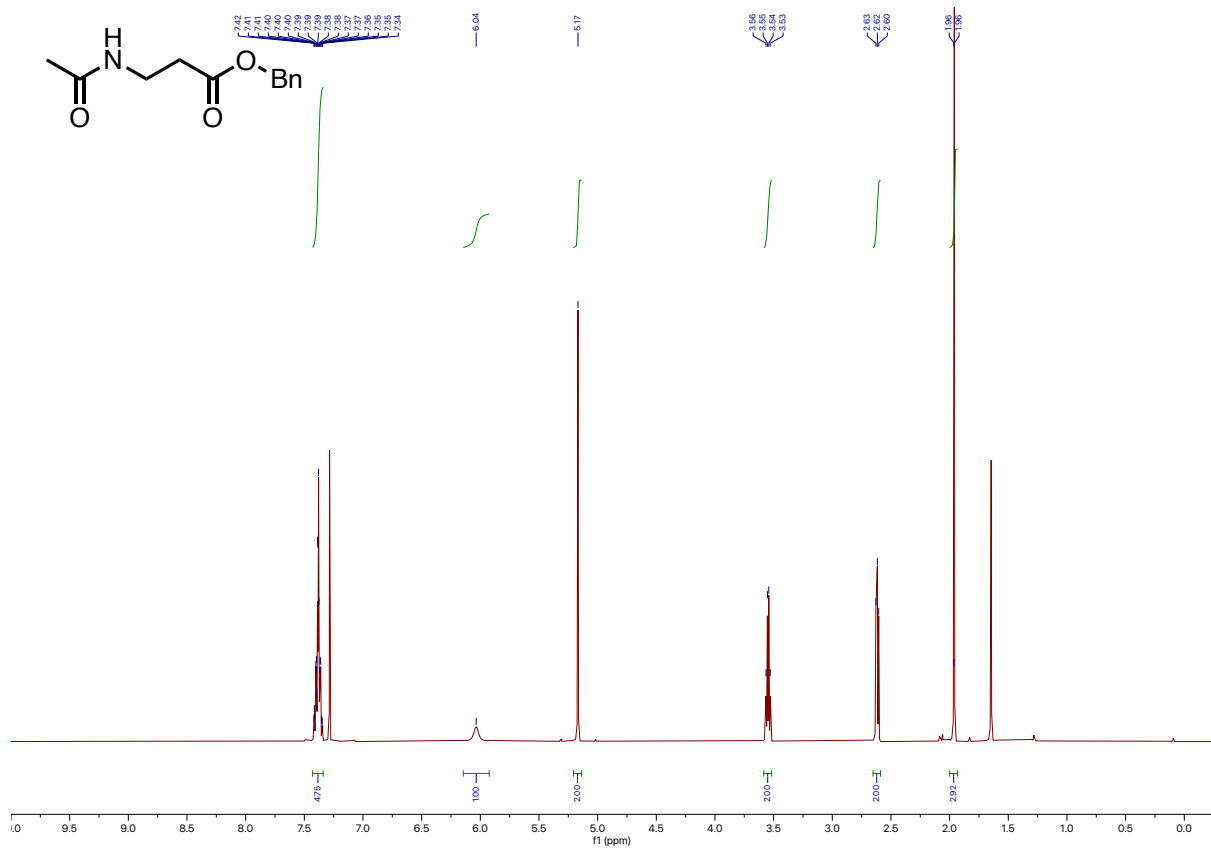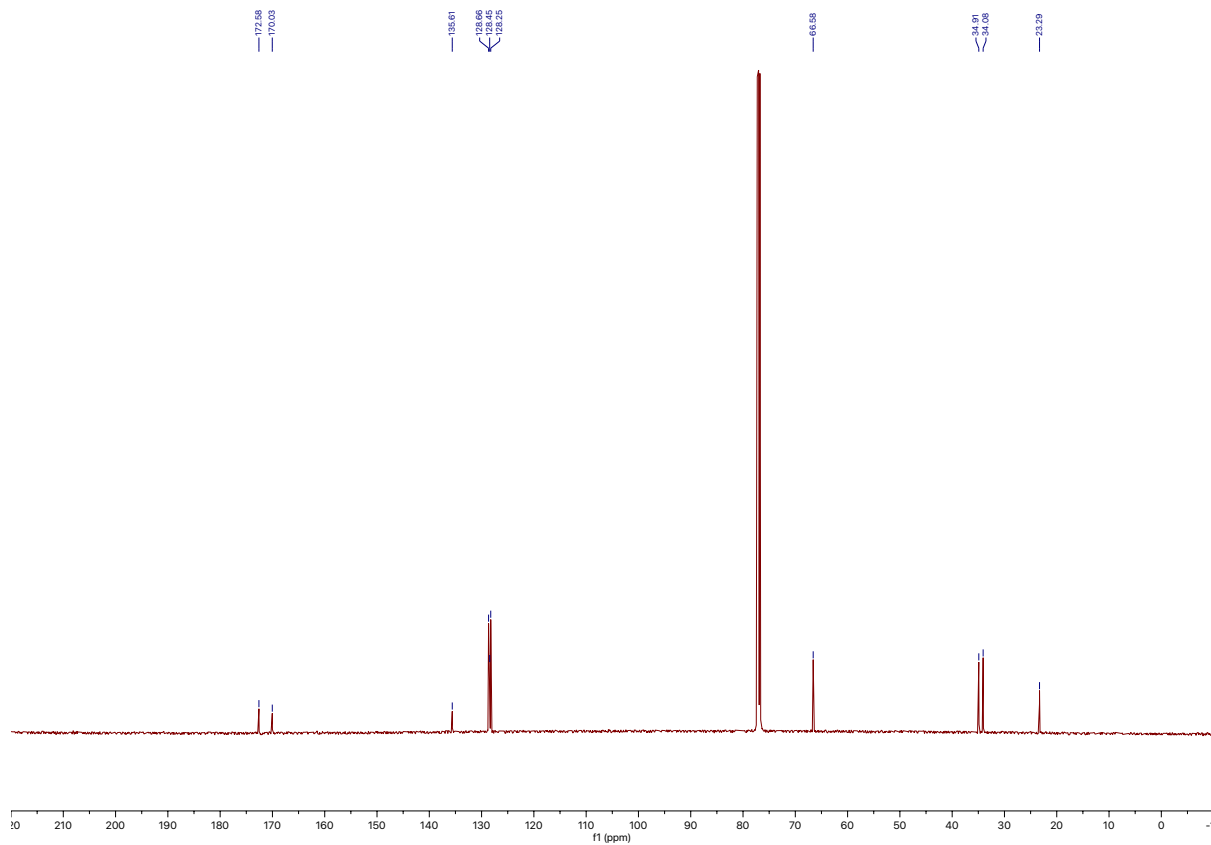

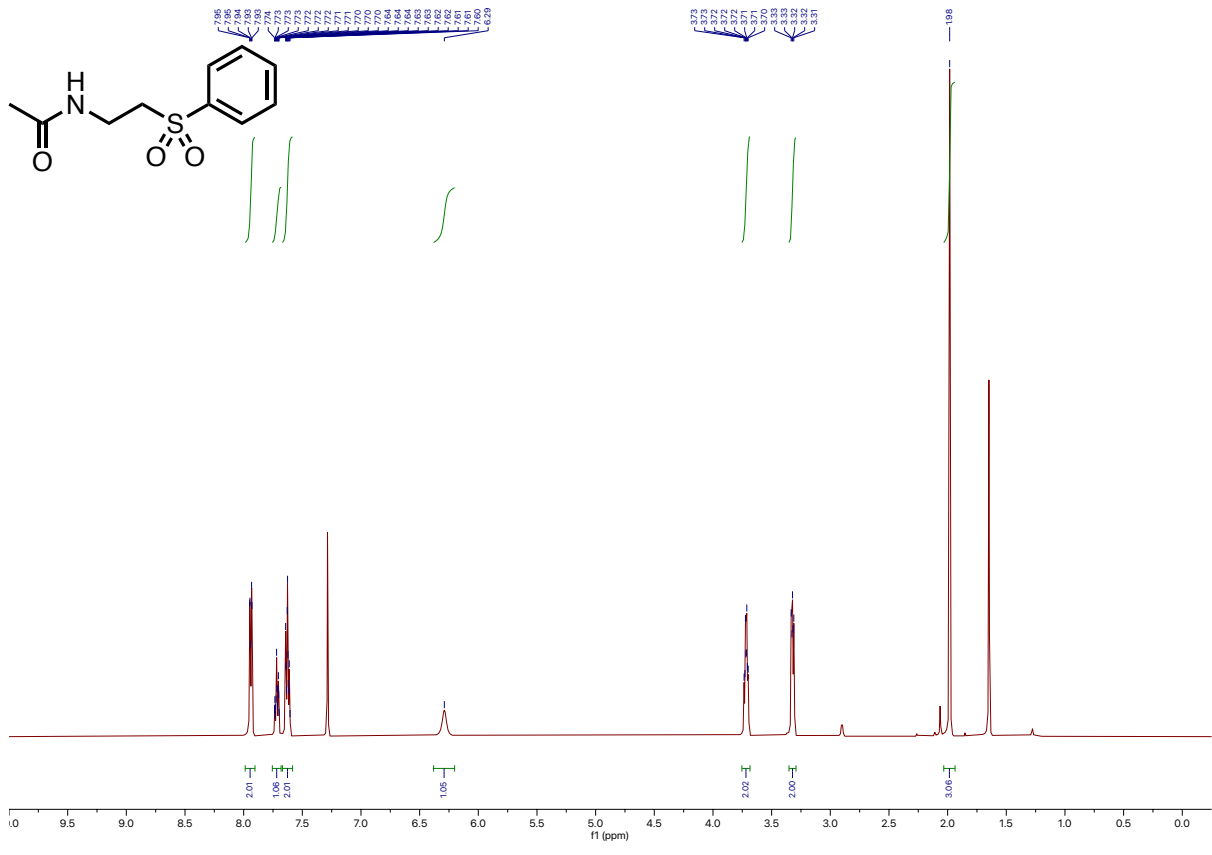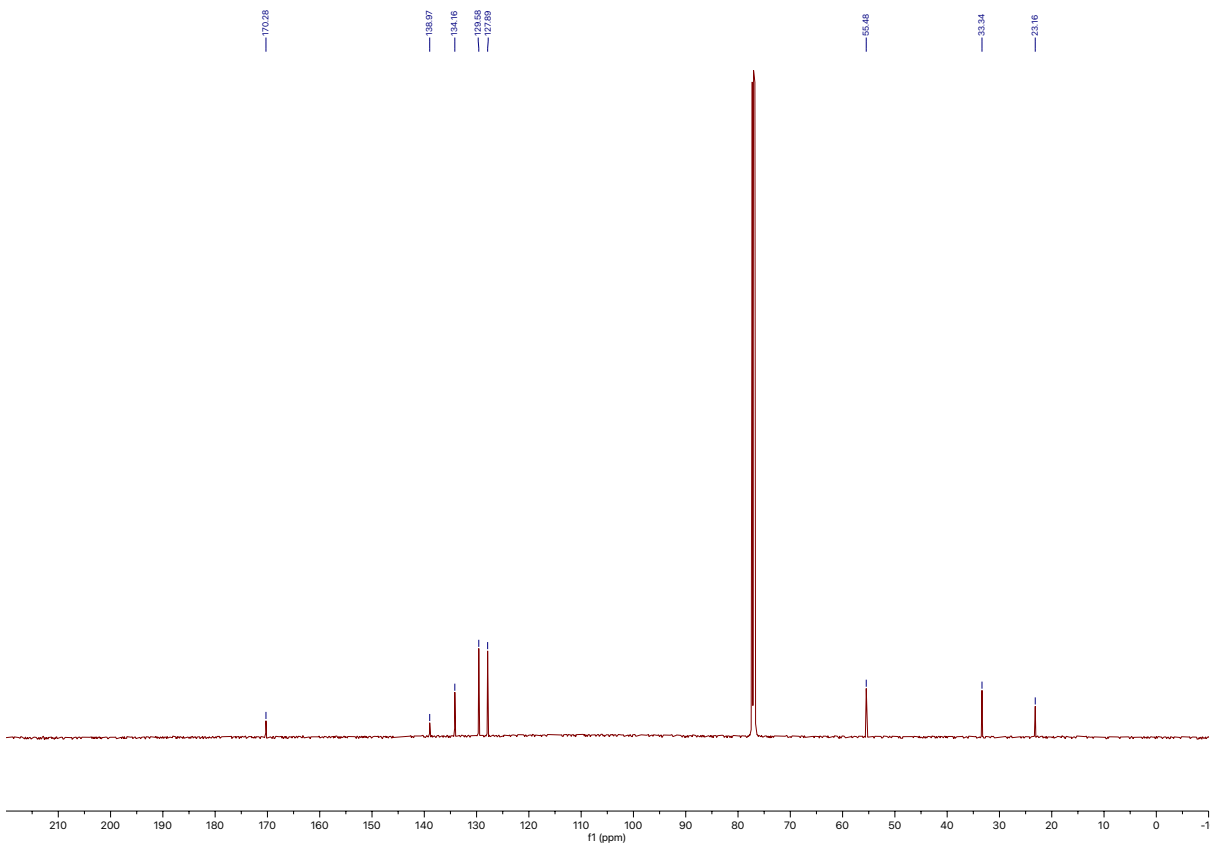



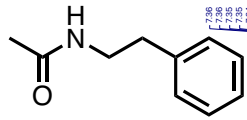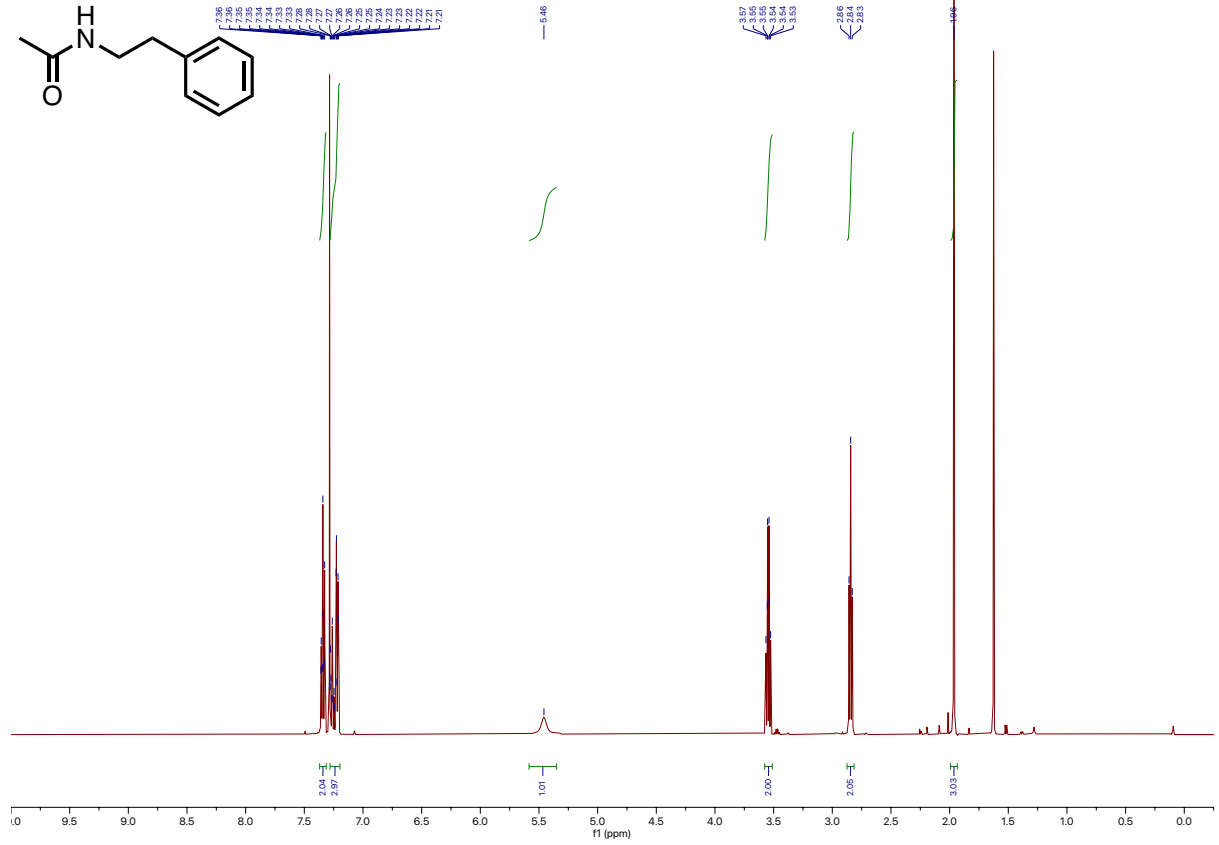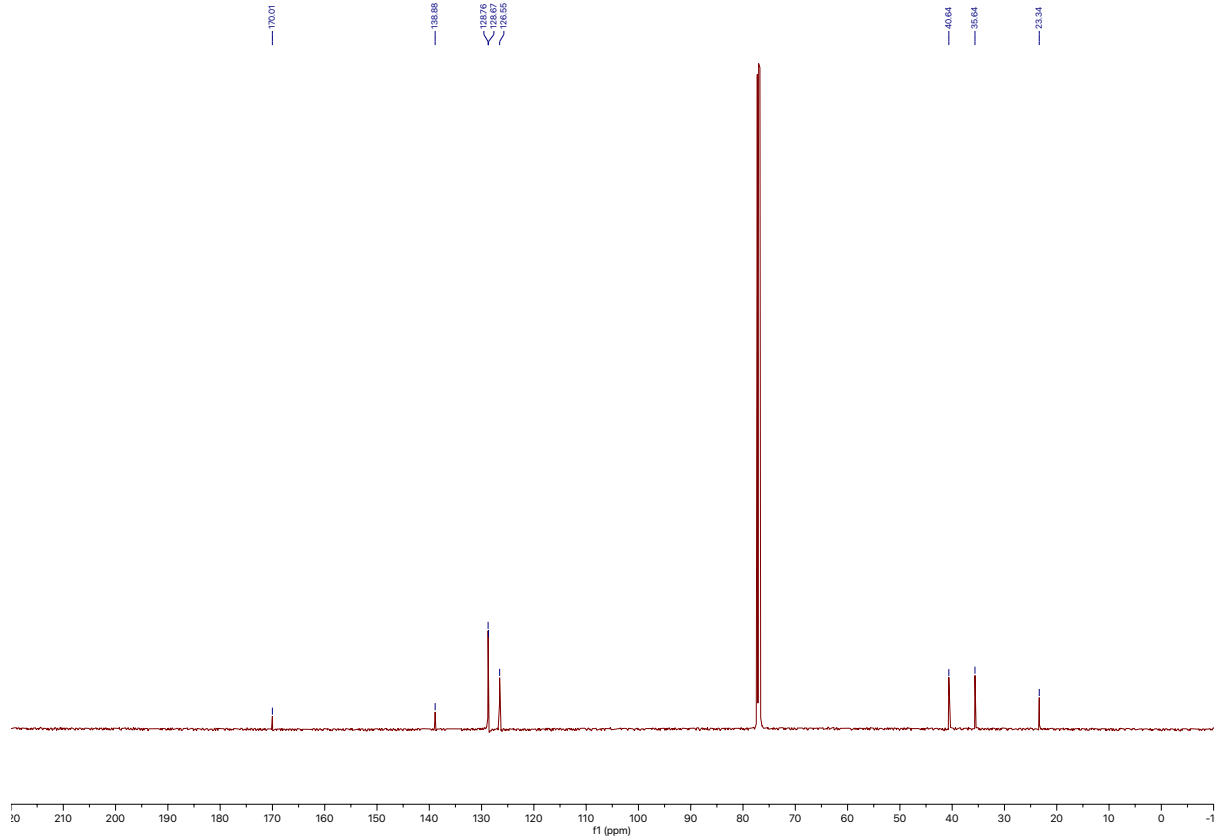

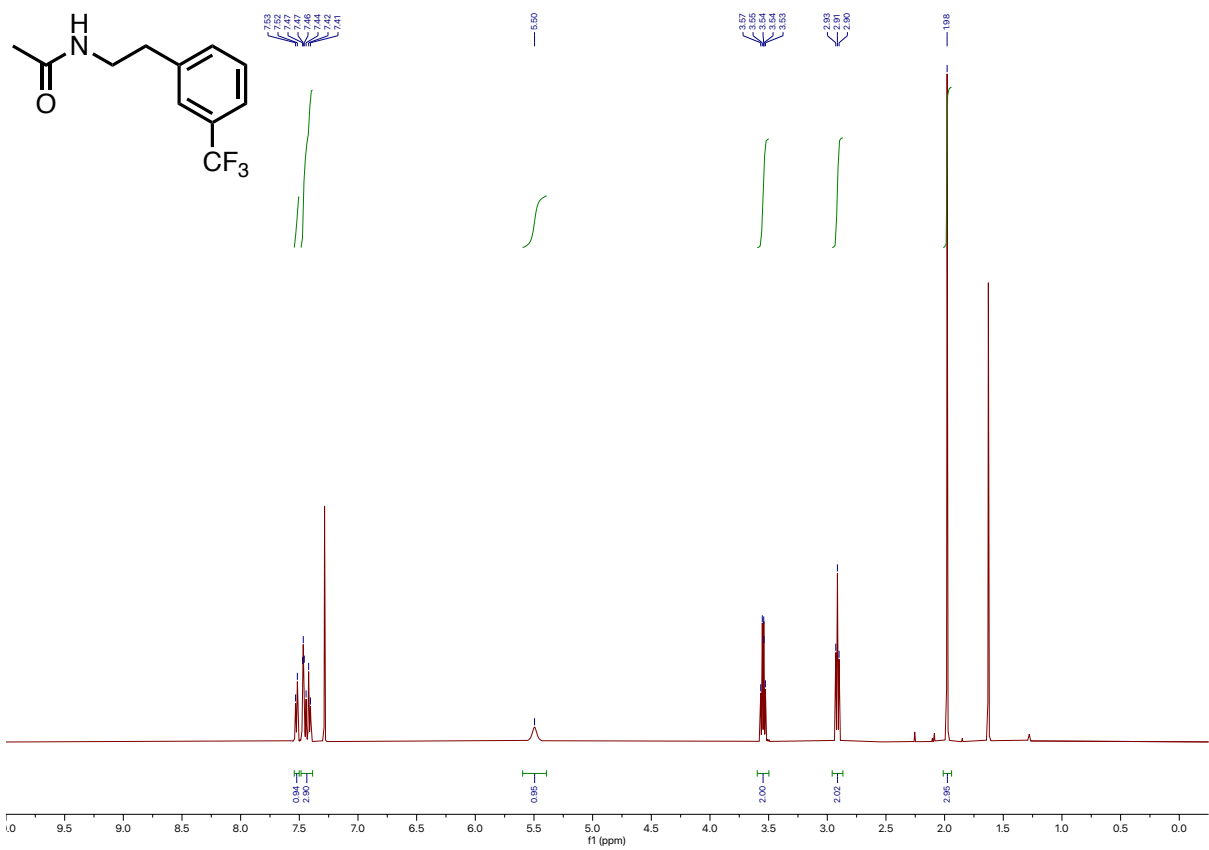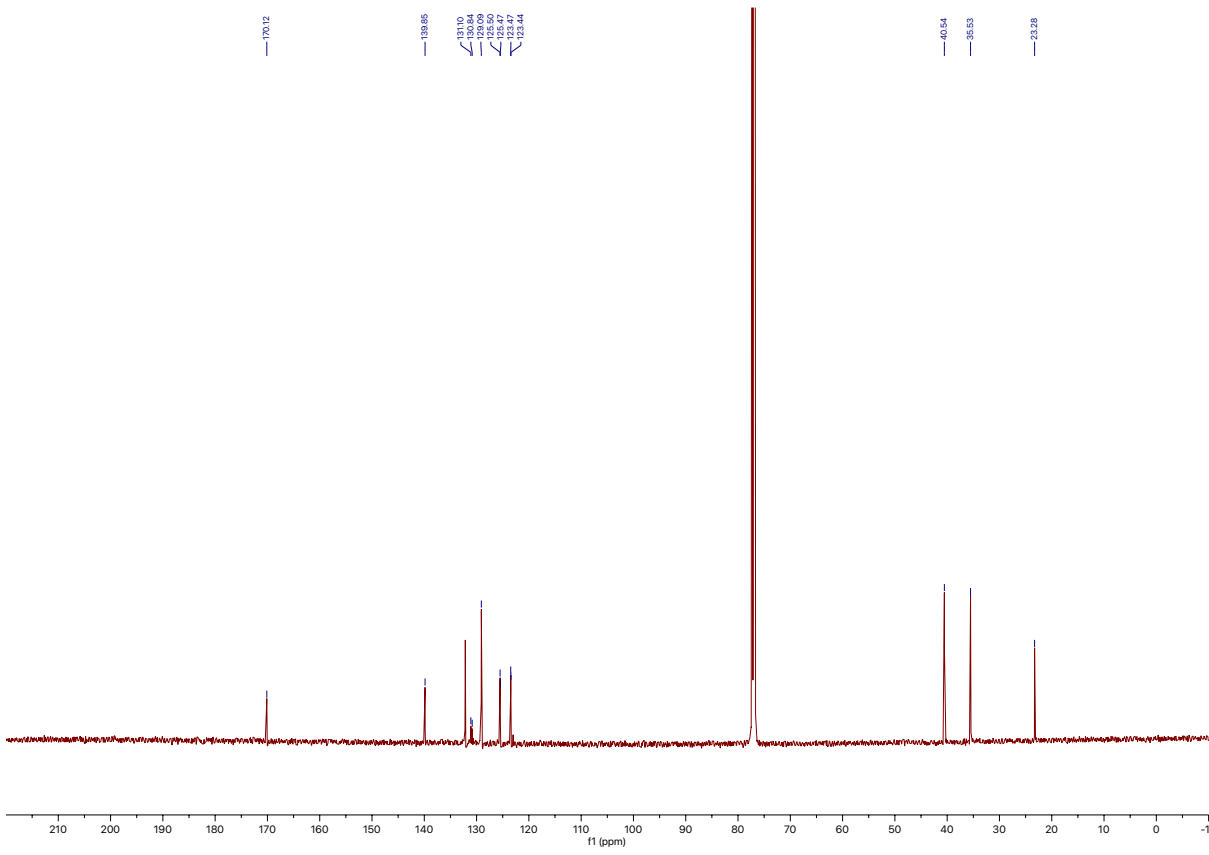

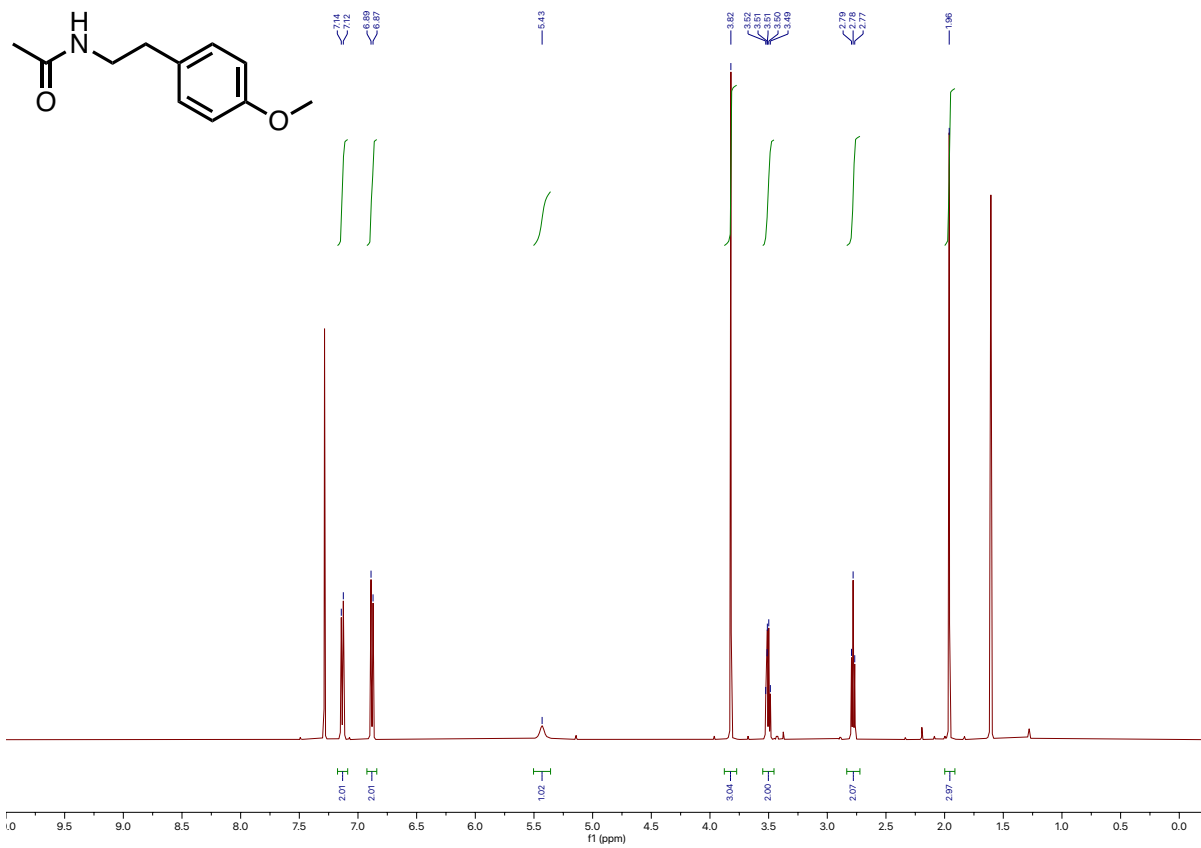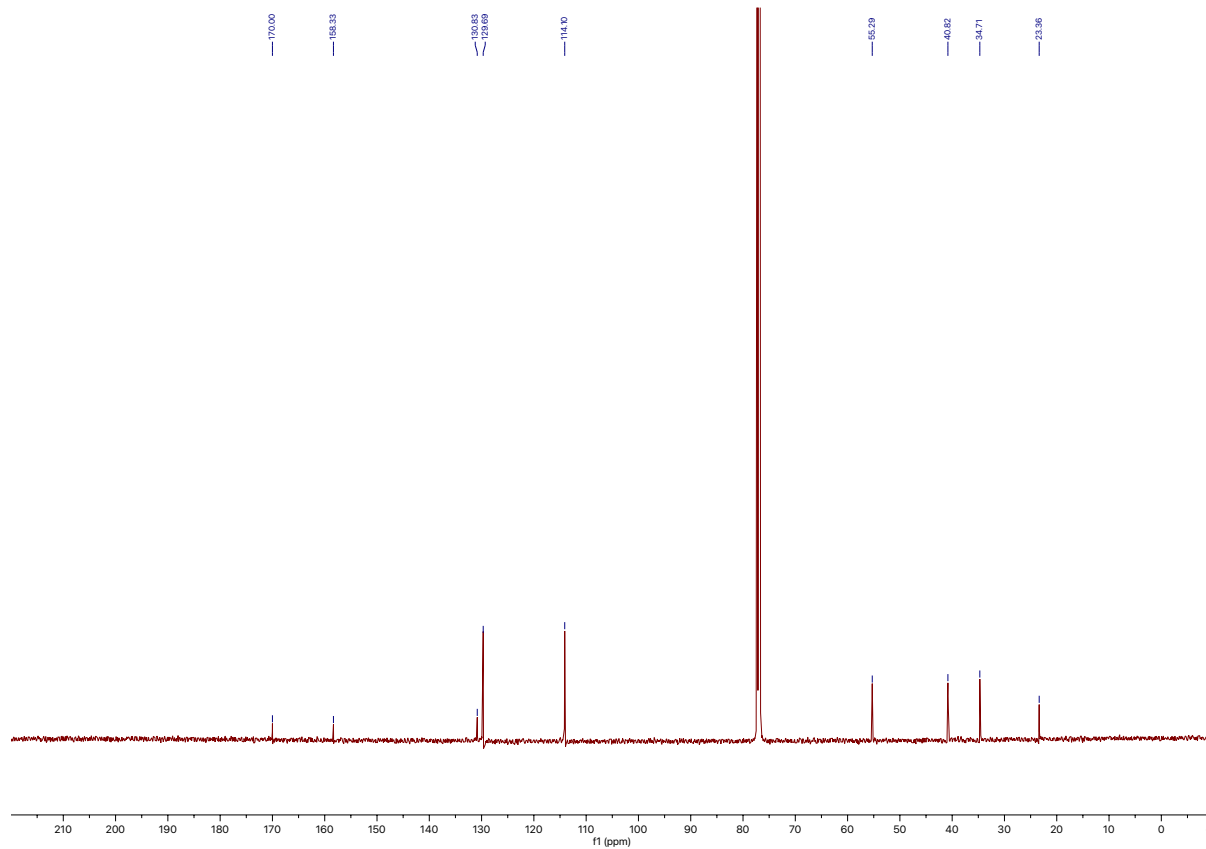

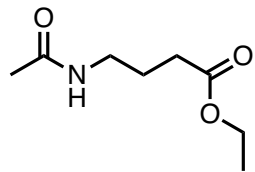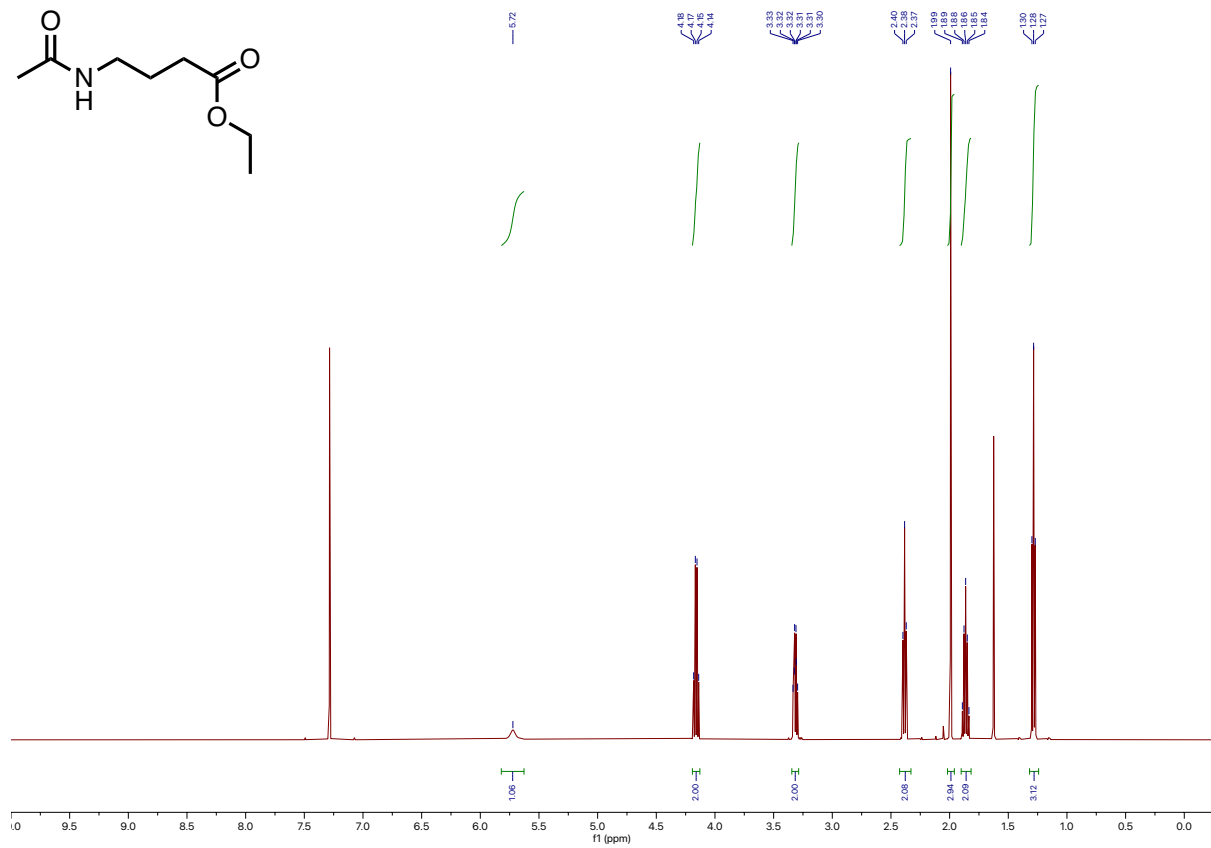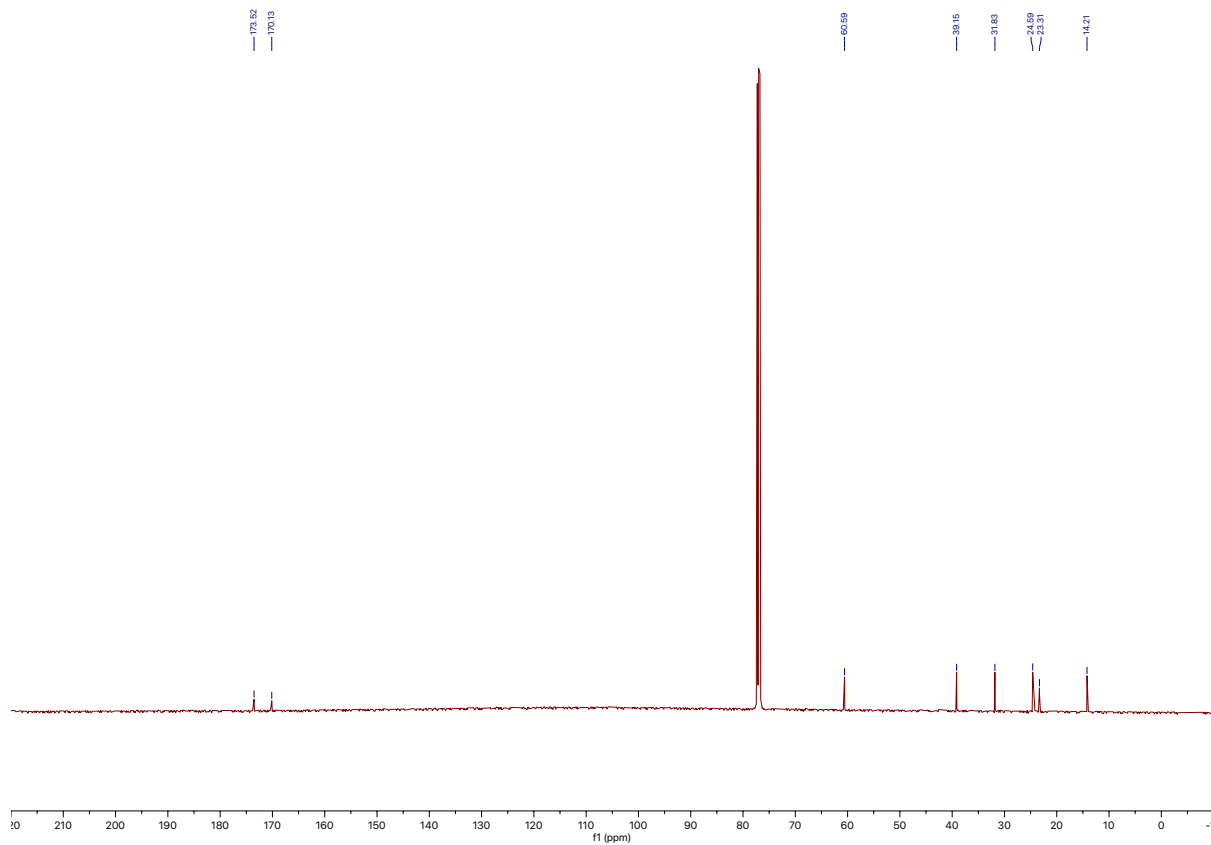

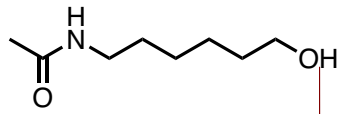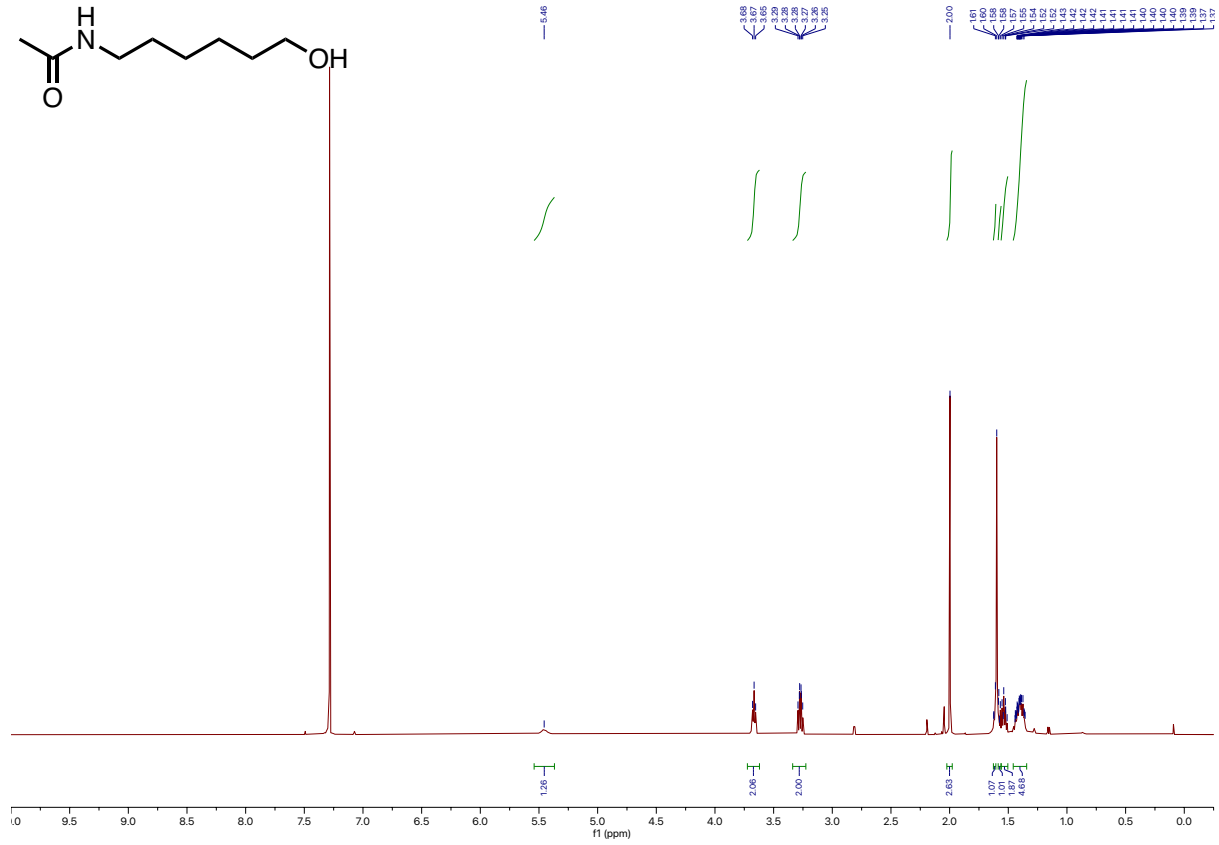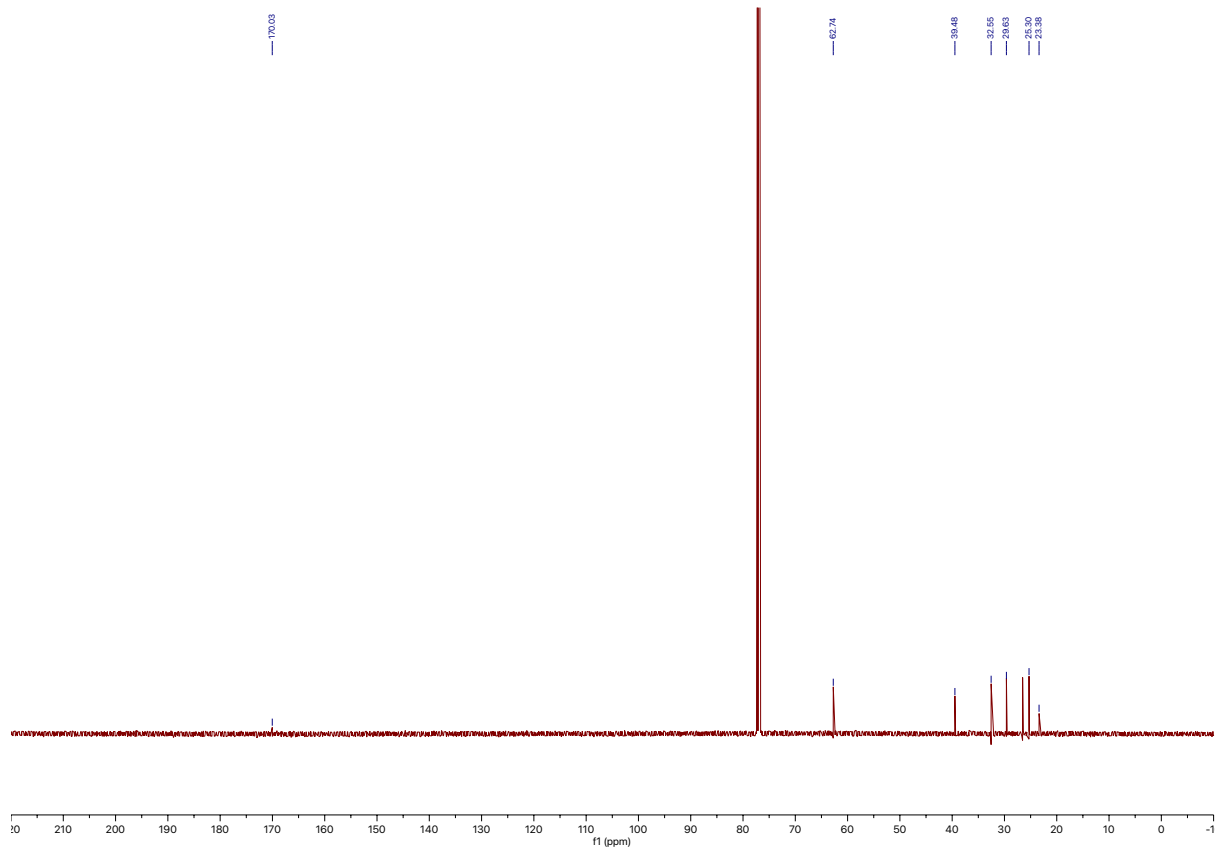



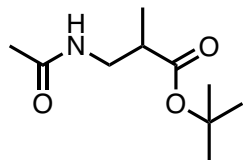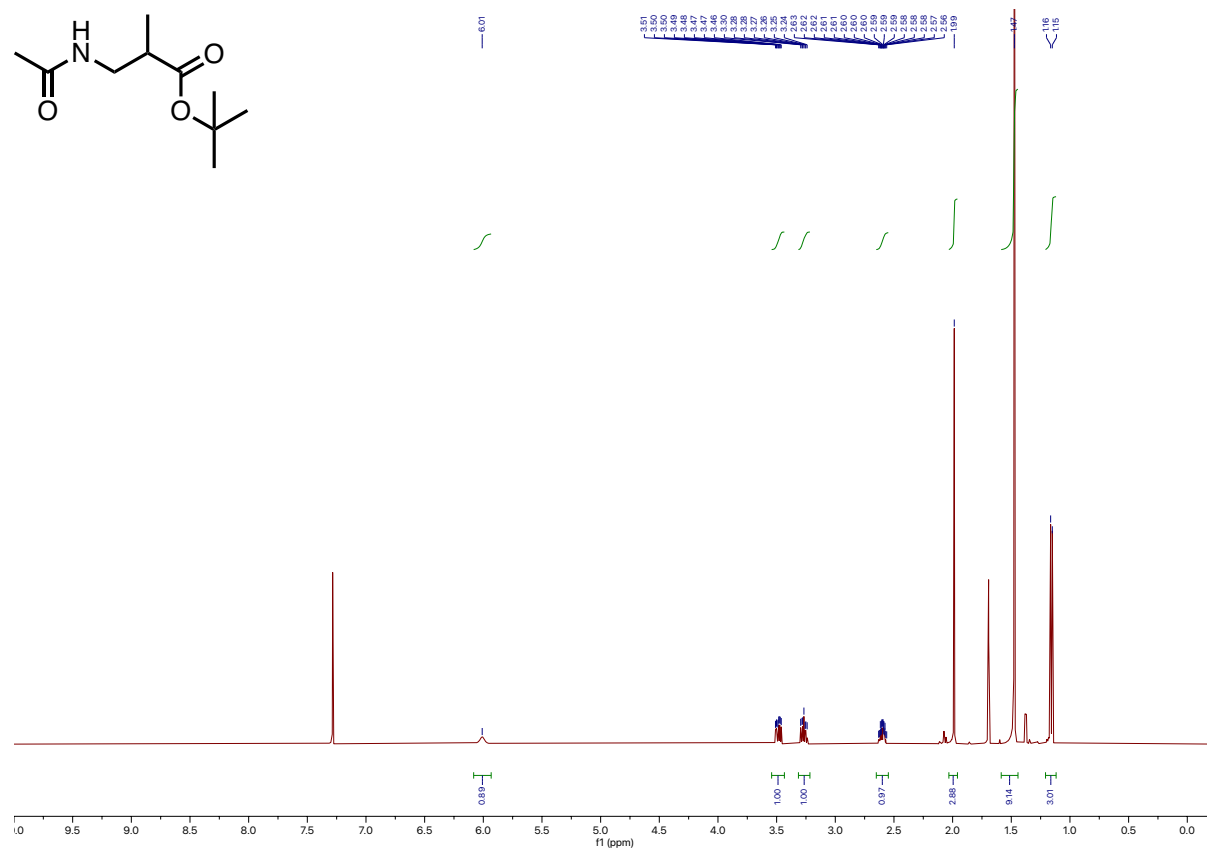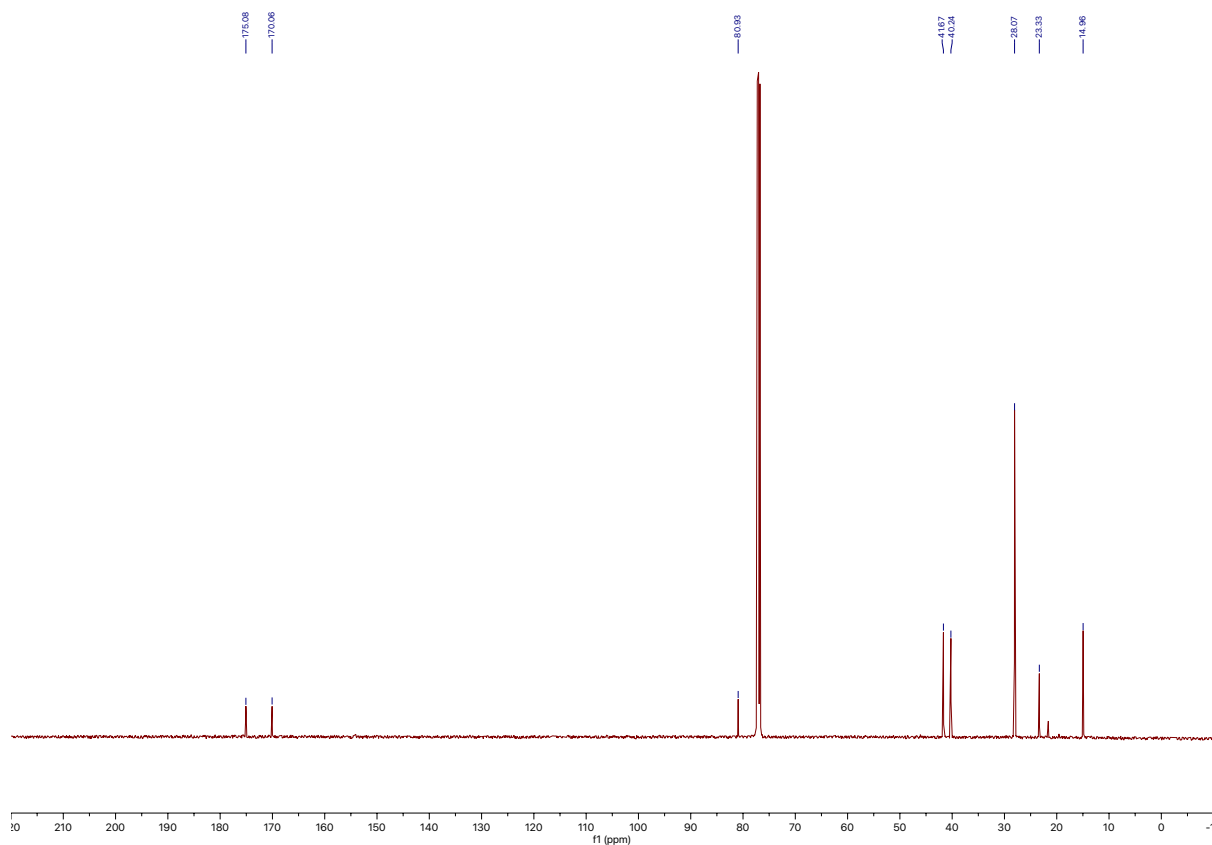

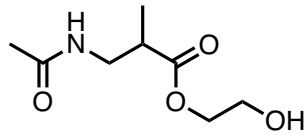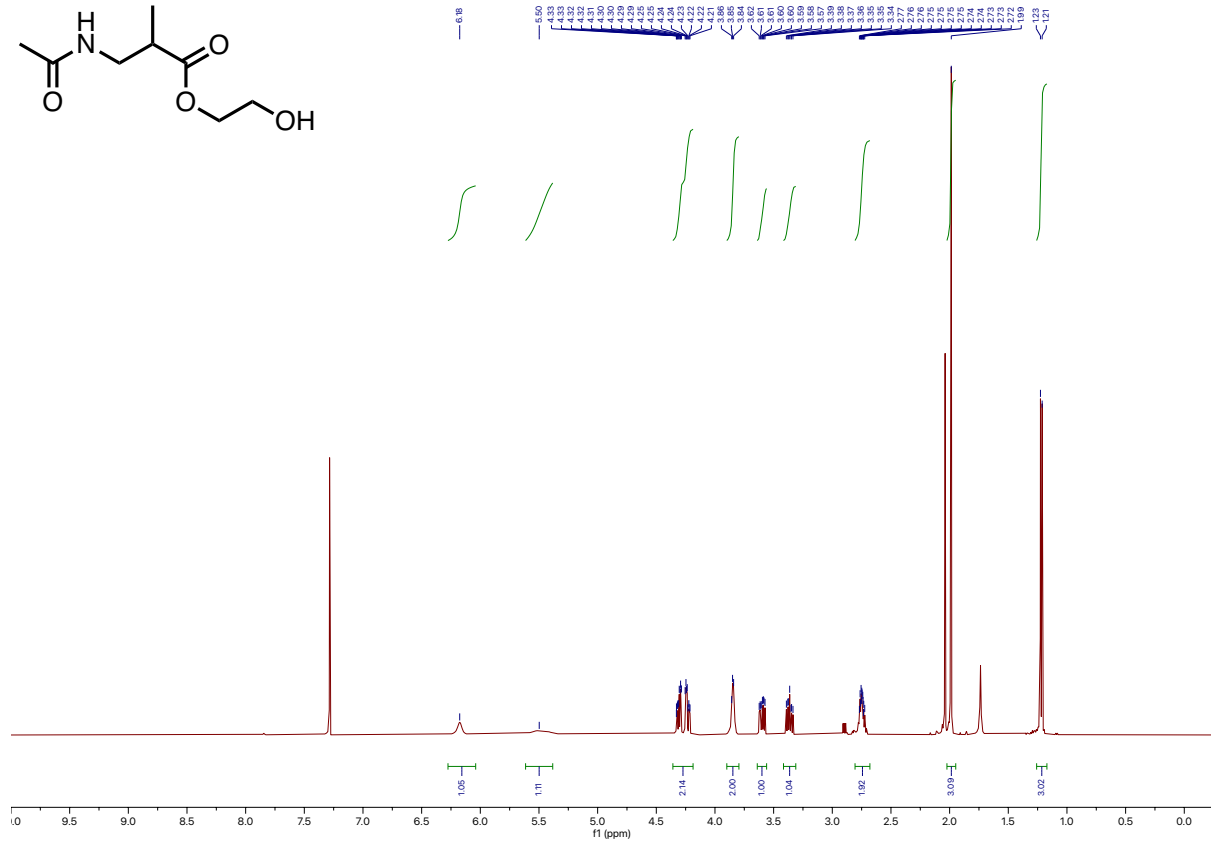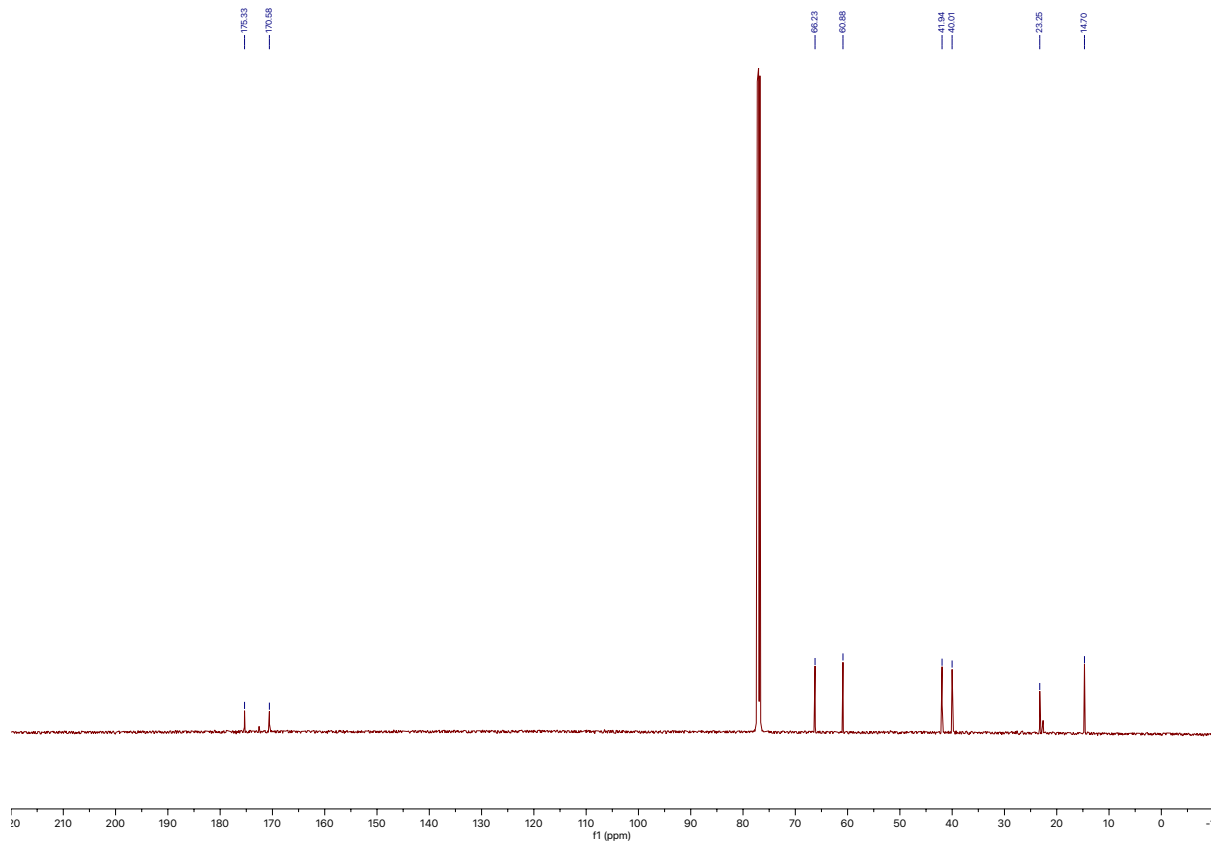









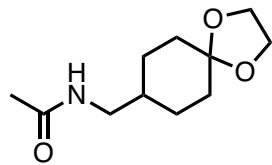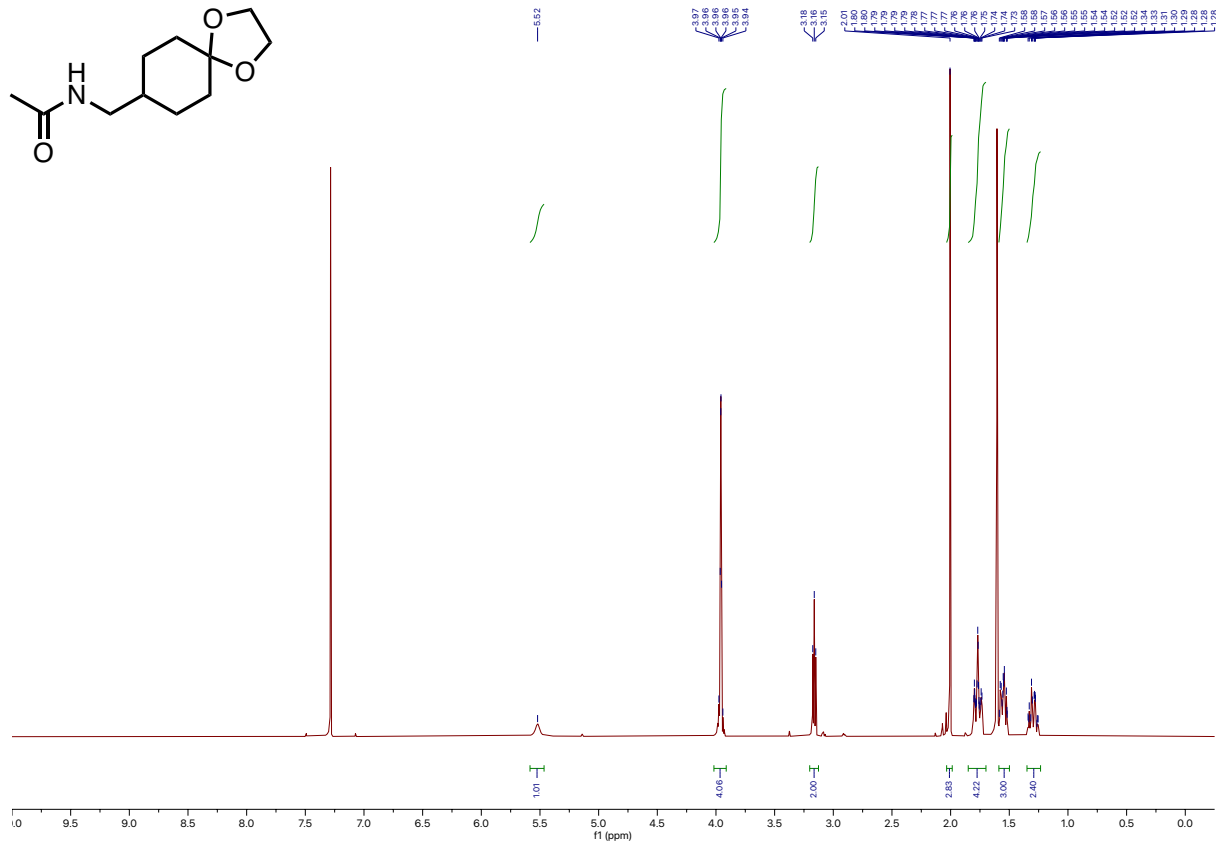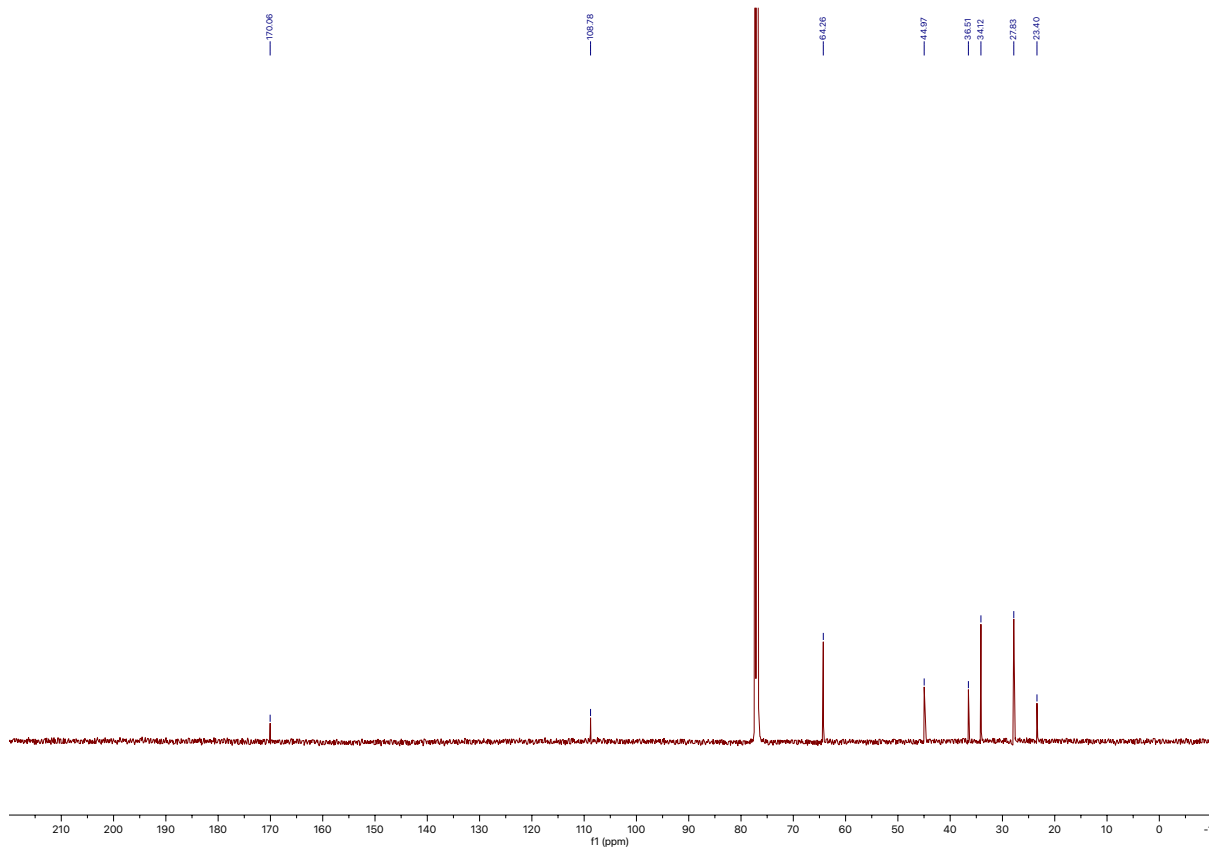









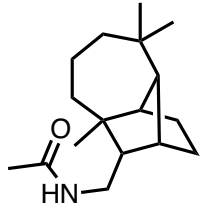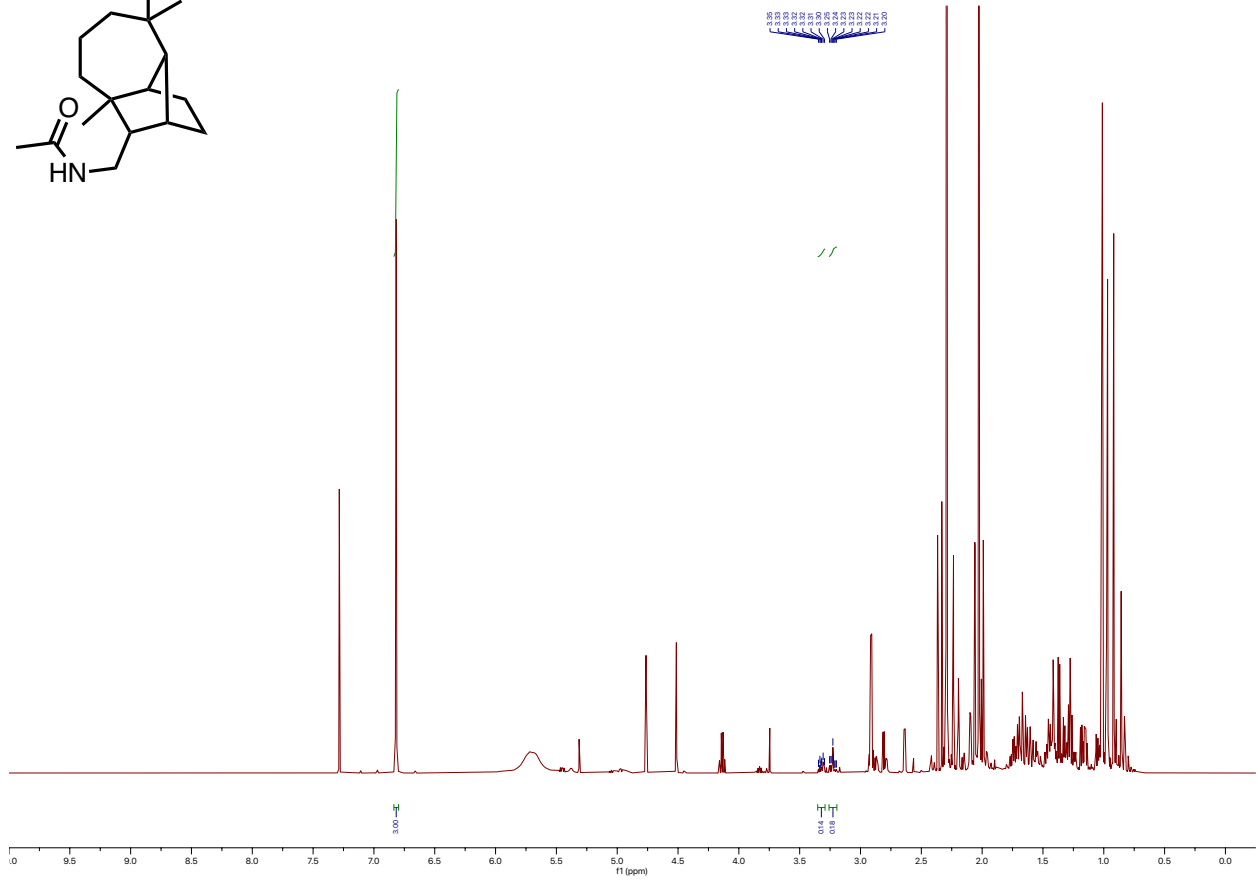

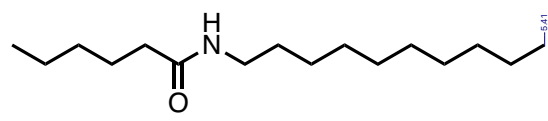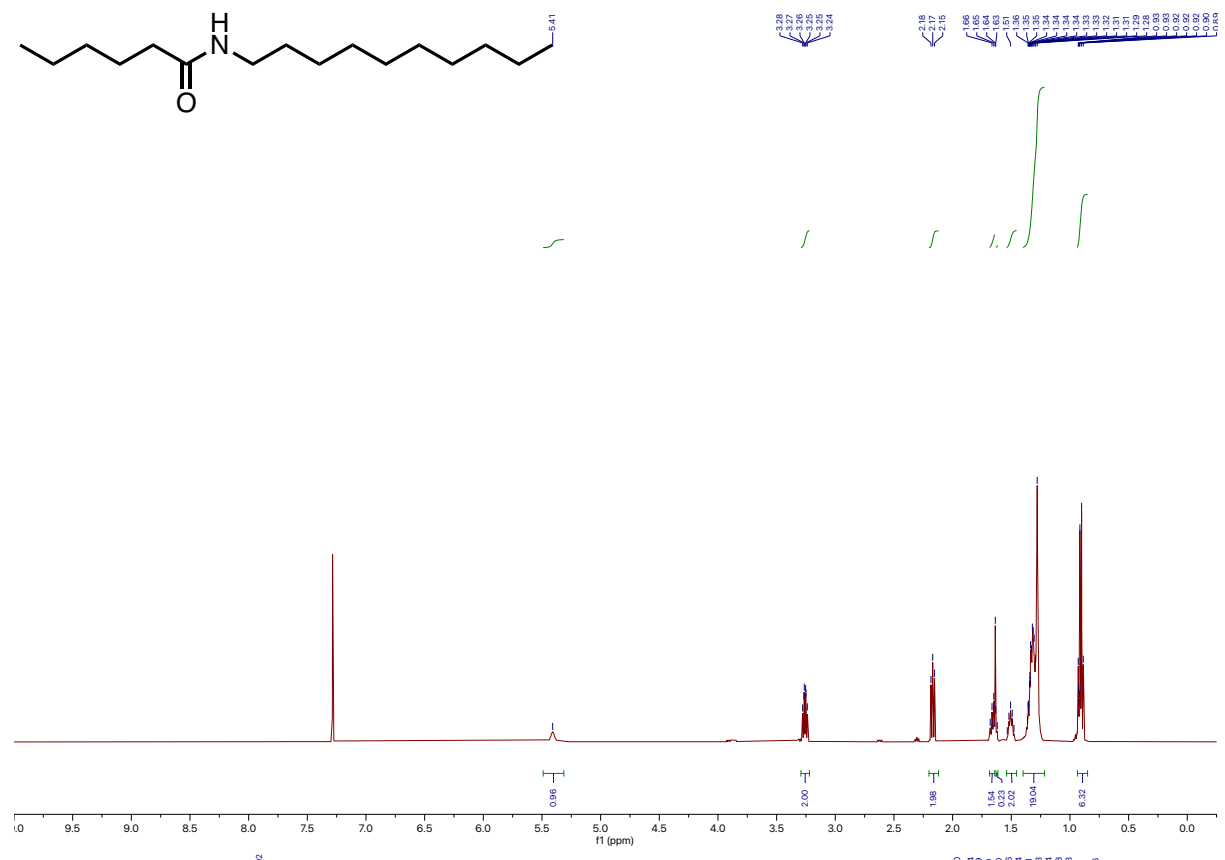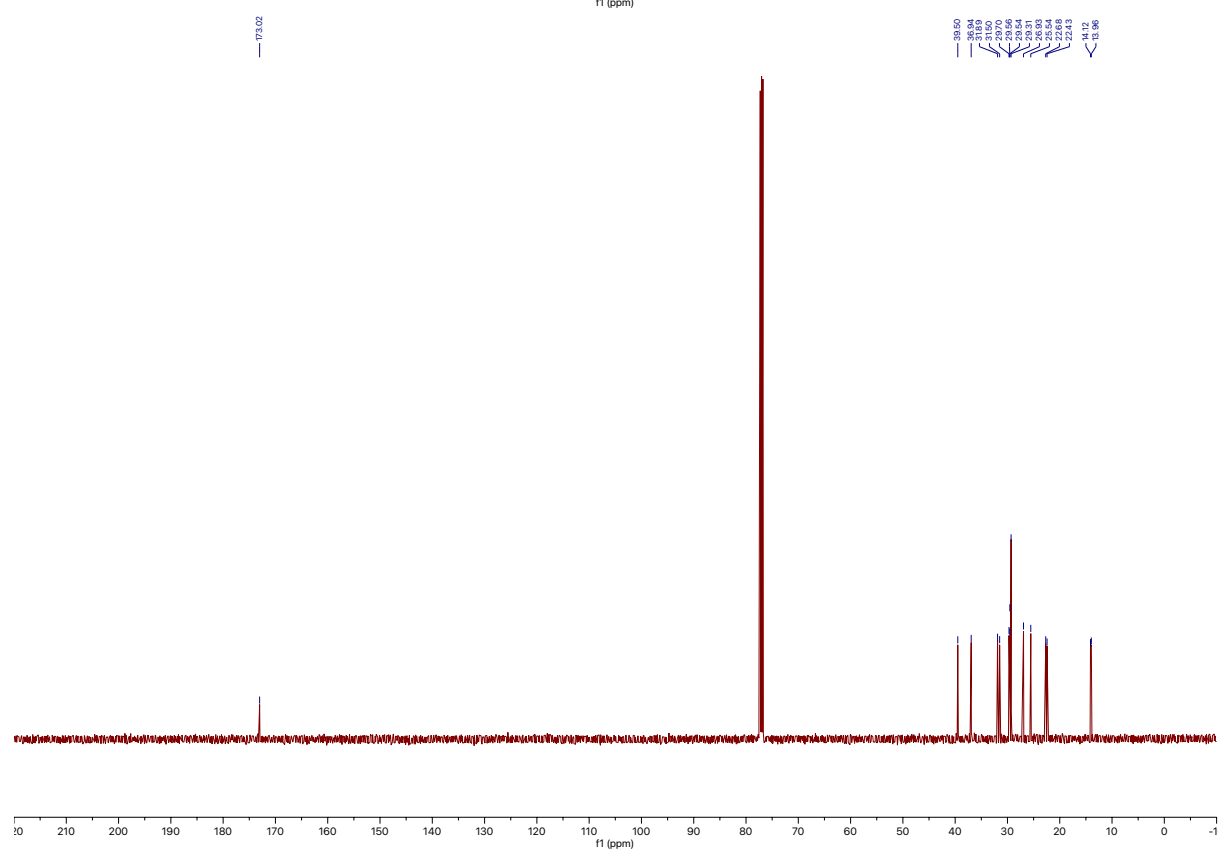

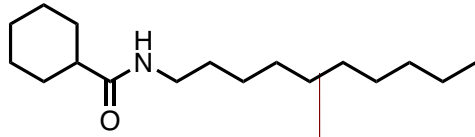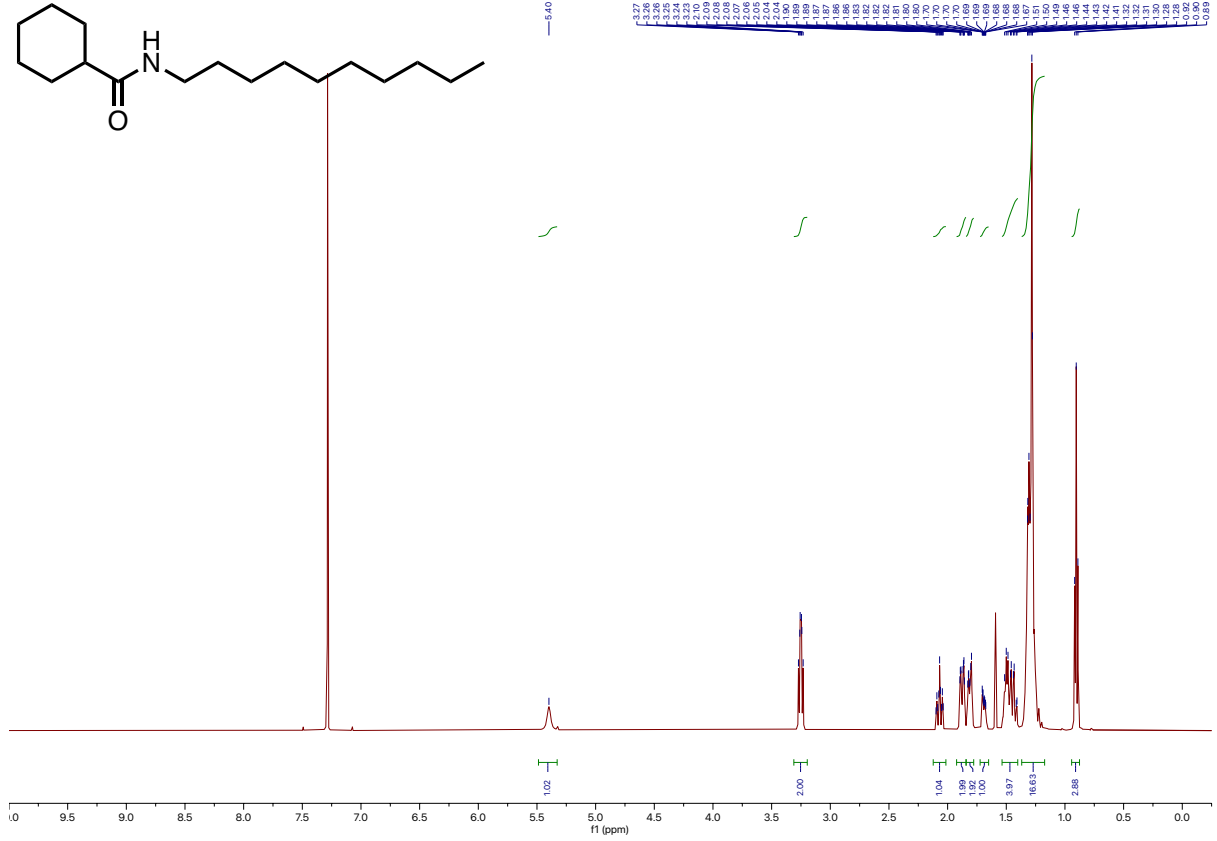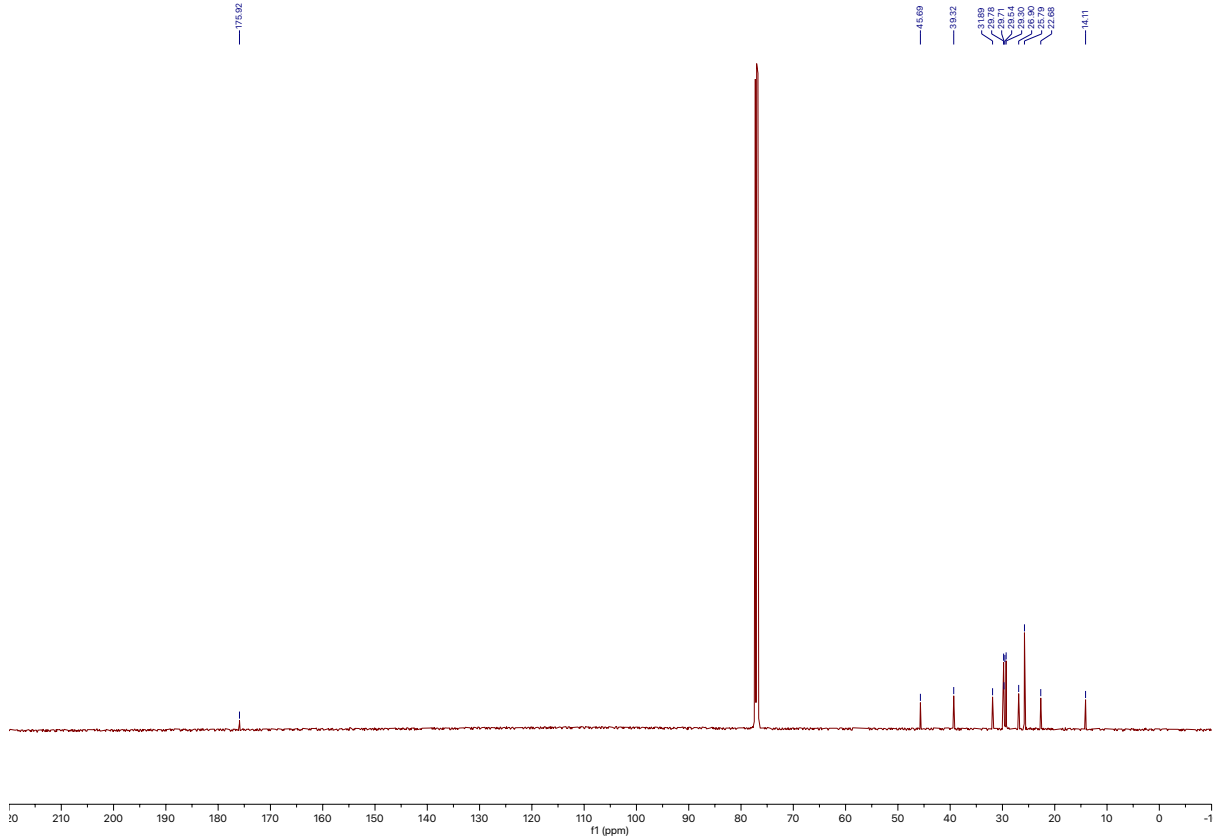





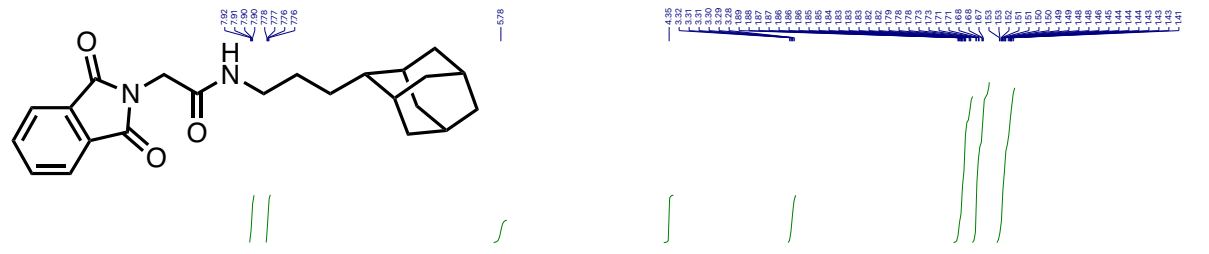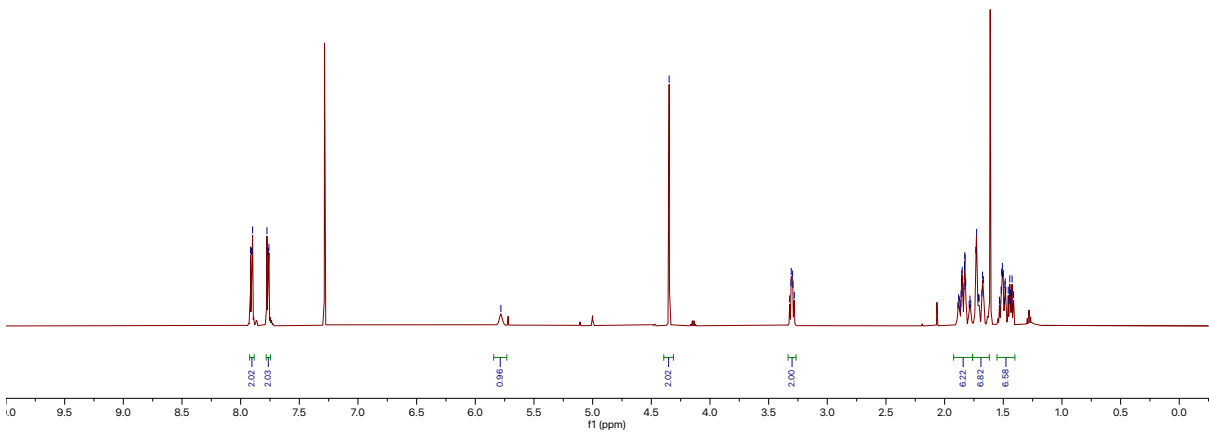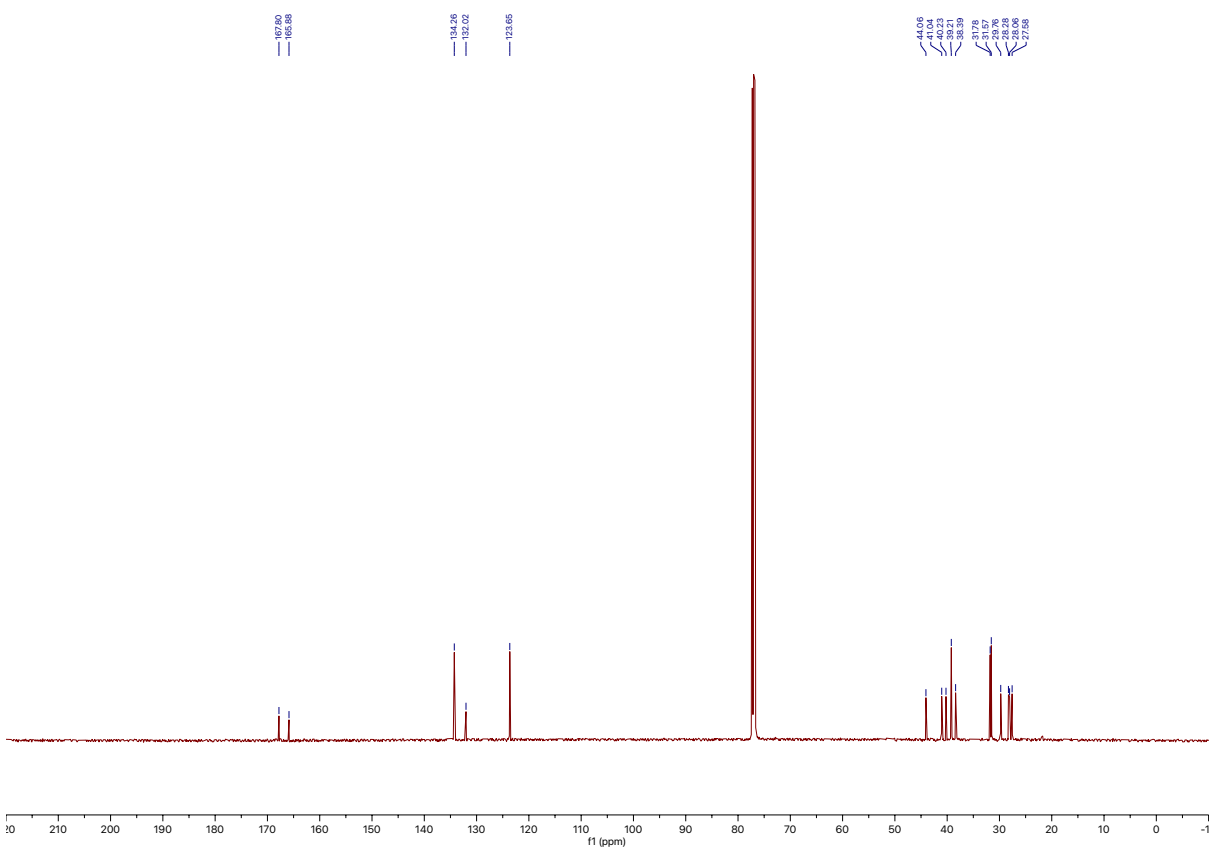



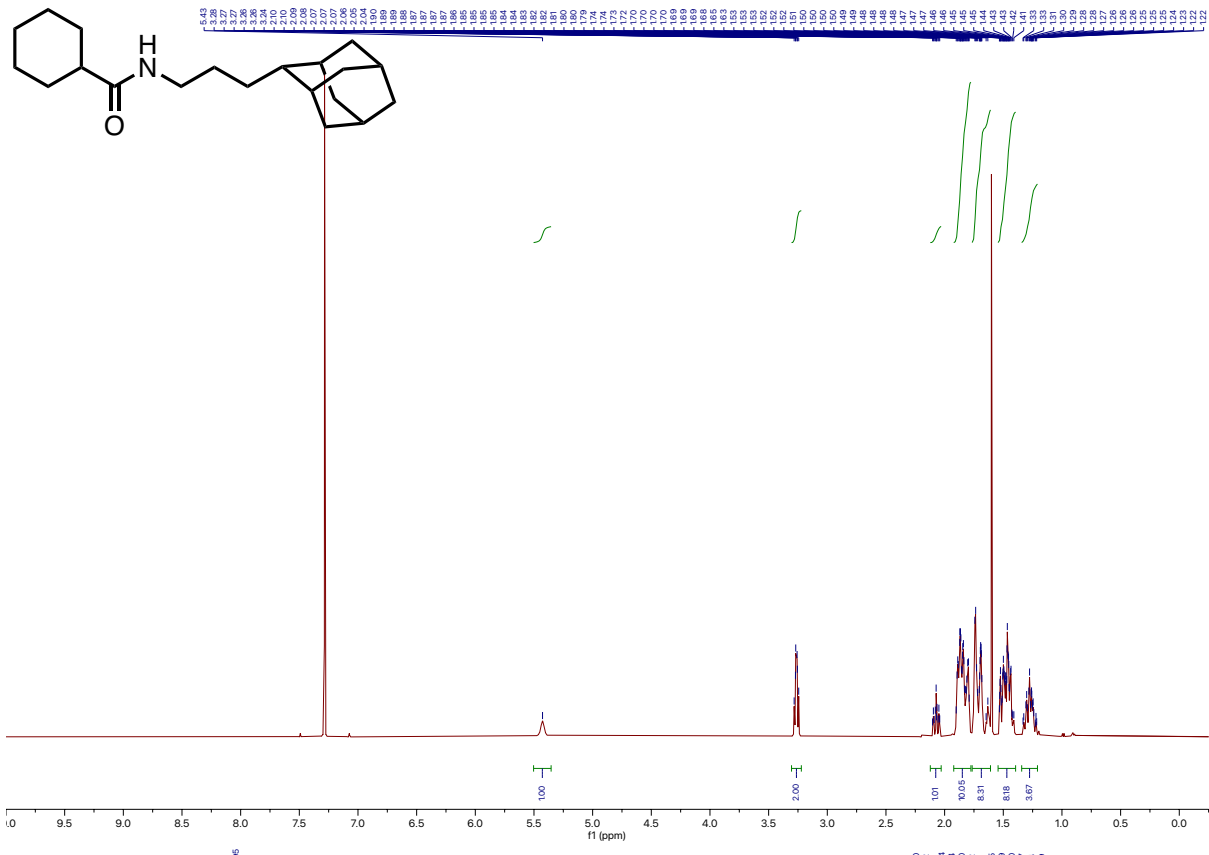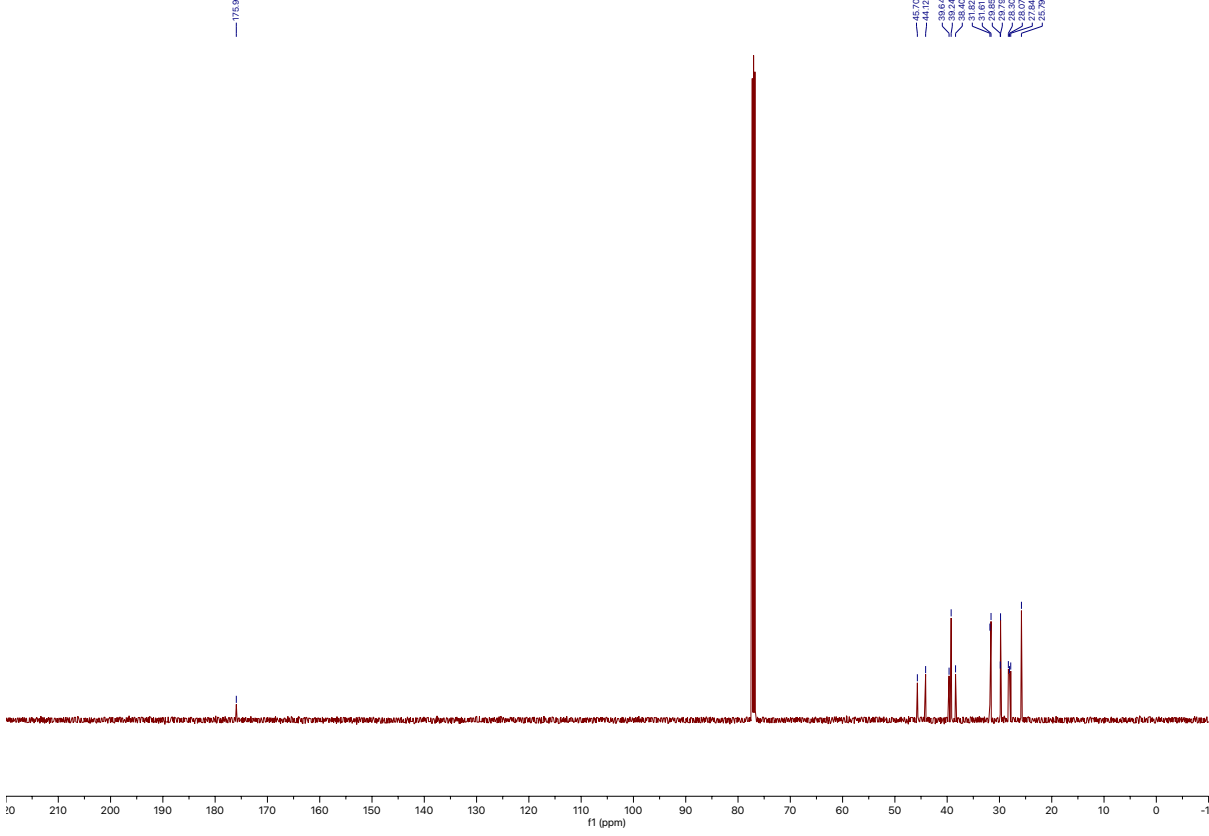

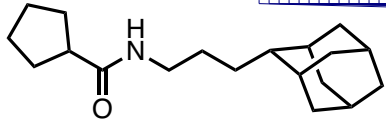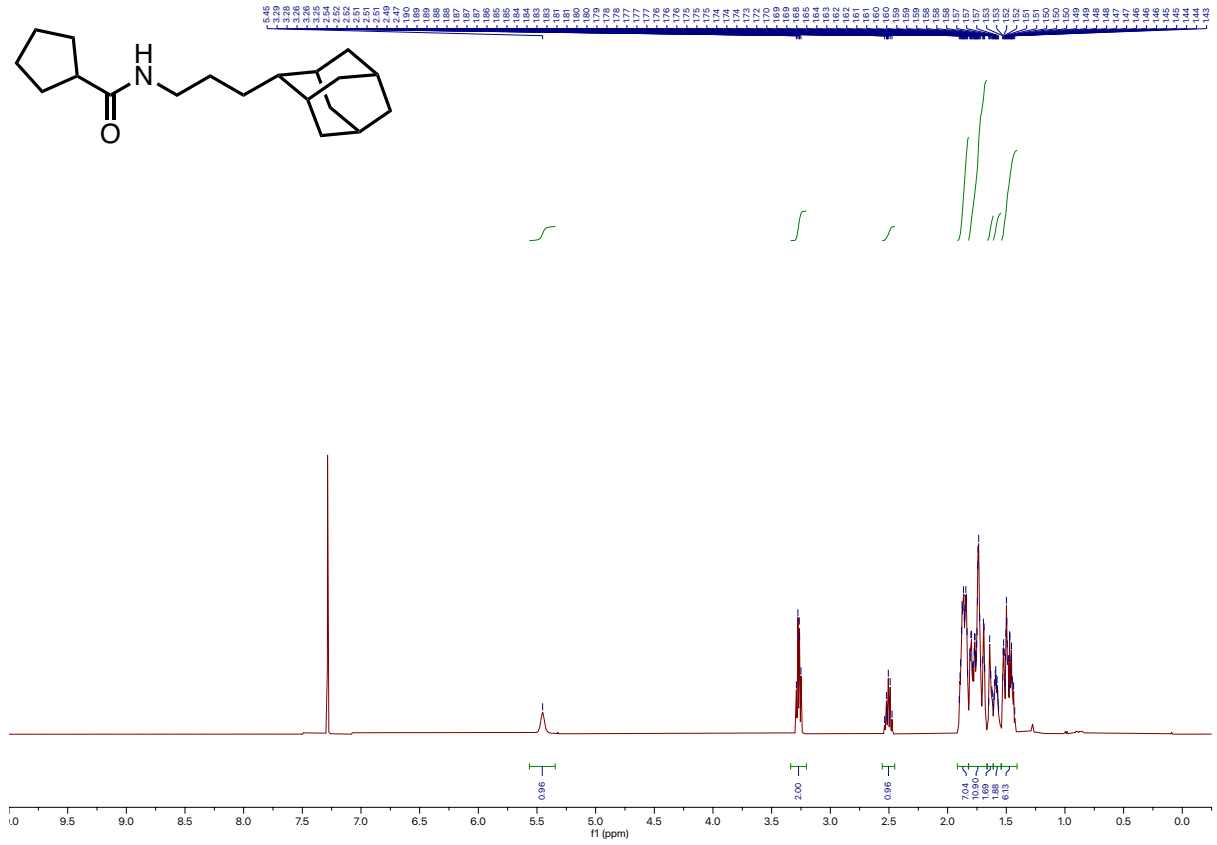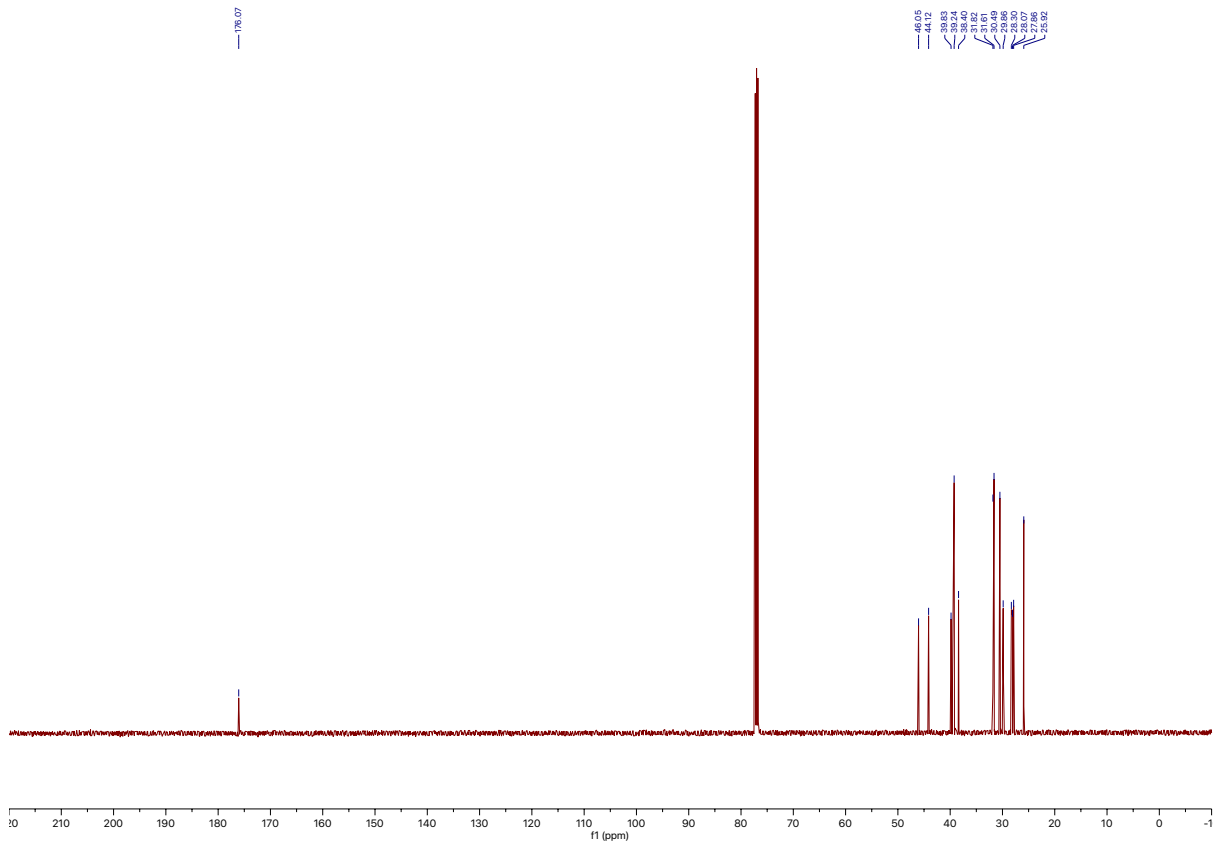

Supplement: NIHMS1935867-supplement-SI.pdf [file NIHMS1935867-supplement-SI.pdf]
