# Supplementary material
Source: PubMed Central journal article supplement (PMC10583218)
Supplement: NIHMS1935867-supplement-2.pdf [file NIHMS1935867-supplement-2.pdf]

## **ASSOCIATED CONTENT**

### **Supporting Information**

Experimental procedures and compound characterization. The Supporting Information is available free of charge on the ACS Publications website.
